# Supplementary material for: Modelling multi-phase halogen chemistry in the coastal marine boundary layer: investigation of the relative importance of local chemistry vs. long-range transport
Source: Copernicus journal article supplement (doi:10.5194/acp-11-979-2011), 2011-02-02
Supplement: Supplementary file 1 [file acp-11-979-2011-supplement.zip]

Archive with 21 entries (21 files):
- 1st_I2_emissions.txt
- 2nd_I2_emissions.txt
- aero-I2recycle-low_photo-low_tide-1st_I2_emissions.pdf
- aero-I2recycle-low_photo-low_tide-2nd_I2_emissions.pdf
- aero-I2recycle-low_tide-1st_I2_emissions.pdf
- aero-I2recycle-low_tide-2nd_I2_emissions.pdf
- aero-base_chem-beachBr2-low_tide-1st_I2_emissions.pdf
- aero-base_chem-high_tide.pdf
- aero-base_chem-low_photo-low_tide-1st_I2_emissions.pdf
- aero-base_chem-low_photo-low_tide-2nd_I2_emissions.pdf
- aero-base_chem-low_tide-1st_I2_emissions.pdf
- aero-base_chem-low_tide-2nd_I2_emissions.pdf
- aero-base_chem-seaBr2-high_tide.pdf
- aero-base_chem-seaBr2-low_tide-1st_I2_emissions.pdf
- 07sept1200backtraj.png
- atlantic_channel-prognositics.pdf
- column_data.txt
- gas_plots.pdf
- lowe-rhamble-scheme.pdf
- vertical_met.pdf
- diurnal_photolysis_profiles.pdf
