# Supplementary material for: Modelling multi-phase halogen chemistry in the coastal marine boundary layer: investigation of the relative importance of local chemistry vs. long-range transport
Source: Copernicus journal article supplement (doi:10.5194/acp-11-979-2011), 2011-02-02

Base Chemistry Scheme, at Low Tide, with Beach Br<sub>2</sub> Source and First I<sub>2</sub> Emission Scenario

pH, dry mole fraction and Cl<sup>-</sup>:Na<sup>+</sup> ratio for the  
seasalt and non-seasalt aerosol modes

Seasalt Mode

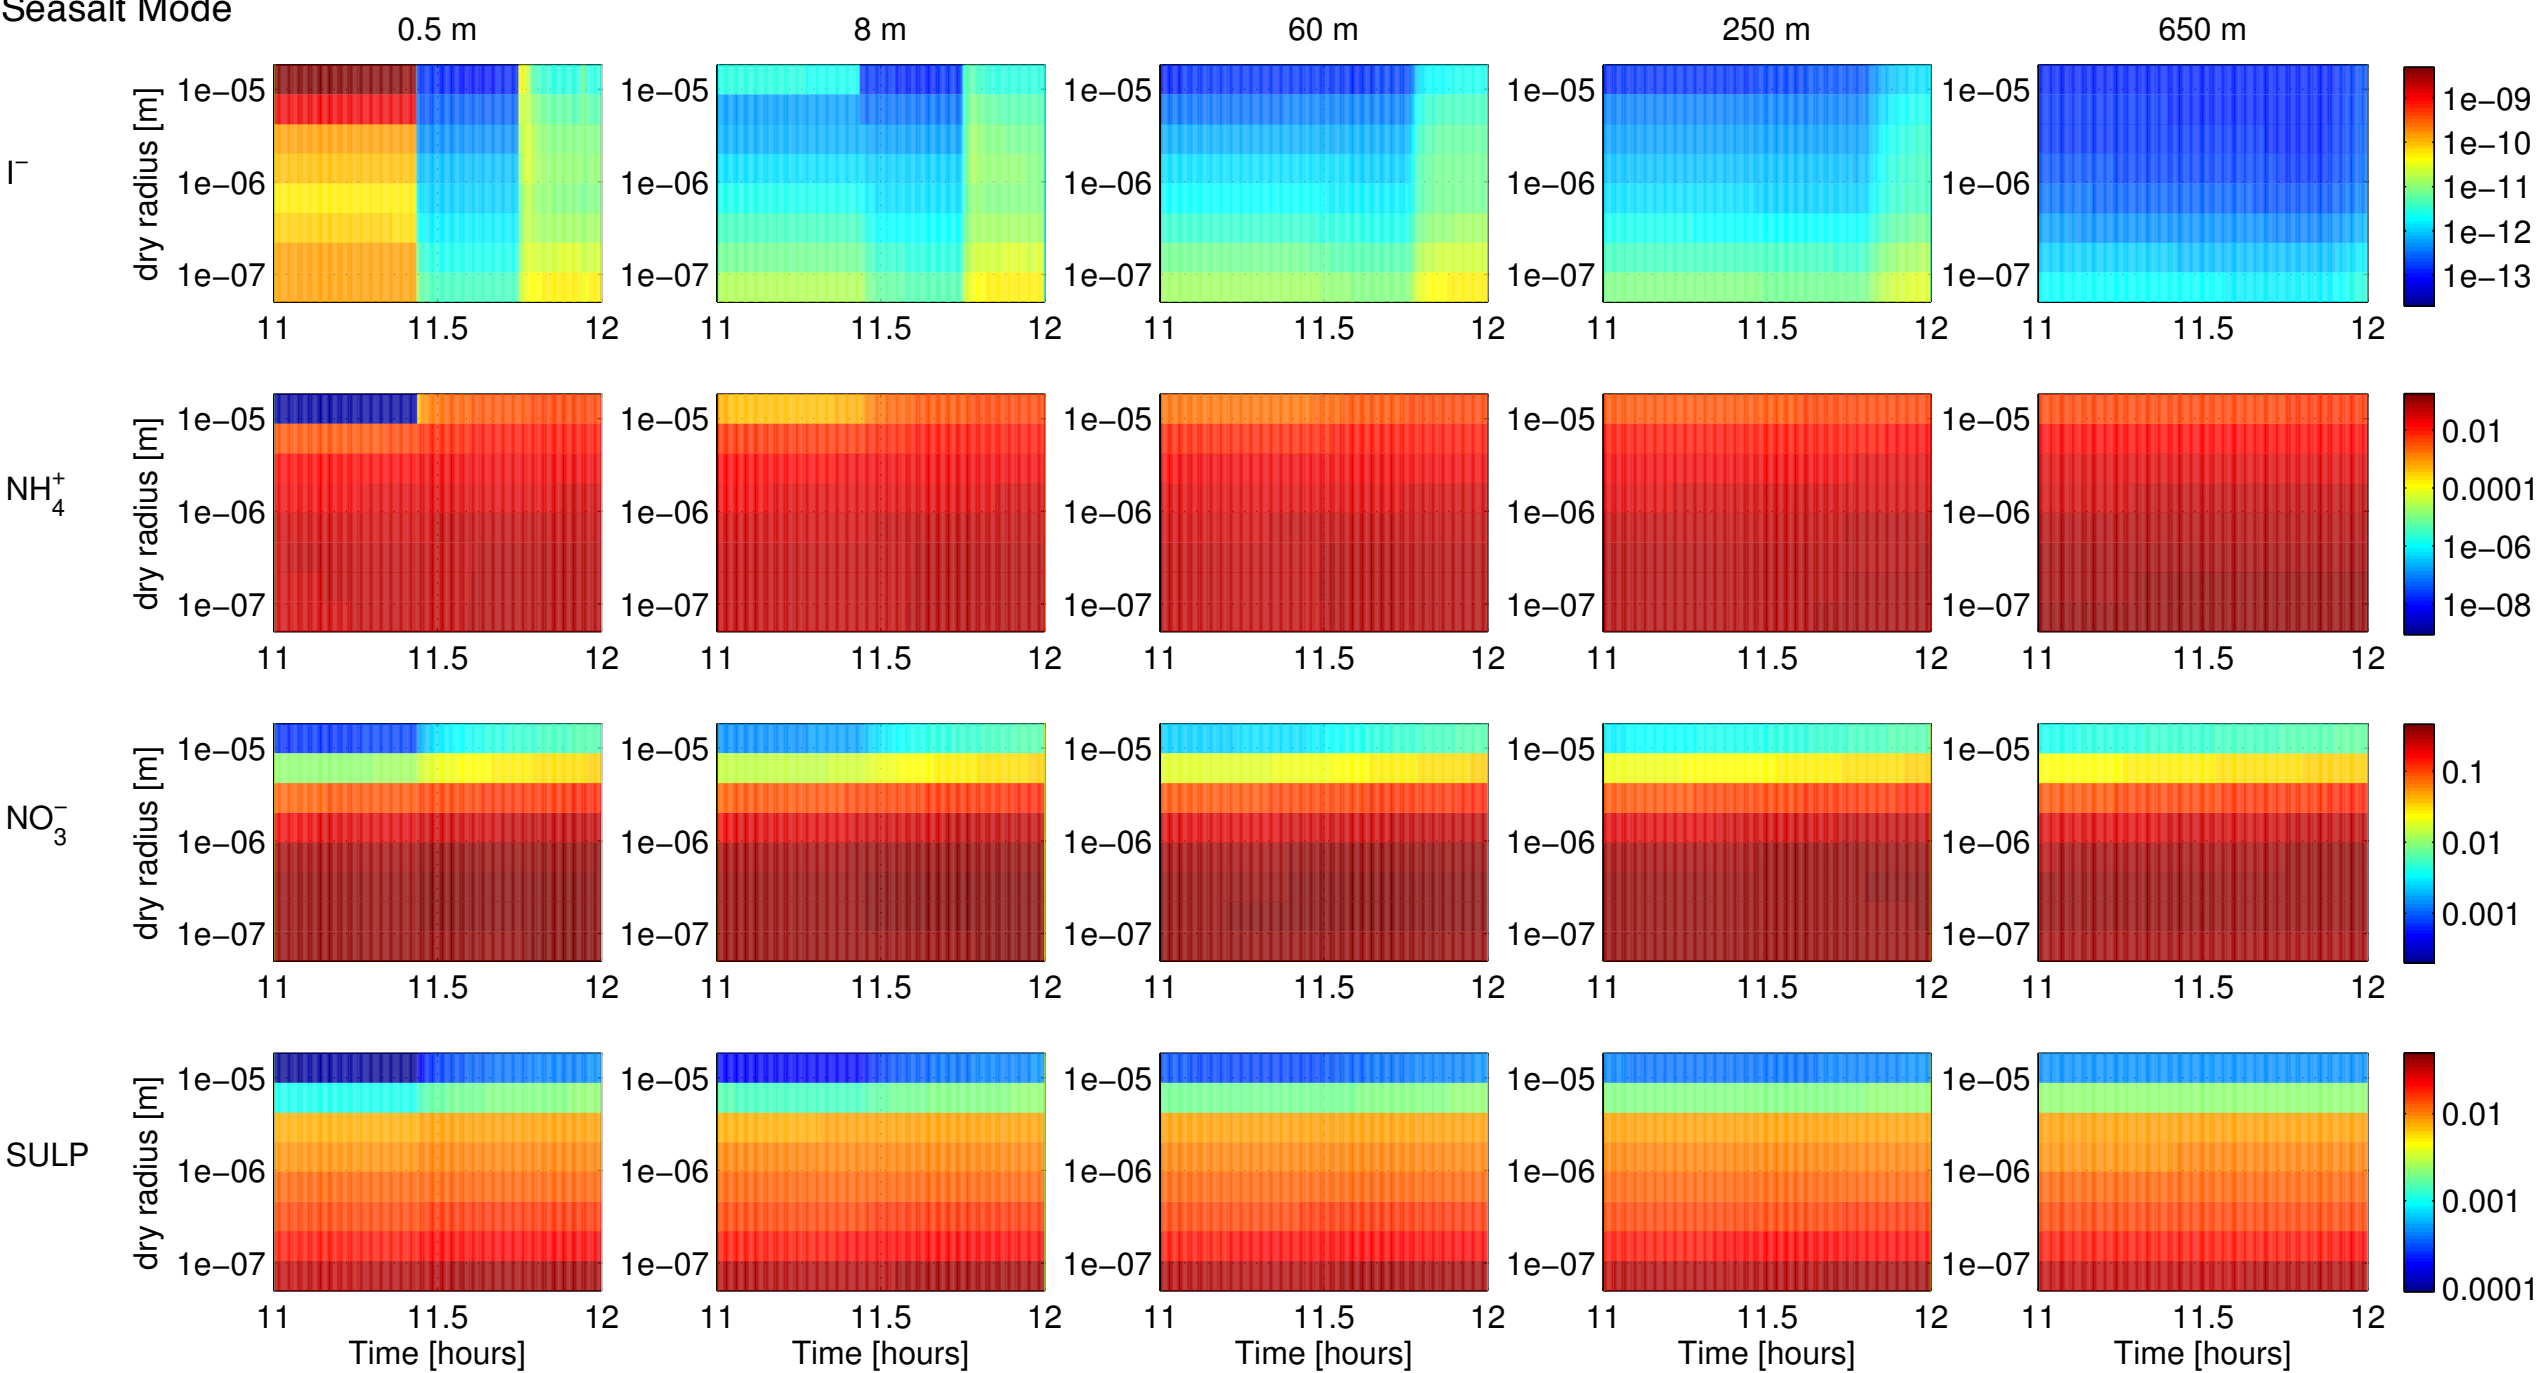

# Seasalt Mode

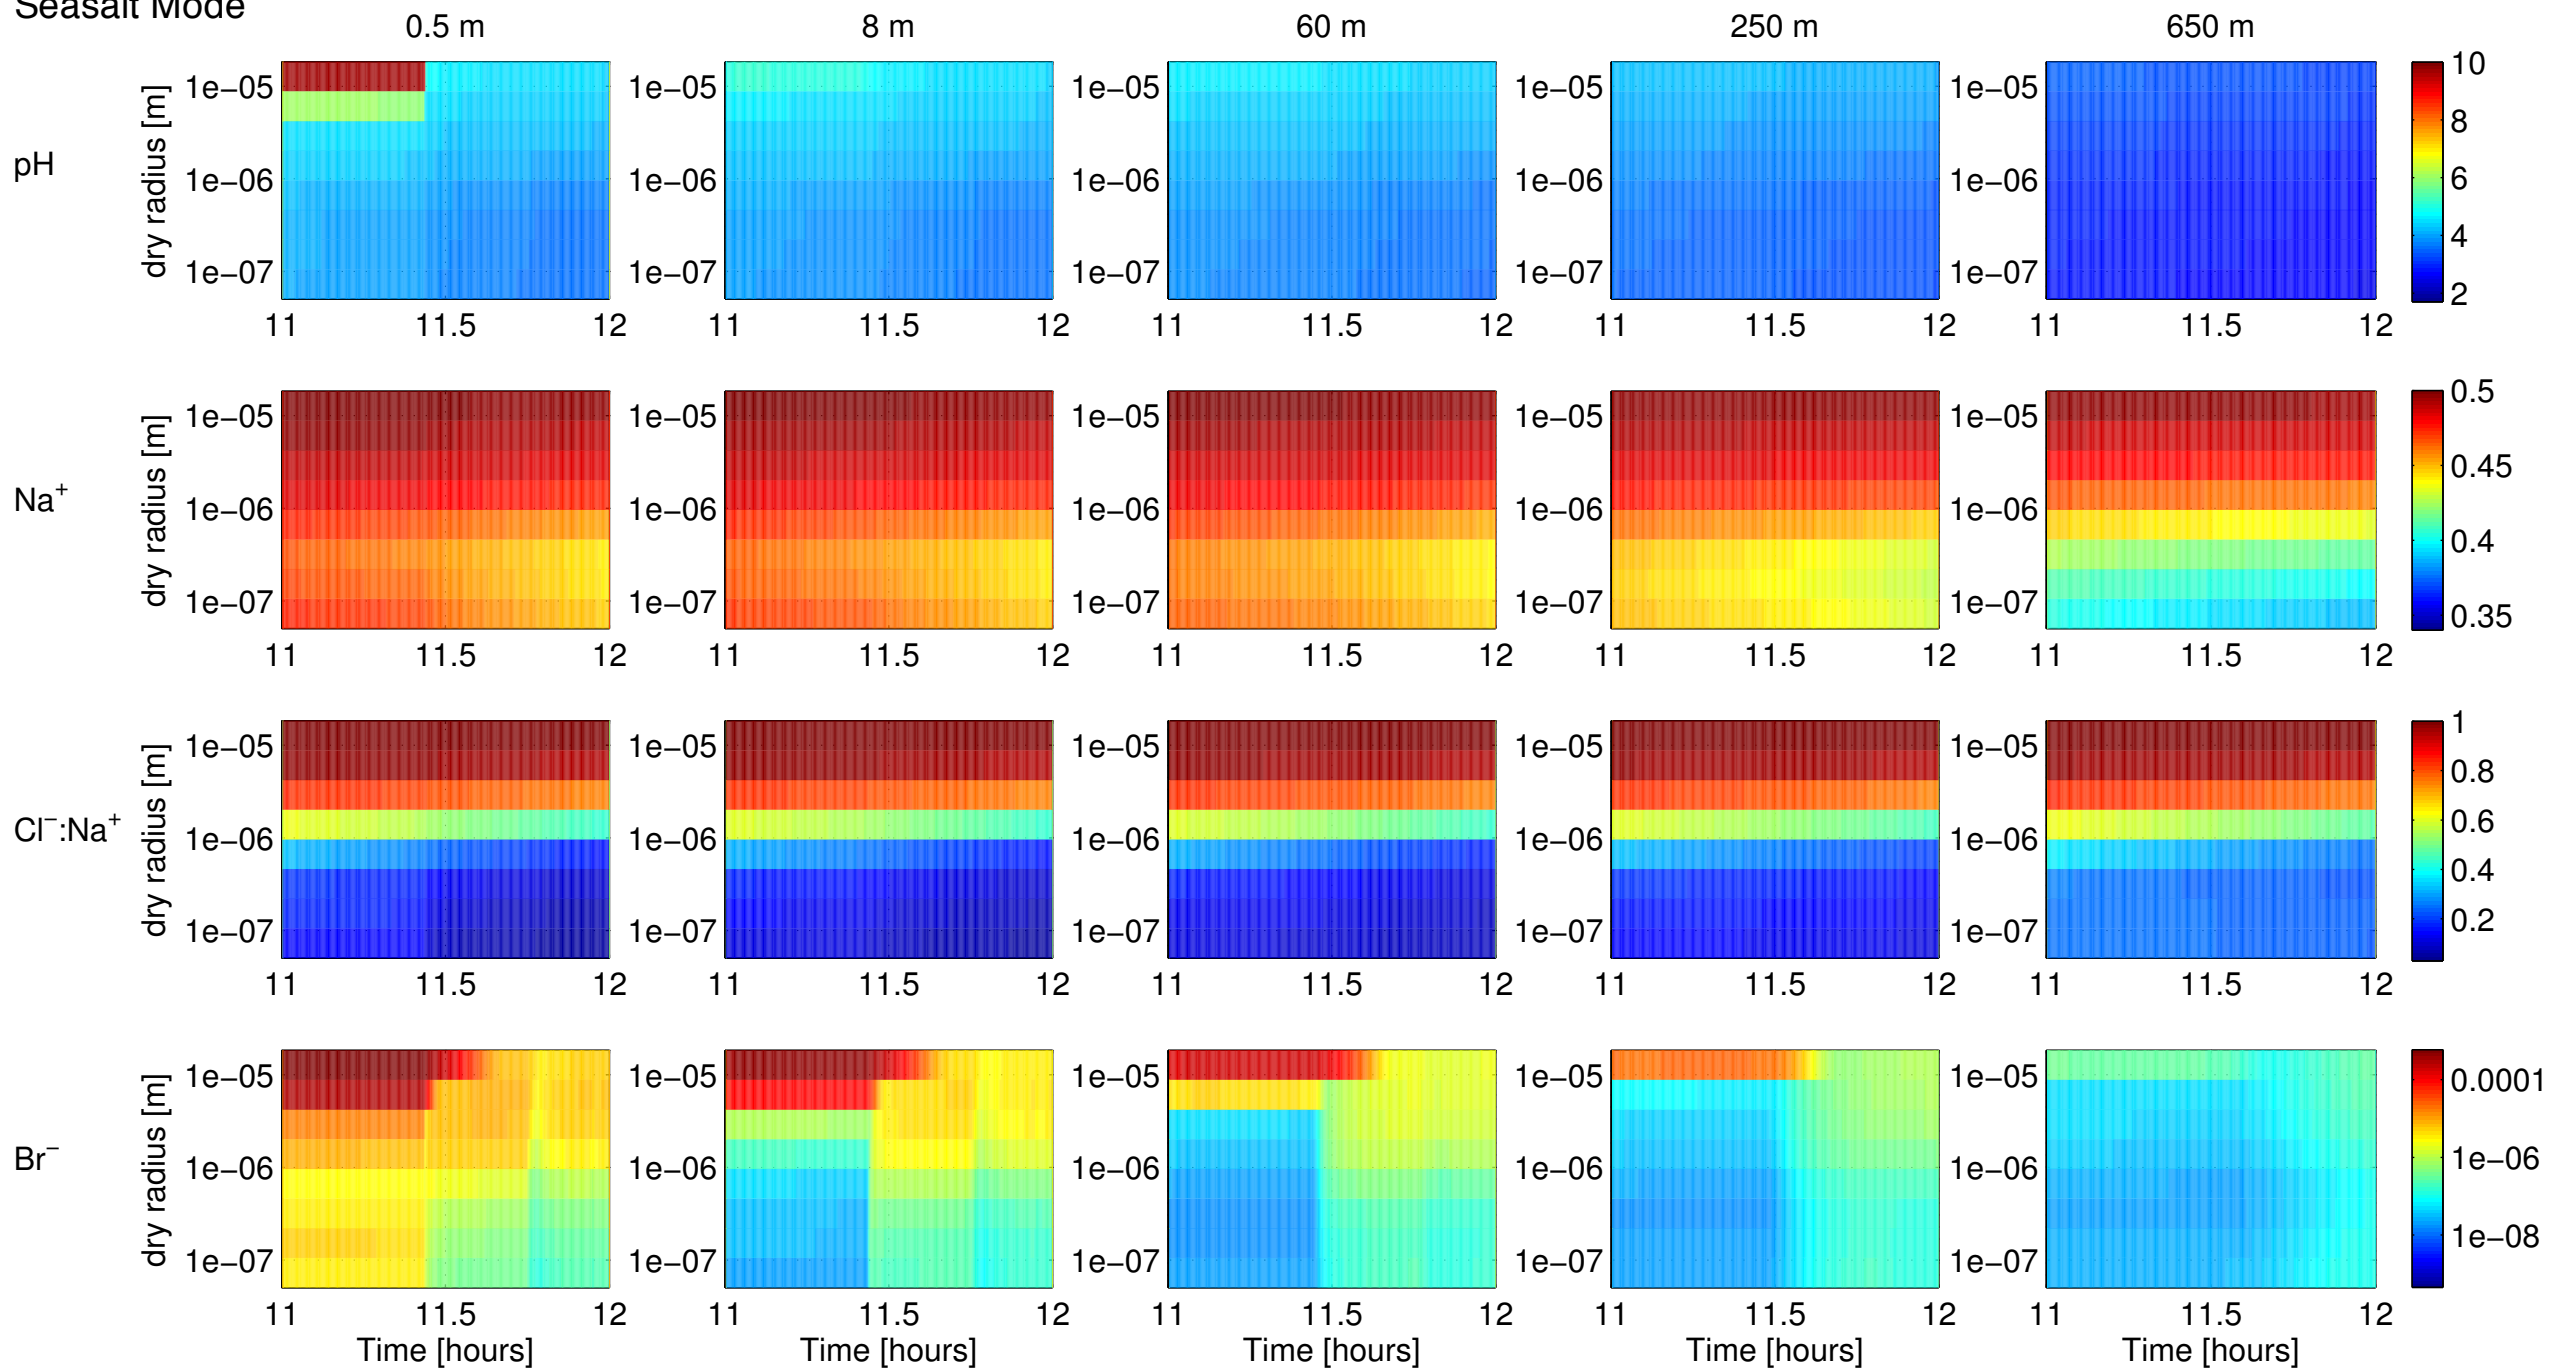

Non-Seasalt Mode

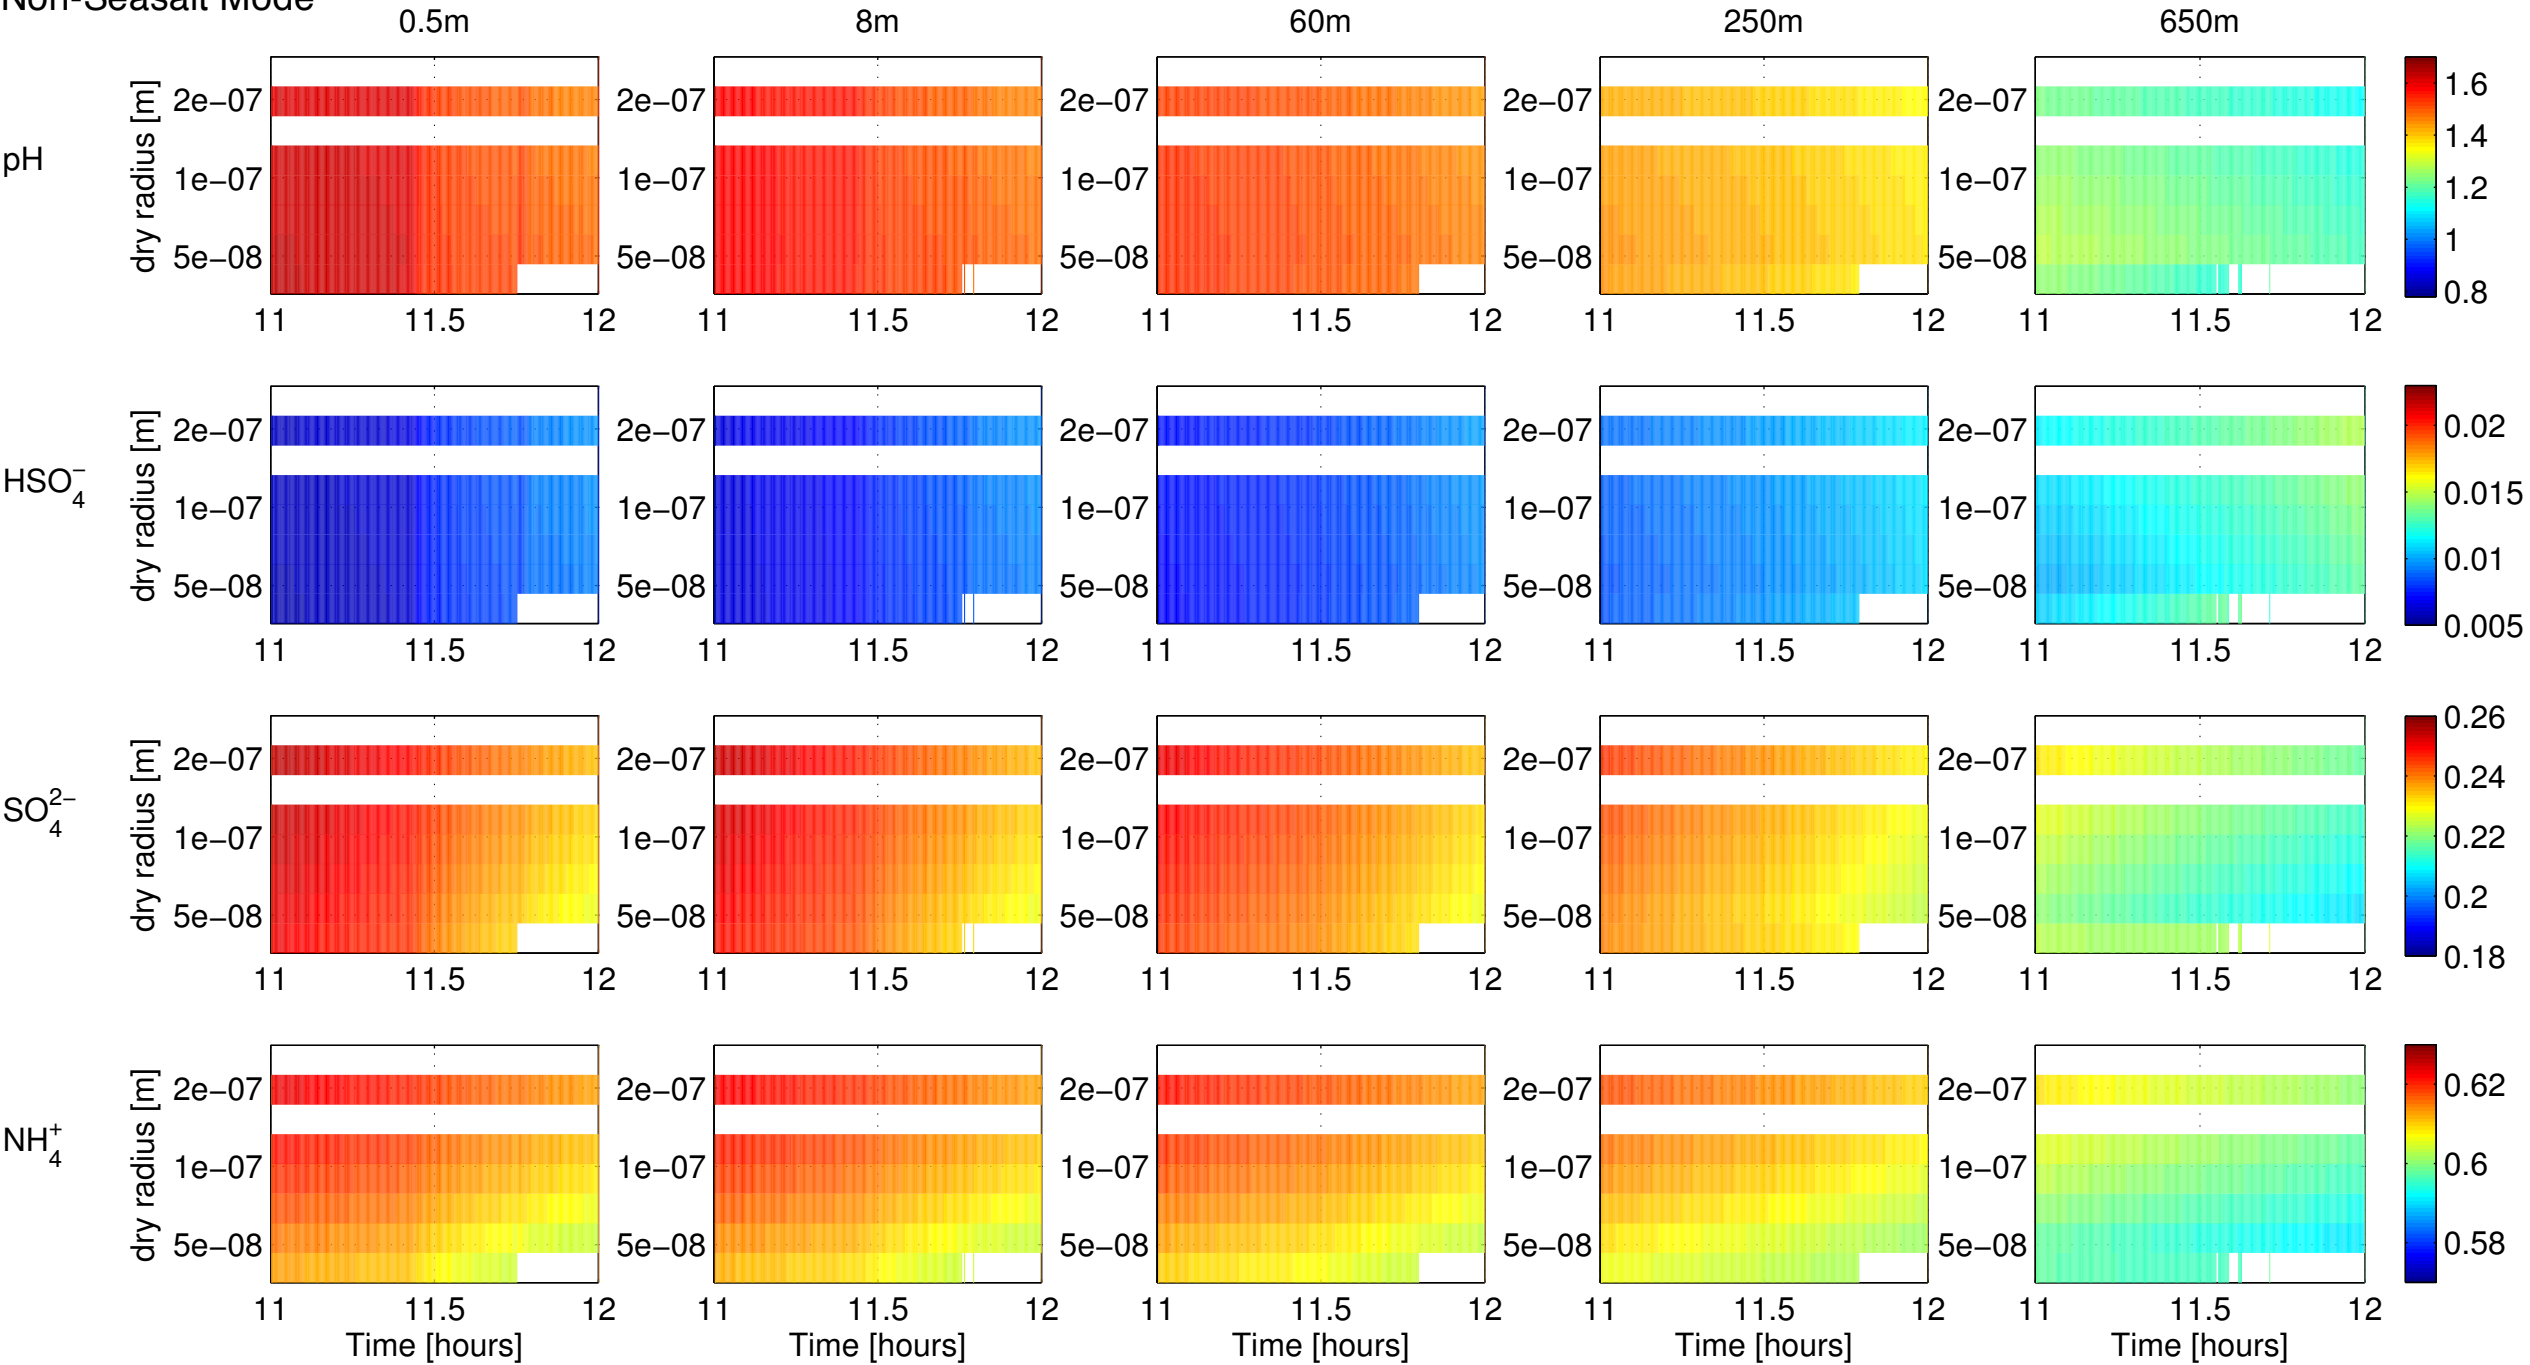

Non-Seasalt Mode

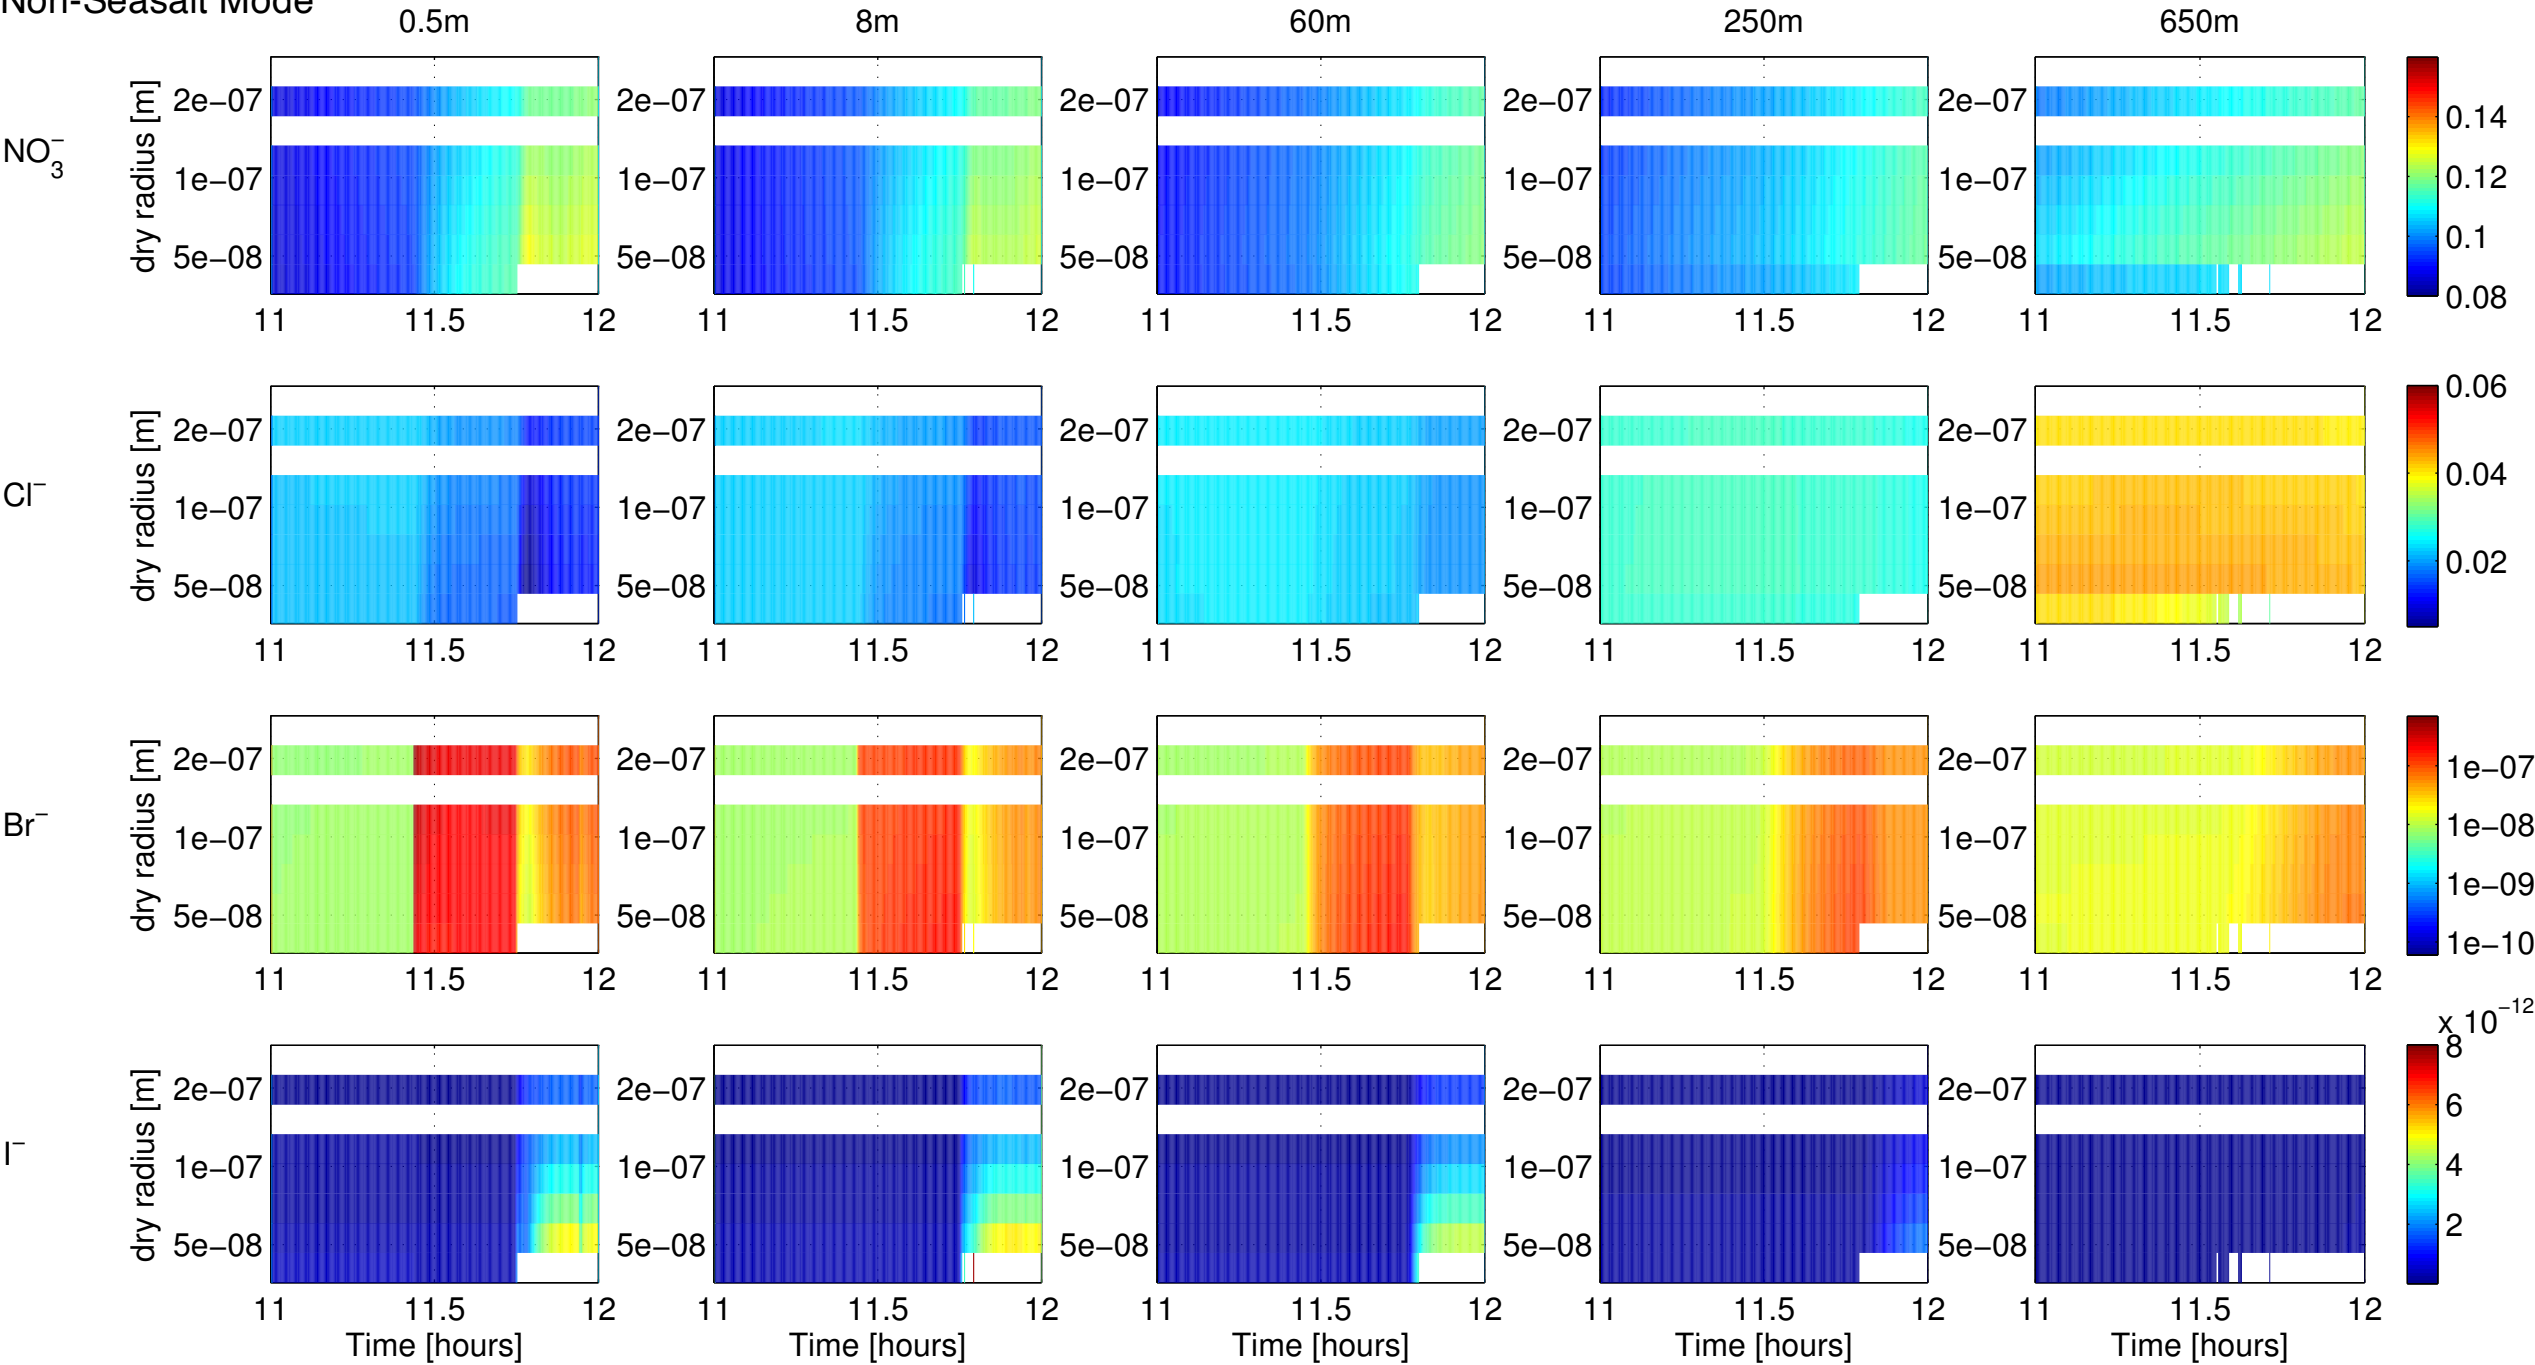

Supplement: Supplementary file 1 [file acp-11-979-2011-supplement.zip › aero-base_chem-beachBr2-low_tide-1st_I2_emissions.pdf]
