# Supplementary material for: Modelling multi-phase halogen chemistry in the coastal marine boundary layer: investigation of the relative importance of local chemistry vs. long-range transport
Source: Copernicus journal article supplement (doi:10.5194/acp-11-979-2011), 2011-02-02

Base Chemistry Scheme, at High Tide.

pH, dry mole fraction and  $\text{Cl}^-:\text{Na}^+$  ratio for the  
seasalt and non-seasalt aerosol modes.

# Seasalt Mode

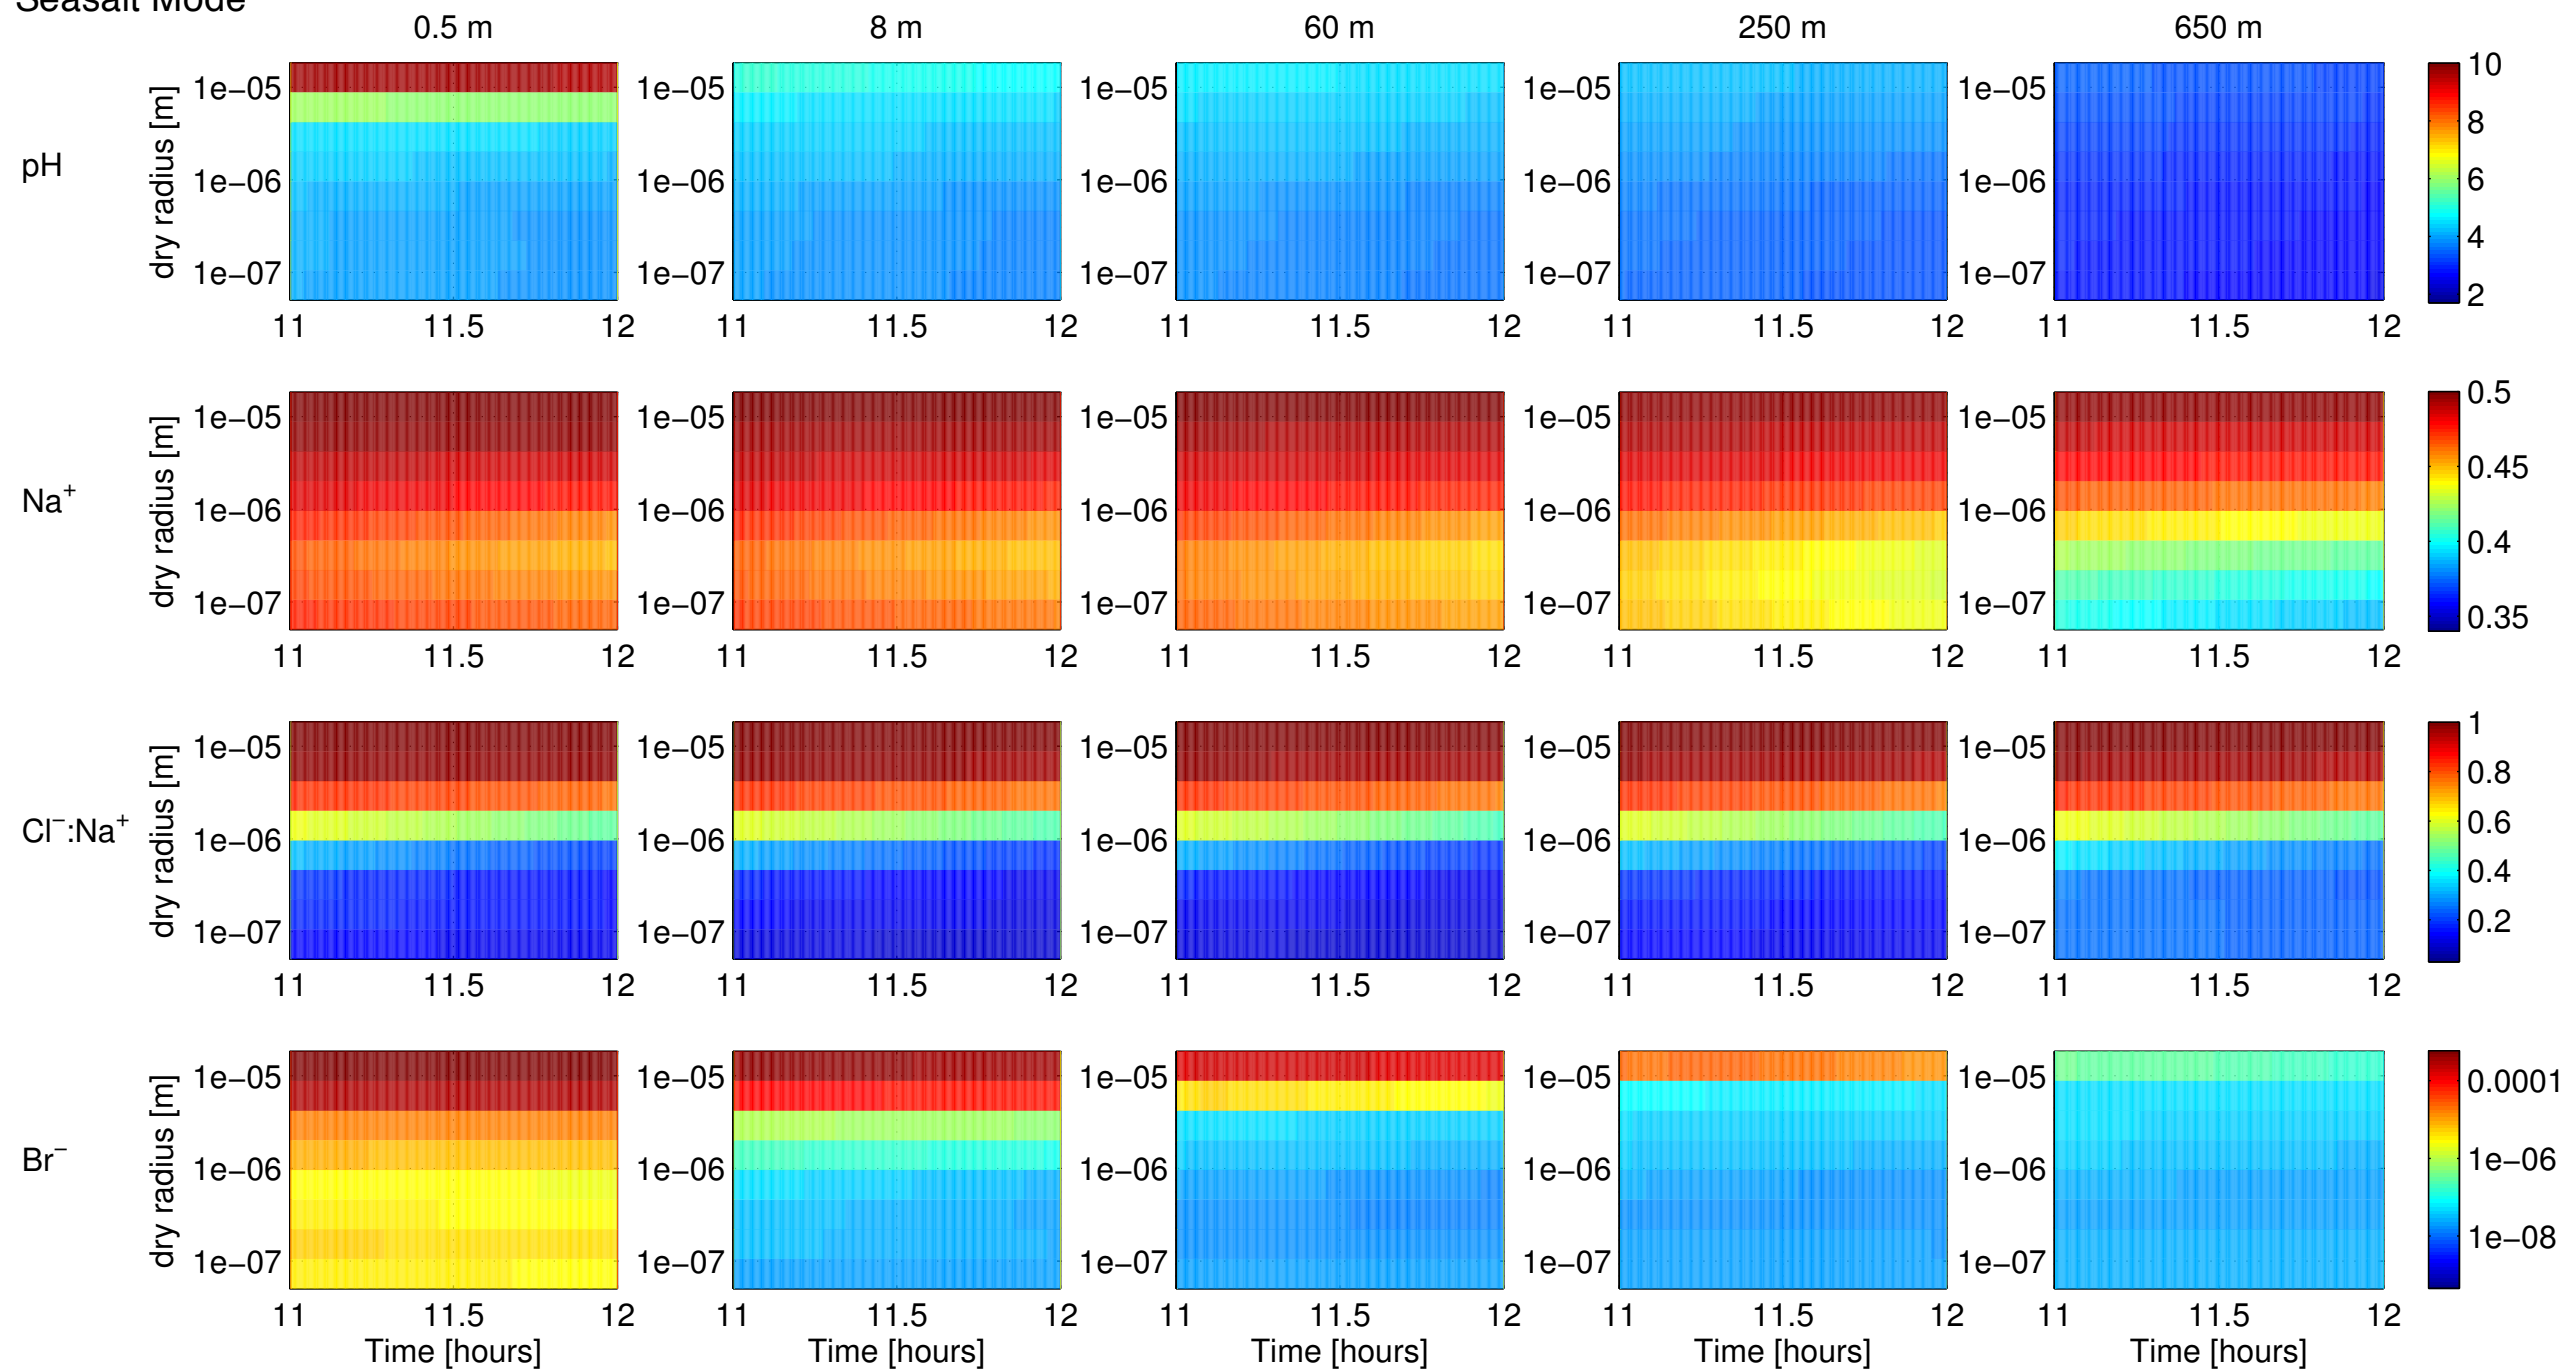

Seasalt Mode

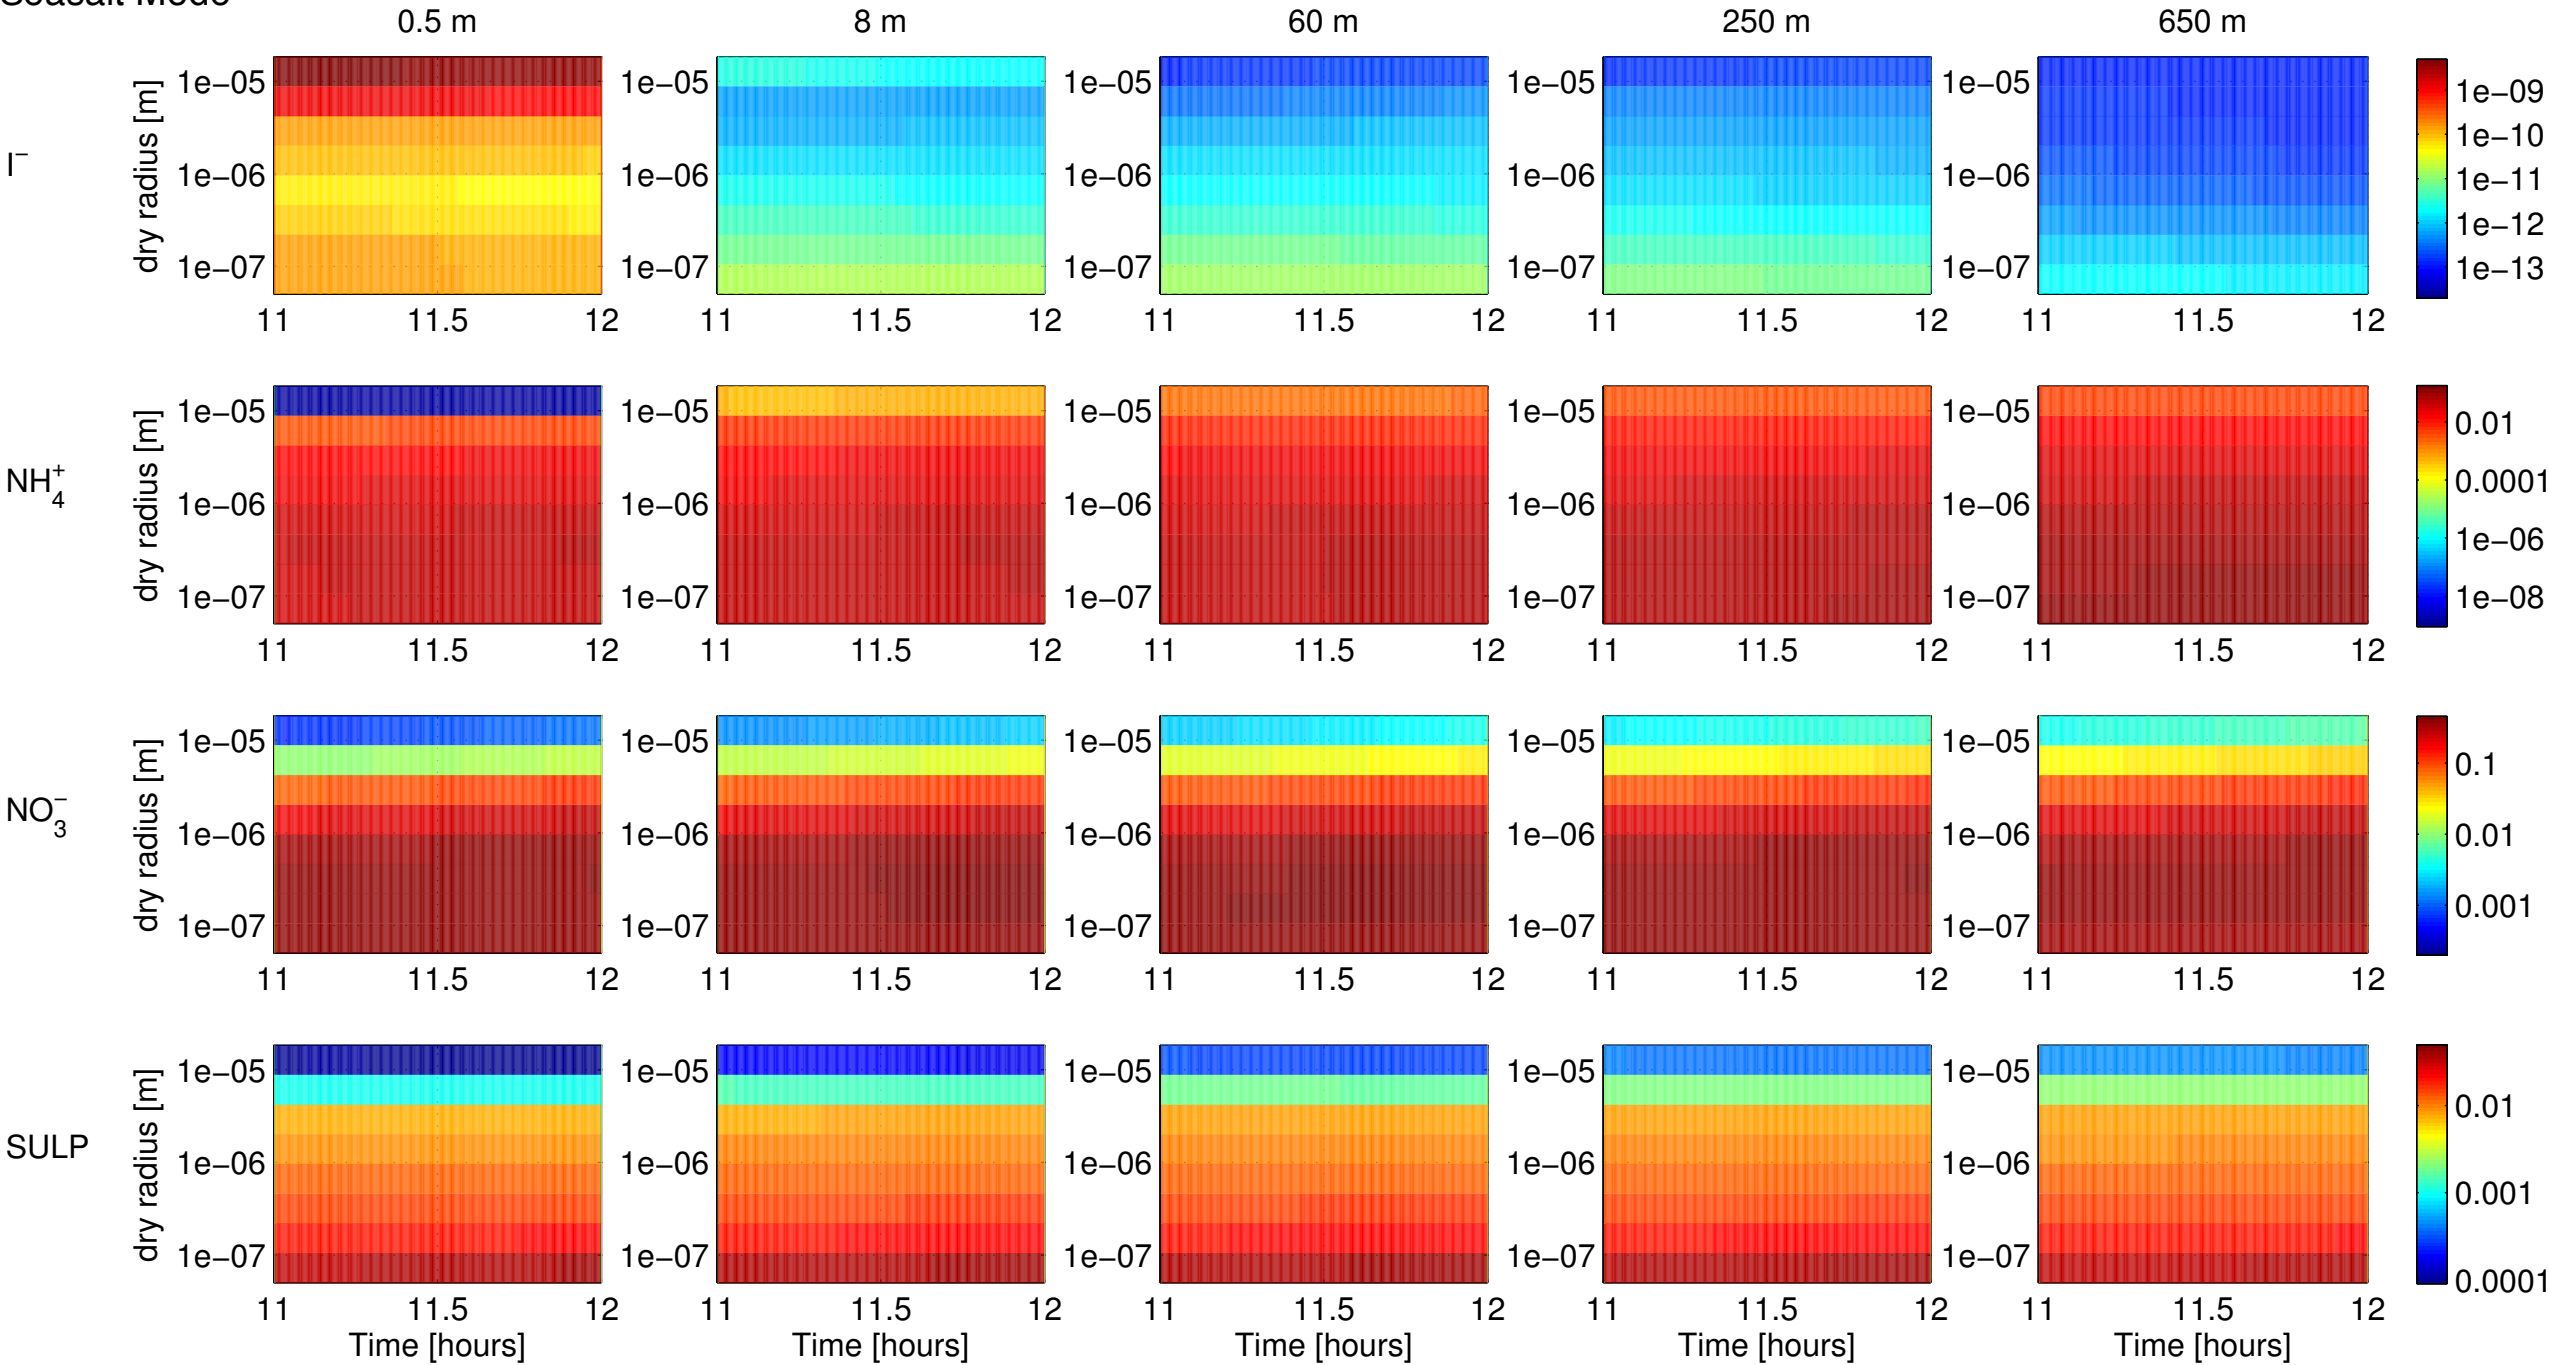

Non-Seasalt Mode

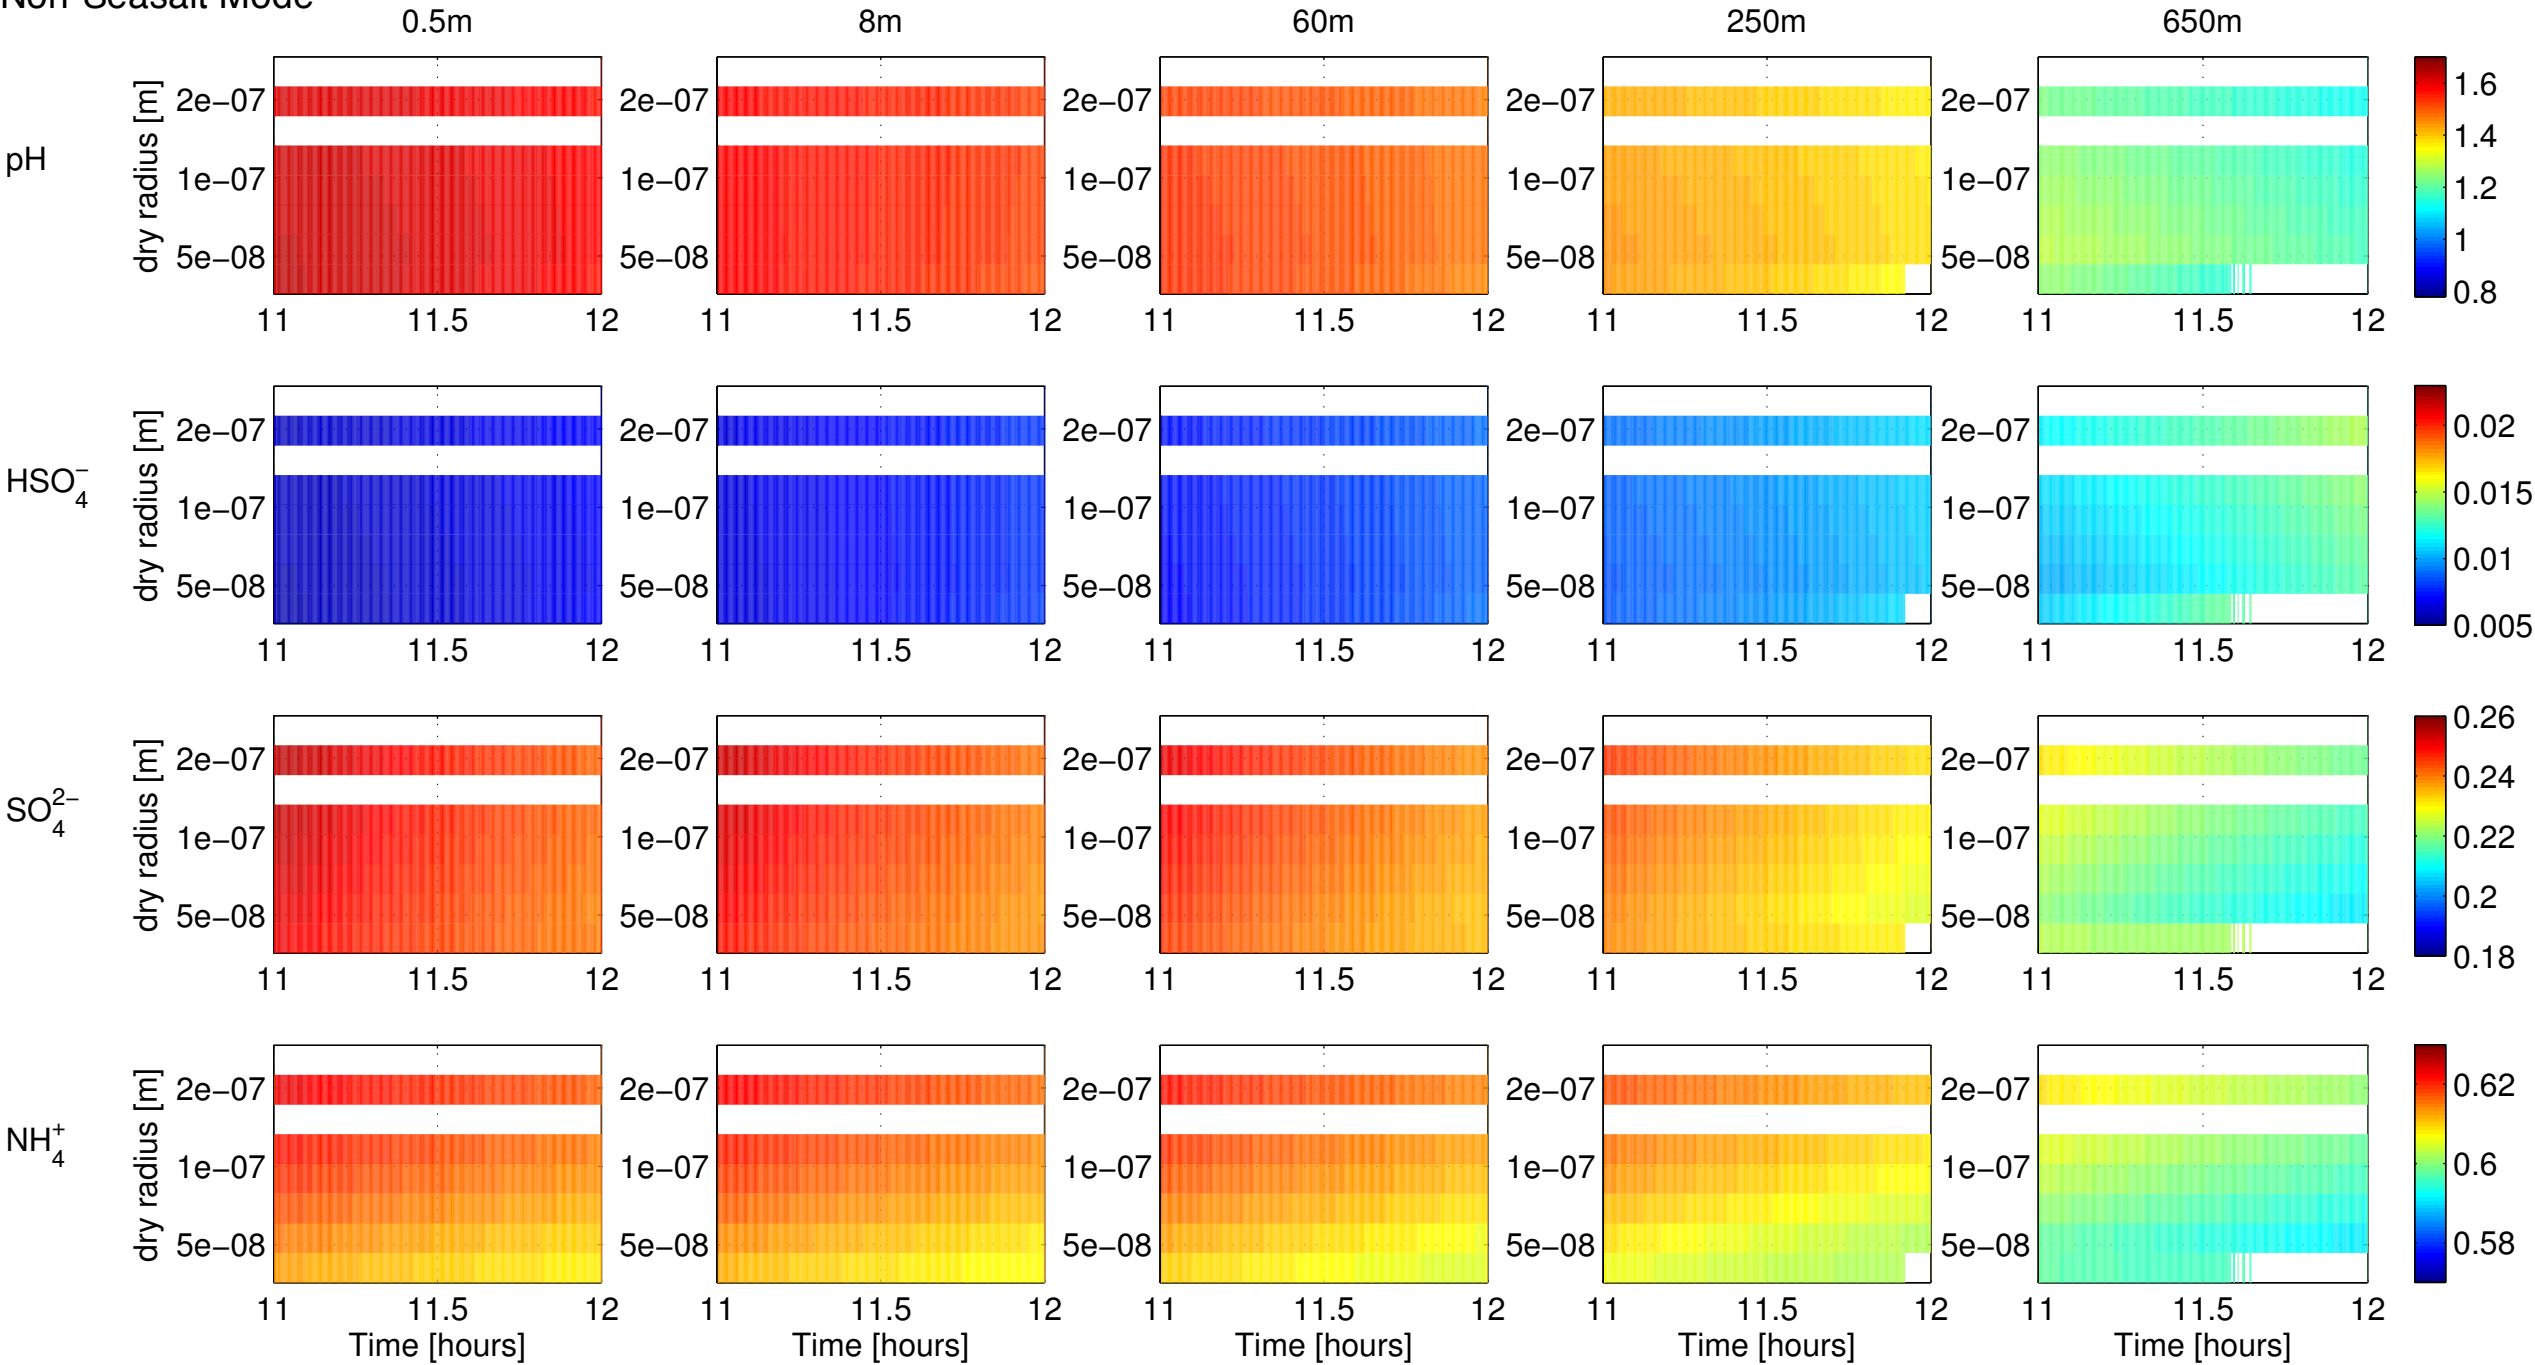

## Non-Seasalt Mode

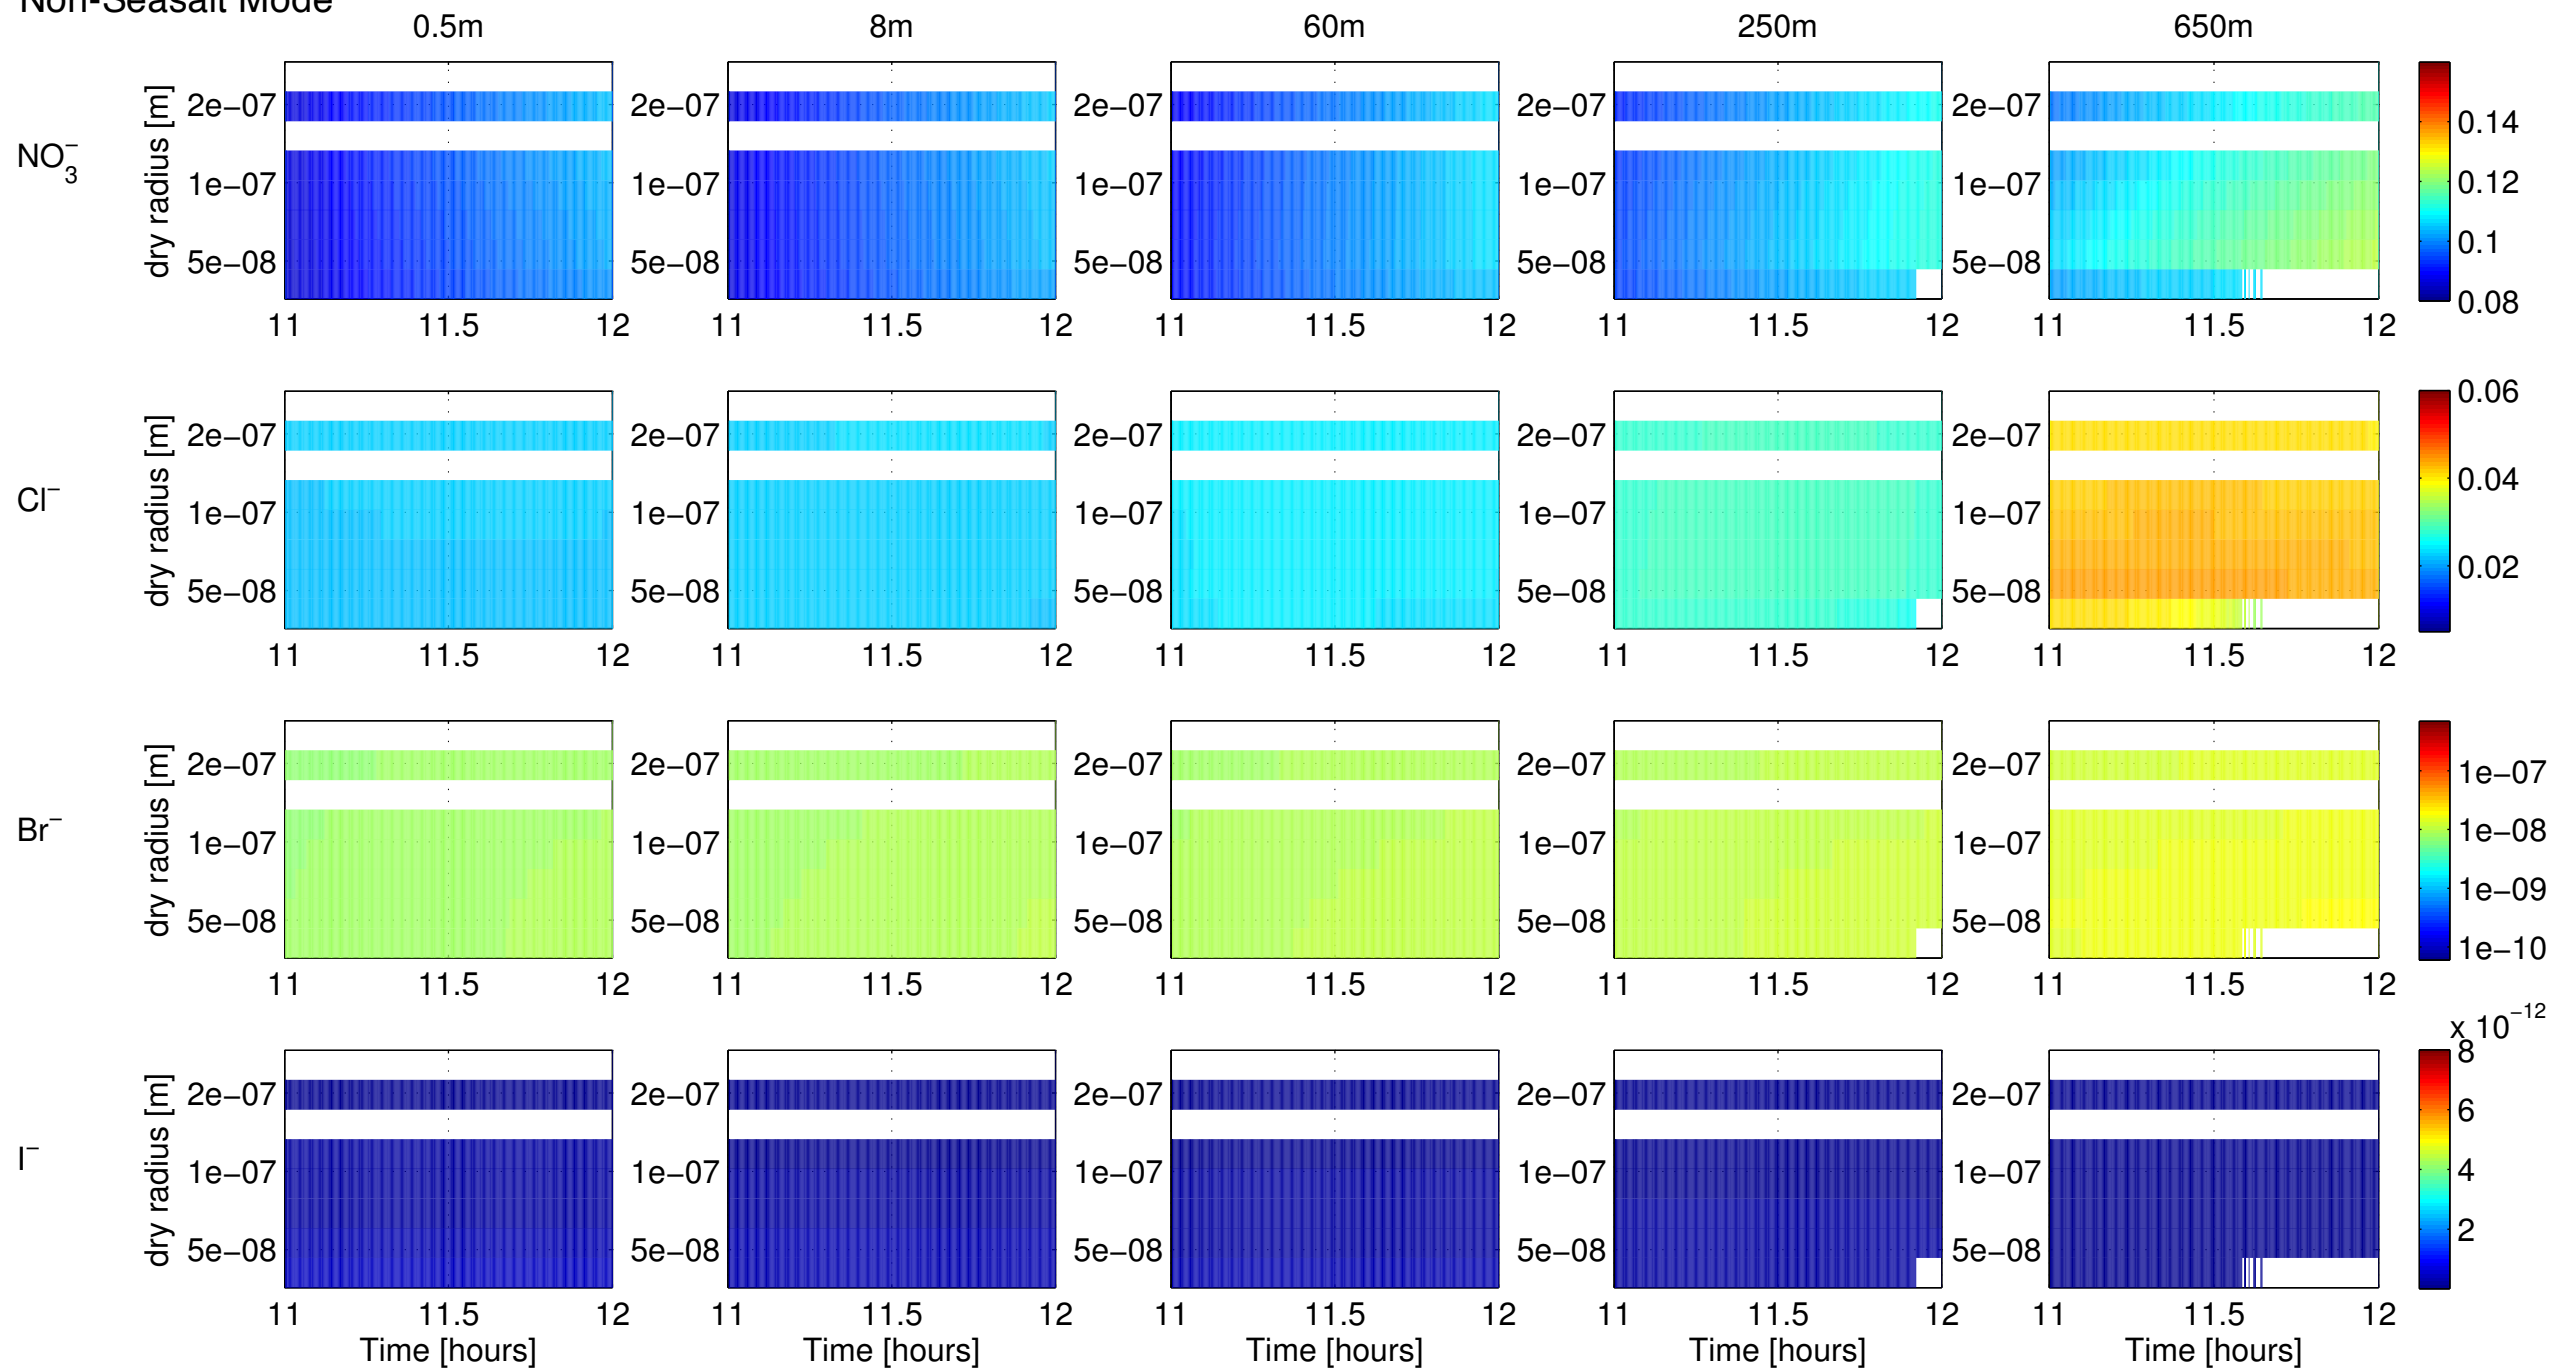

Supplement: Supplementary file 1 [file acp-11-979-2011-supplement.zip › aero-base_chem-high_tide.pdf]
