# Supplementary material for: Modelling multi-phase halogen chemistry in the coastal marine boundary layer: investigation of the relative importance of local chemistry vs. long-range transport
Source: Copernicus journal article supplement (doi:10.5194/acp-11-979-2011), 2011-02-02

I2 Recycling Scheme with Low Photolysis Rates, at Low Tide, with Second I2 Emission Scenario

pH, dry mole fraction and Cl<sup>-</sup>:Na<sup>+</sup> ratio for the  
seasalt and non-seasalt aerosol modes

# Seasalt Mode

0.5 m

8 m

60 m

250 m

650 m

pH

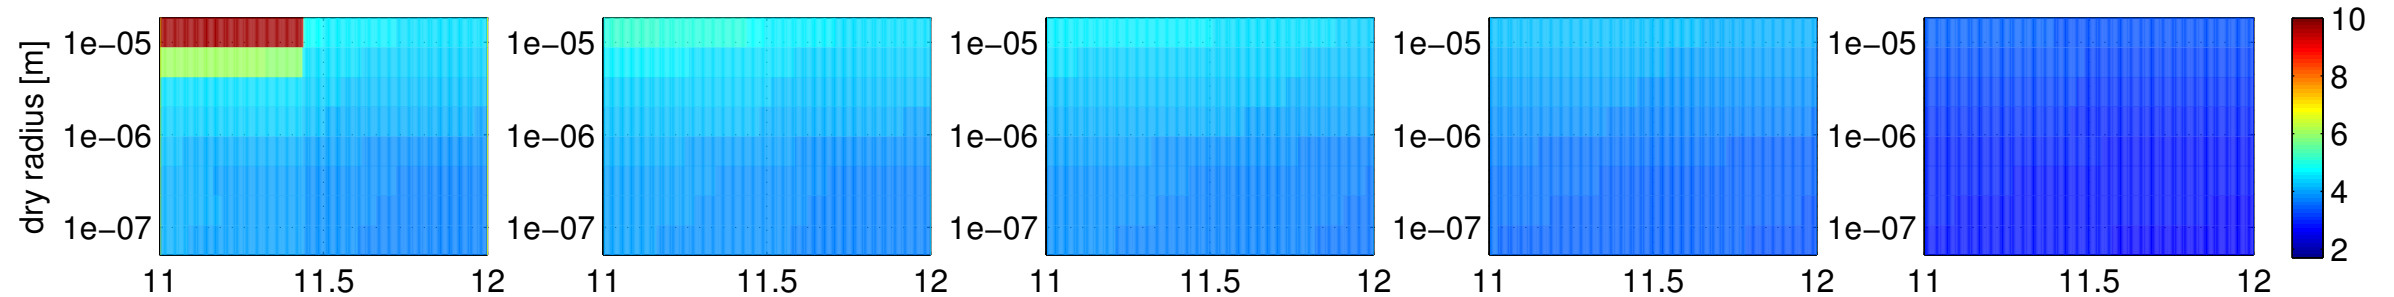

$\text{Na}^+$

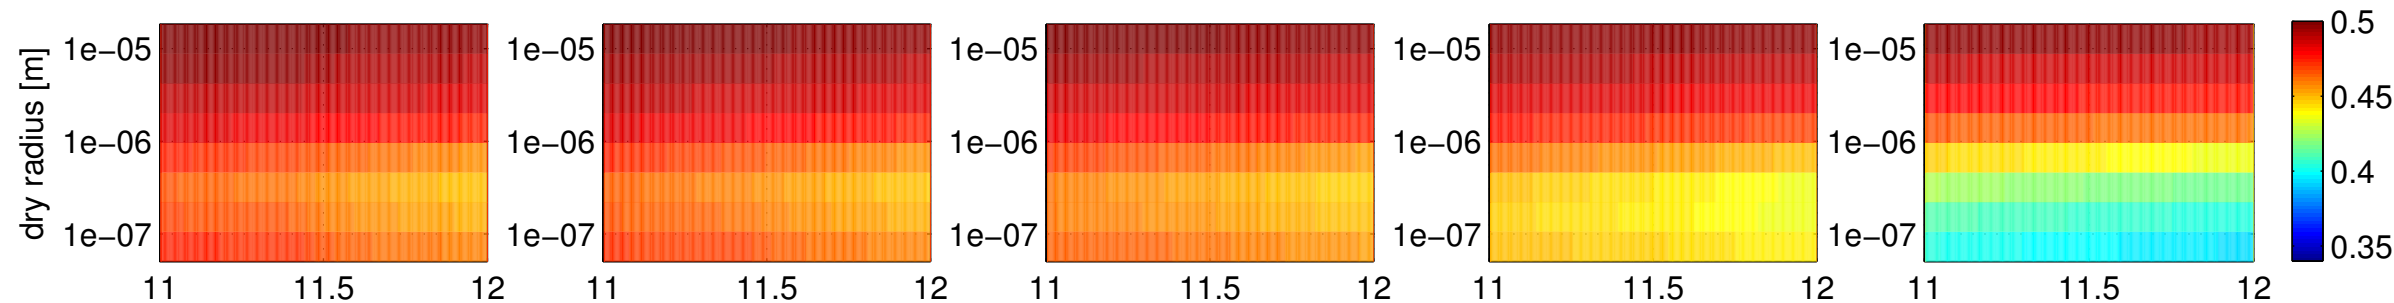

$\text{Cl}^-:\text{Na}^+$

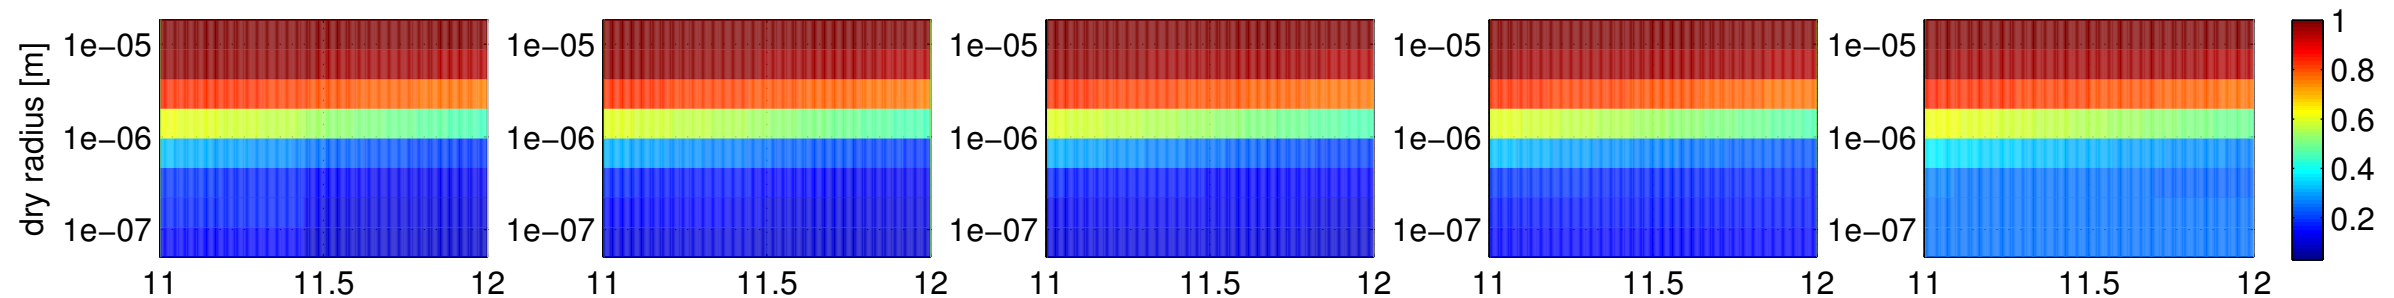

$\text{Br}^-$

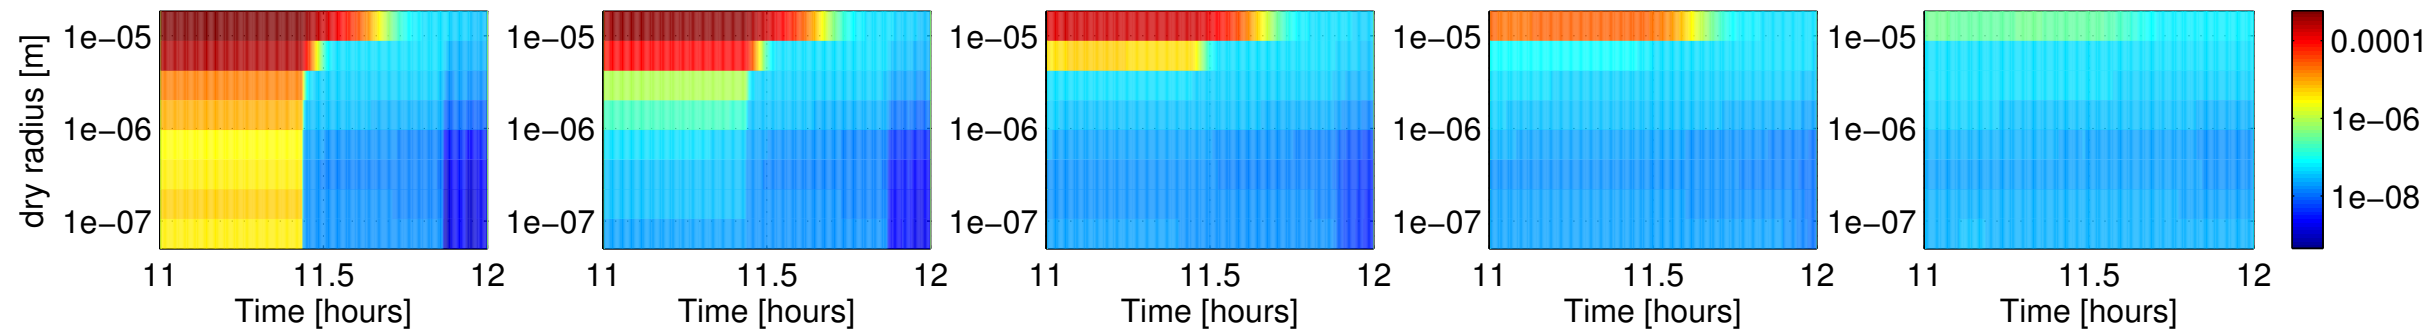

# Seasalt Mode

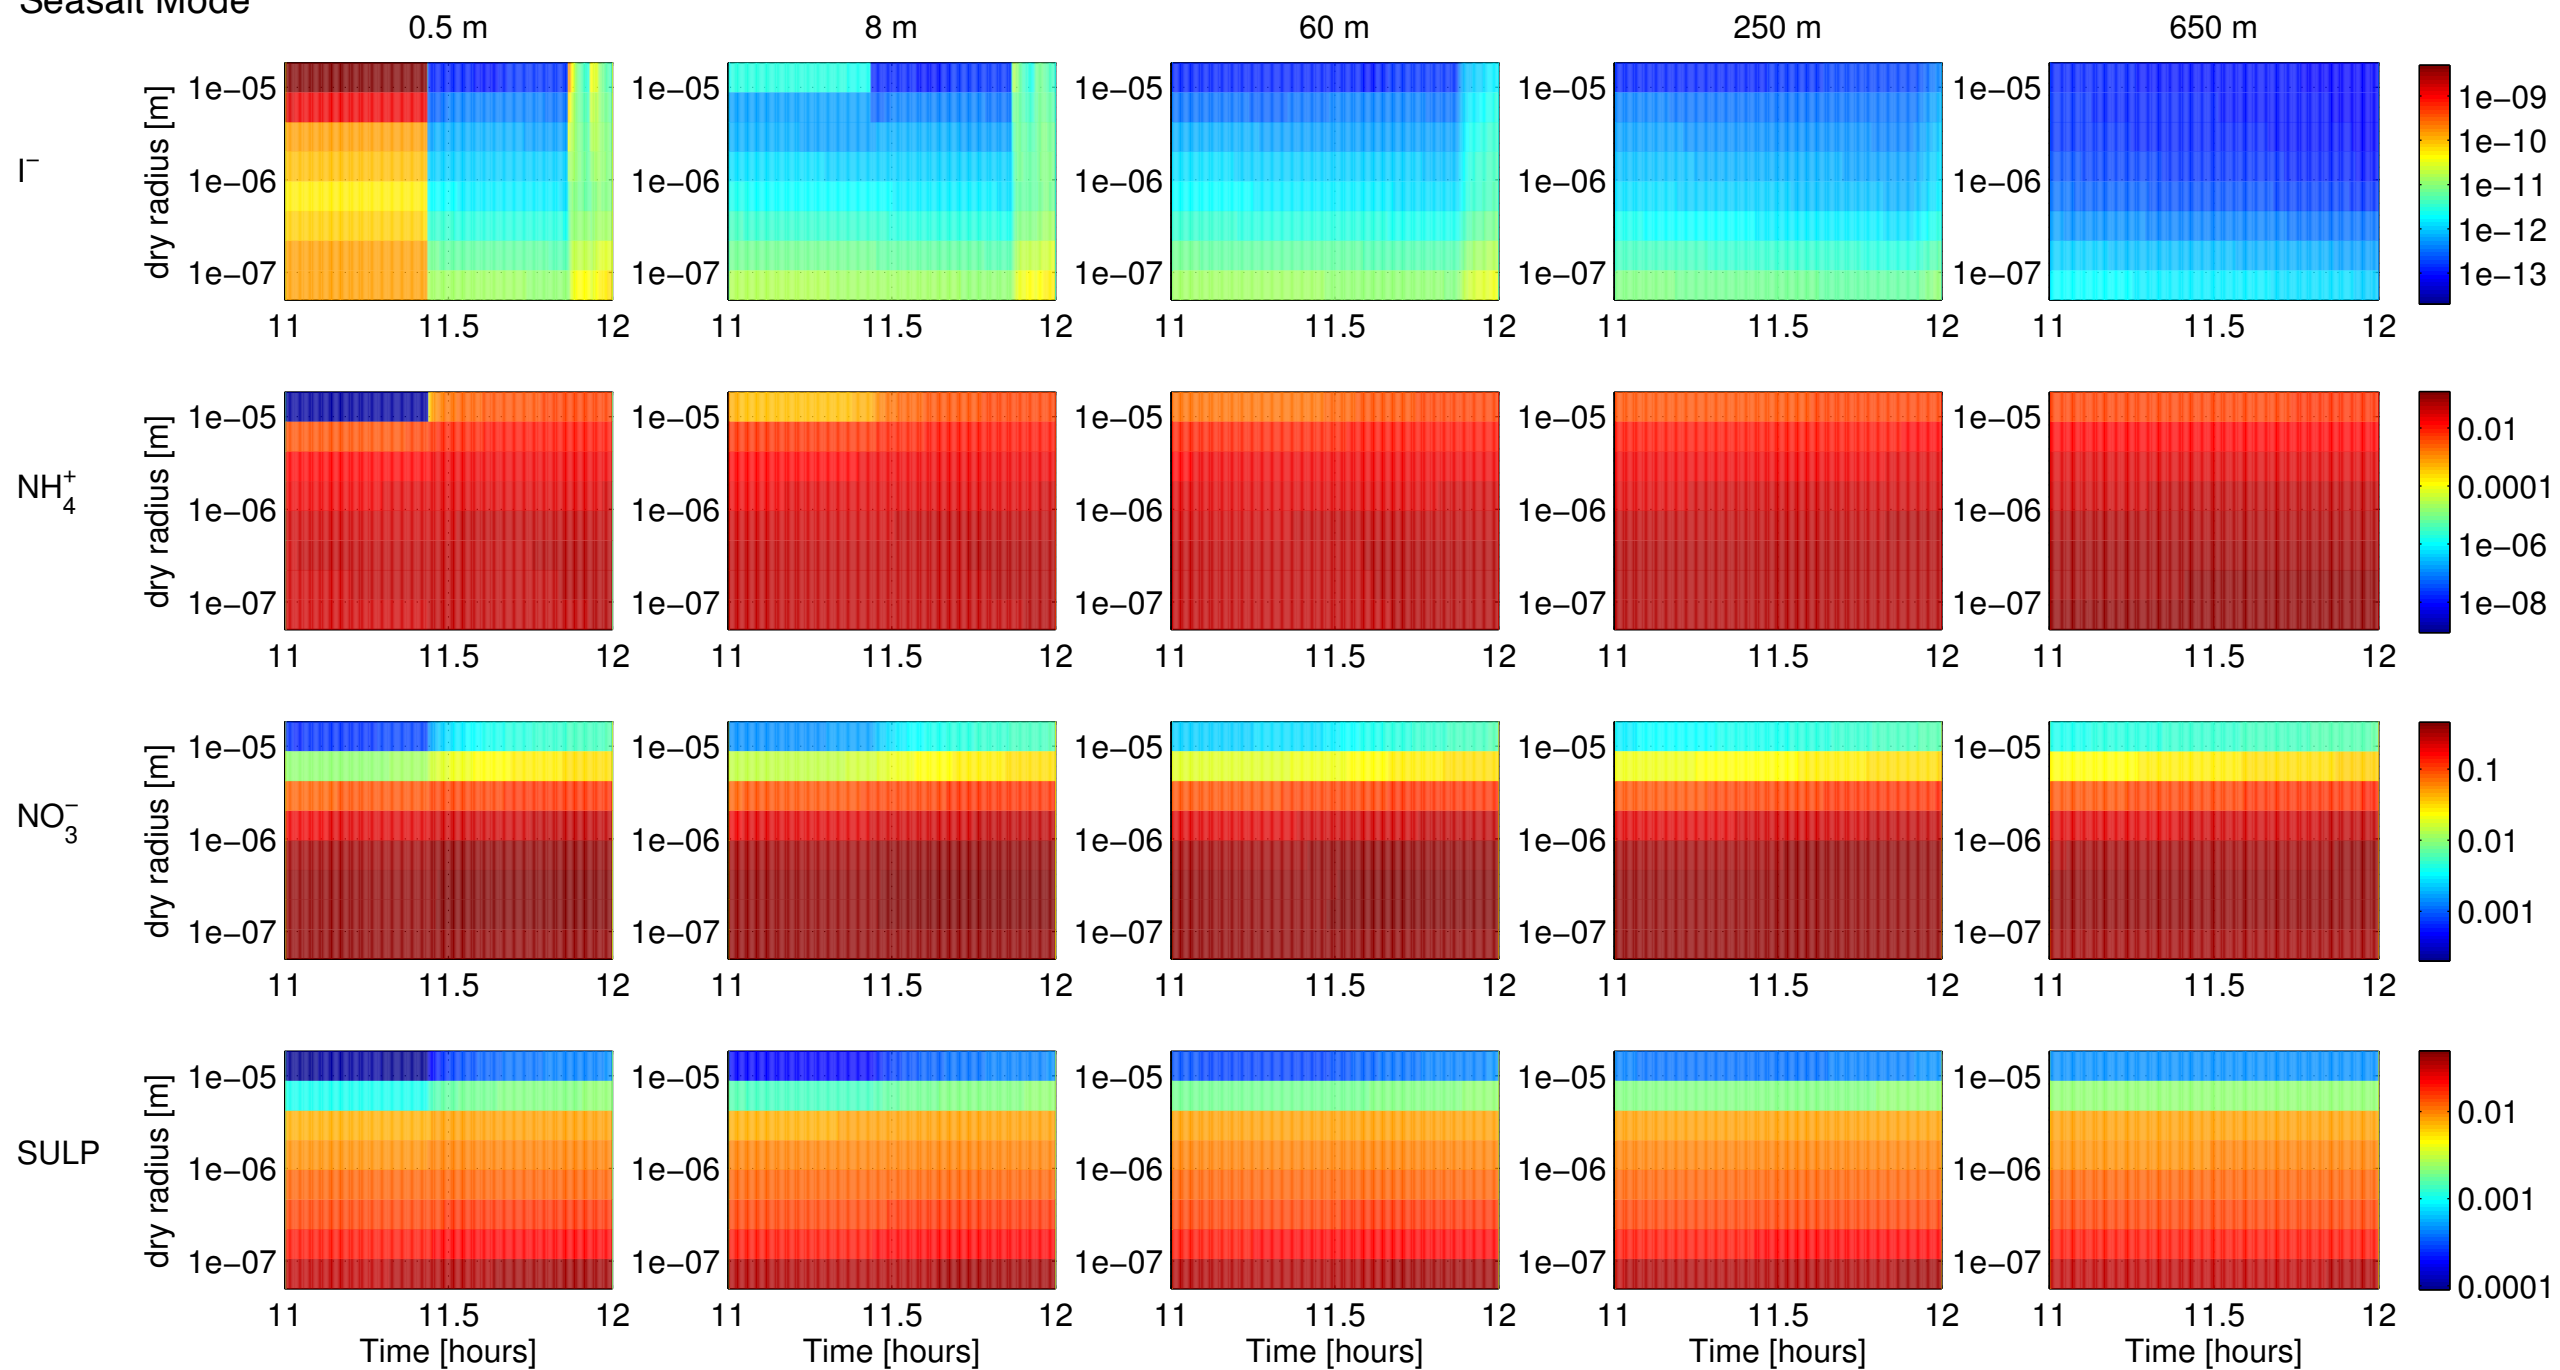

## Non-Seasalt Mode

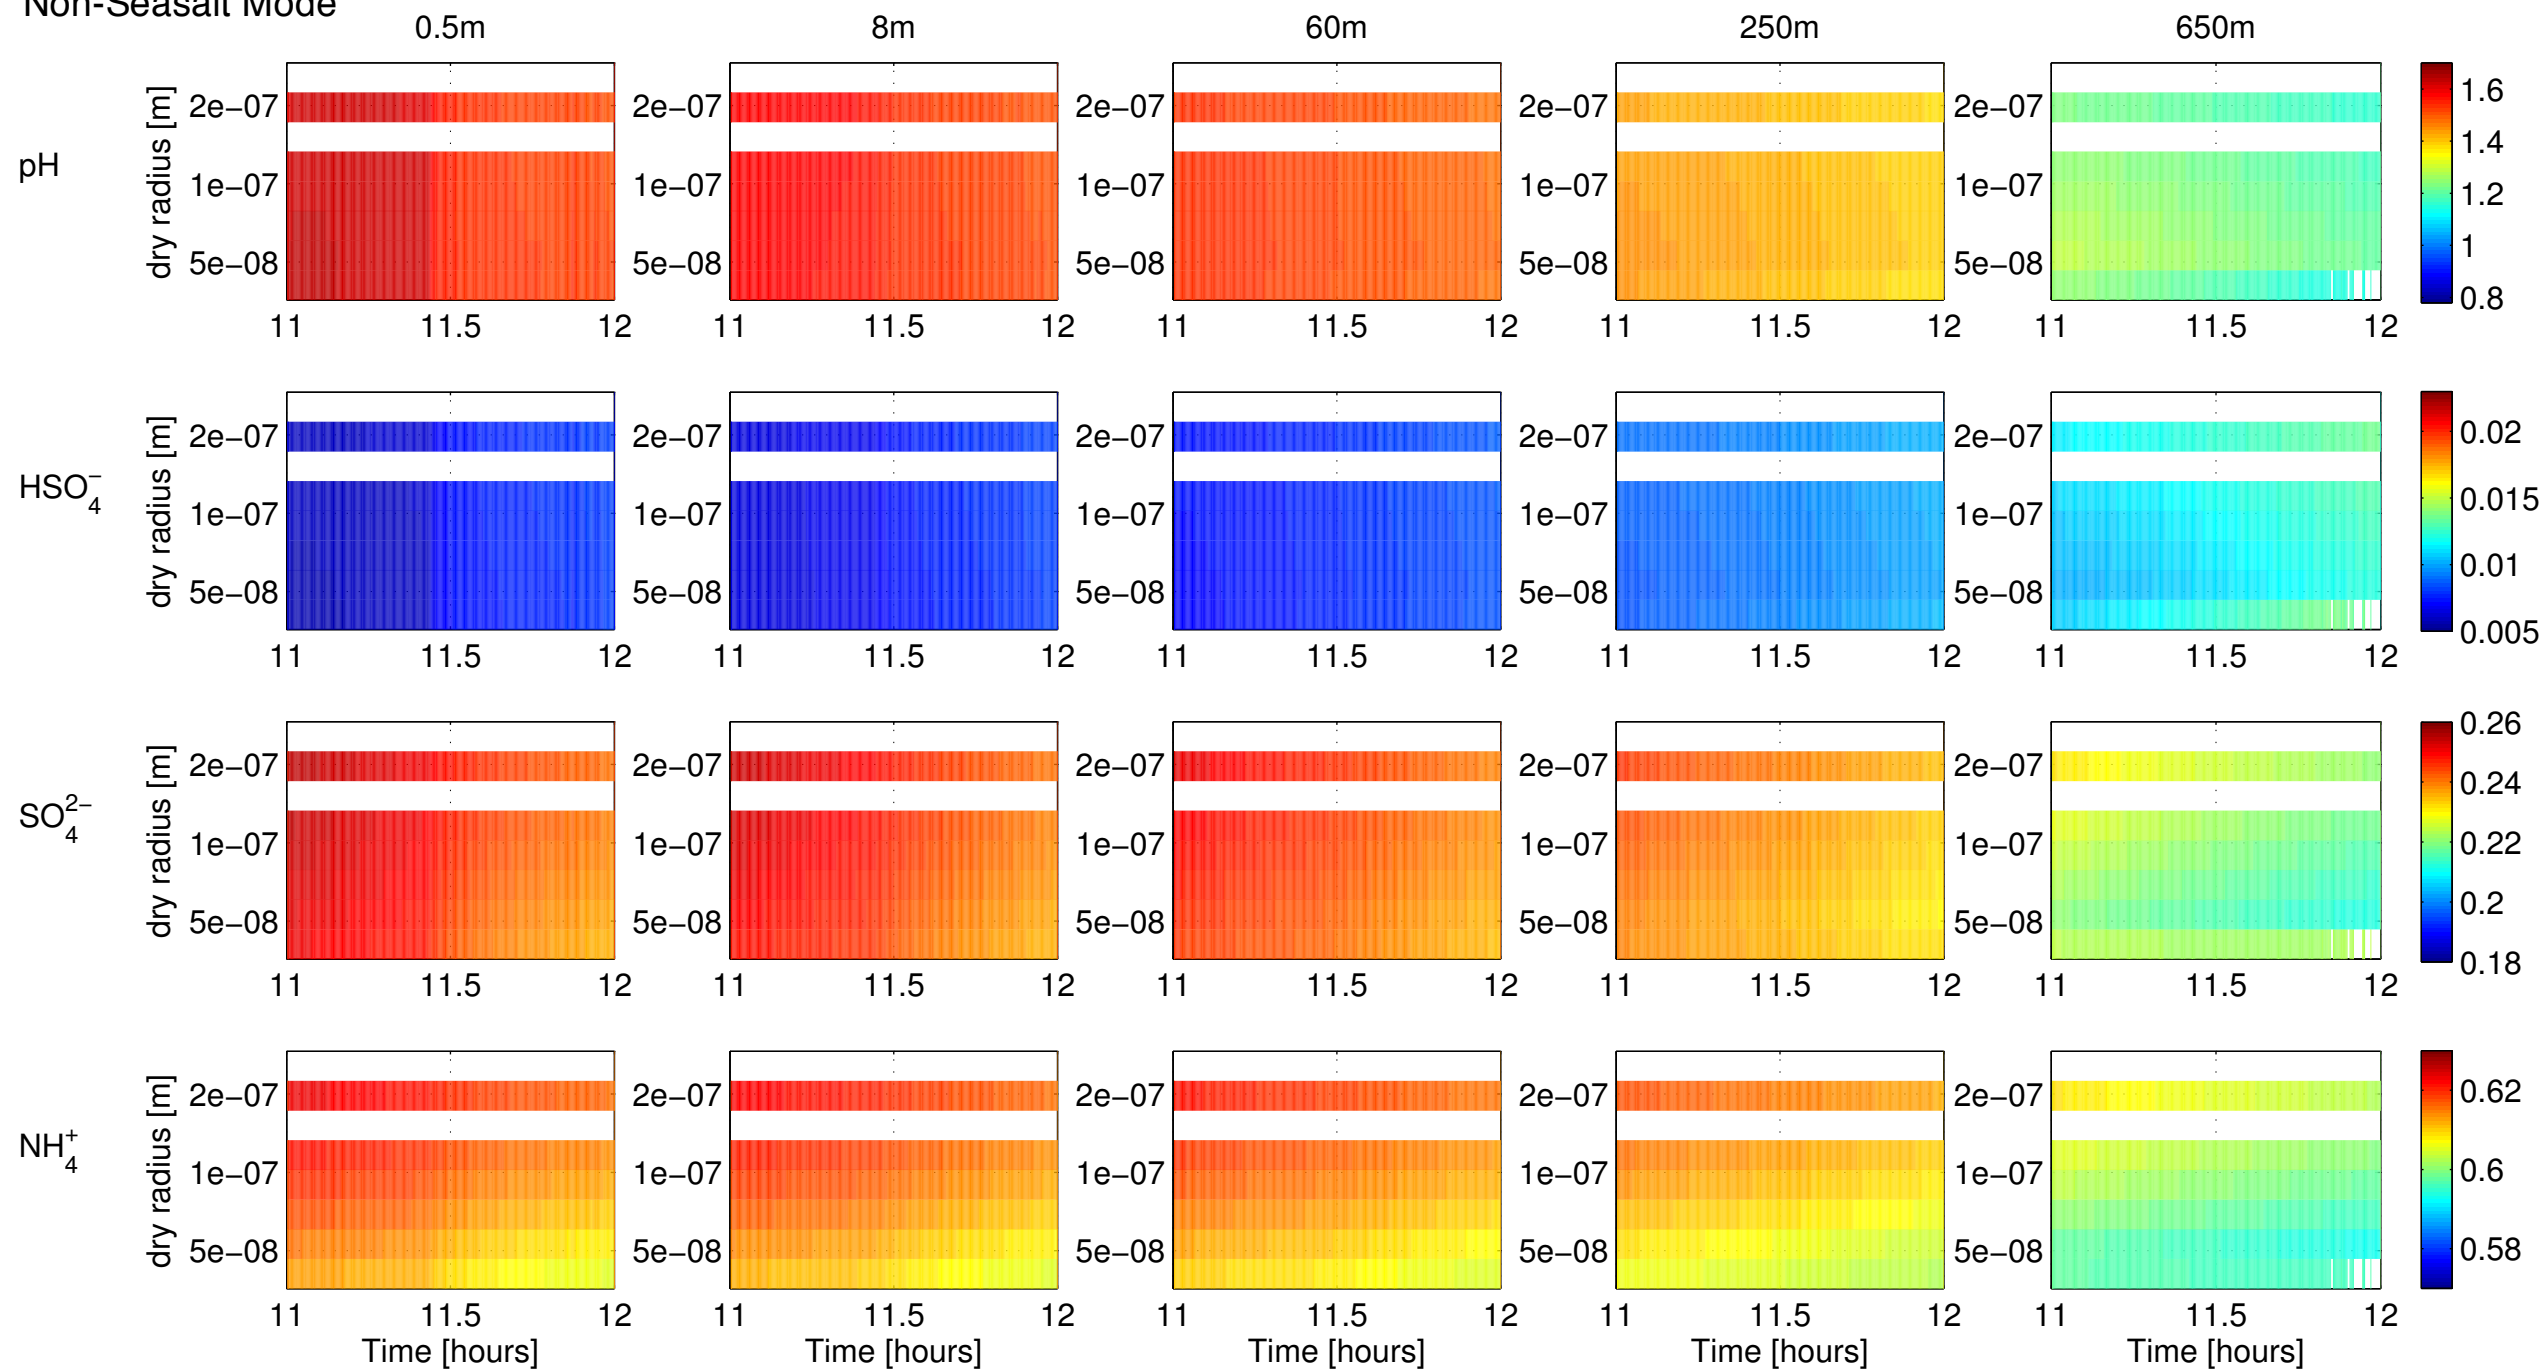

## Non-Seasalt Mode

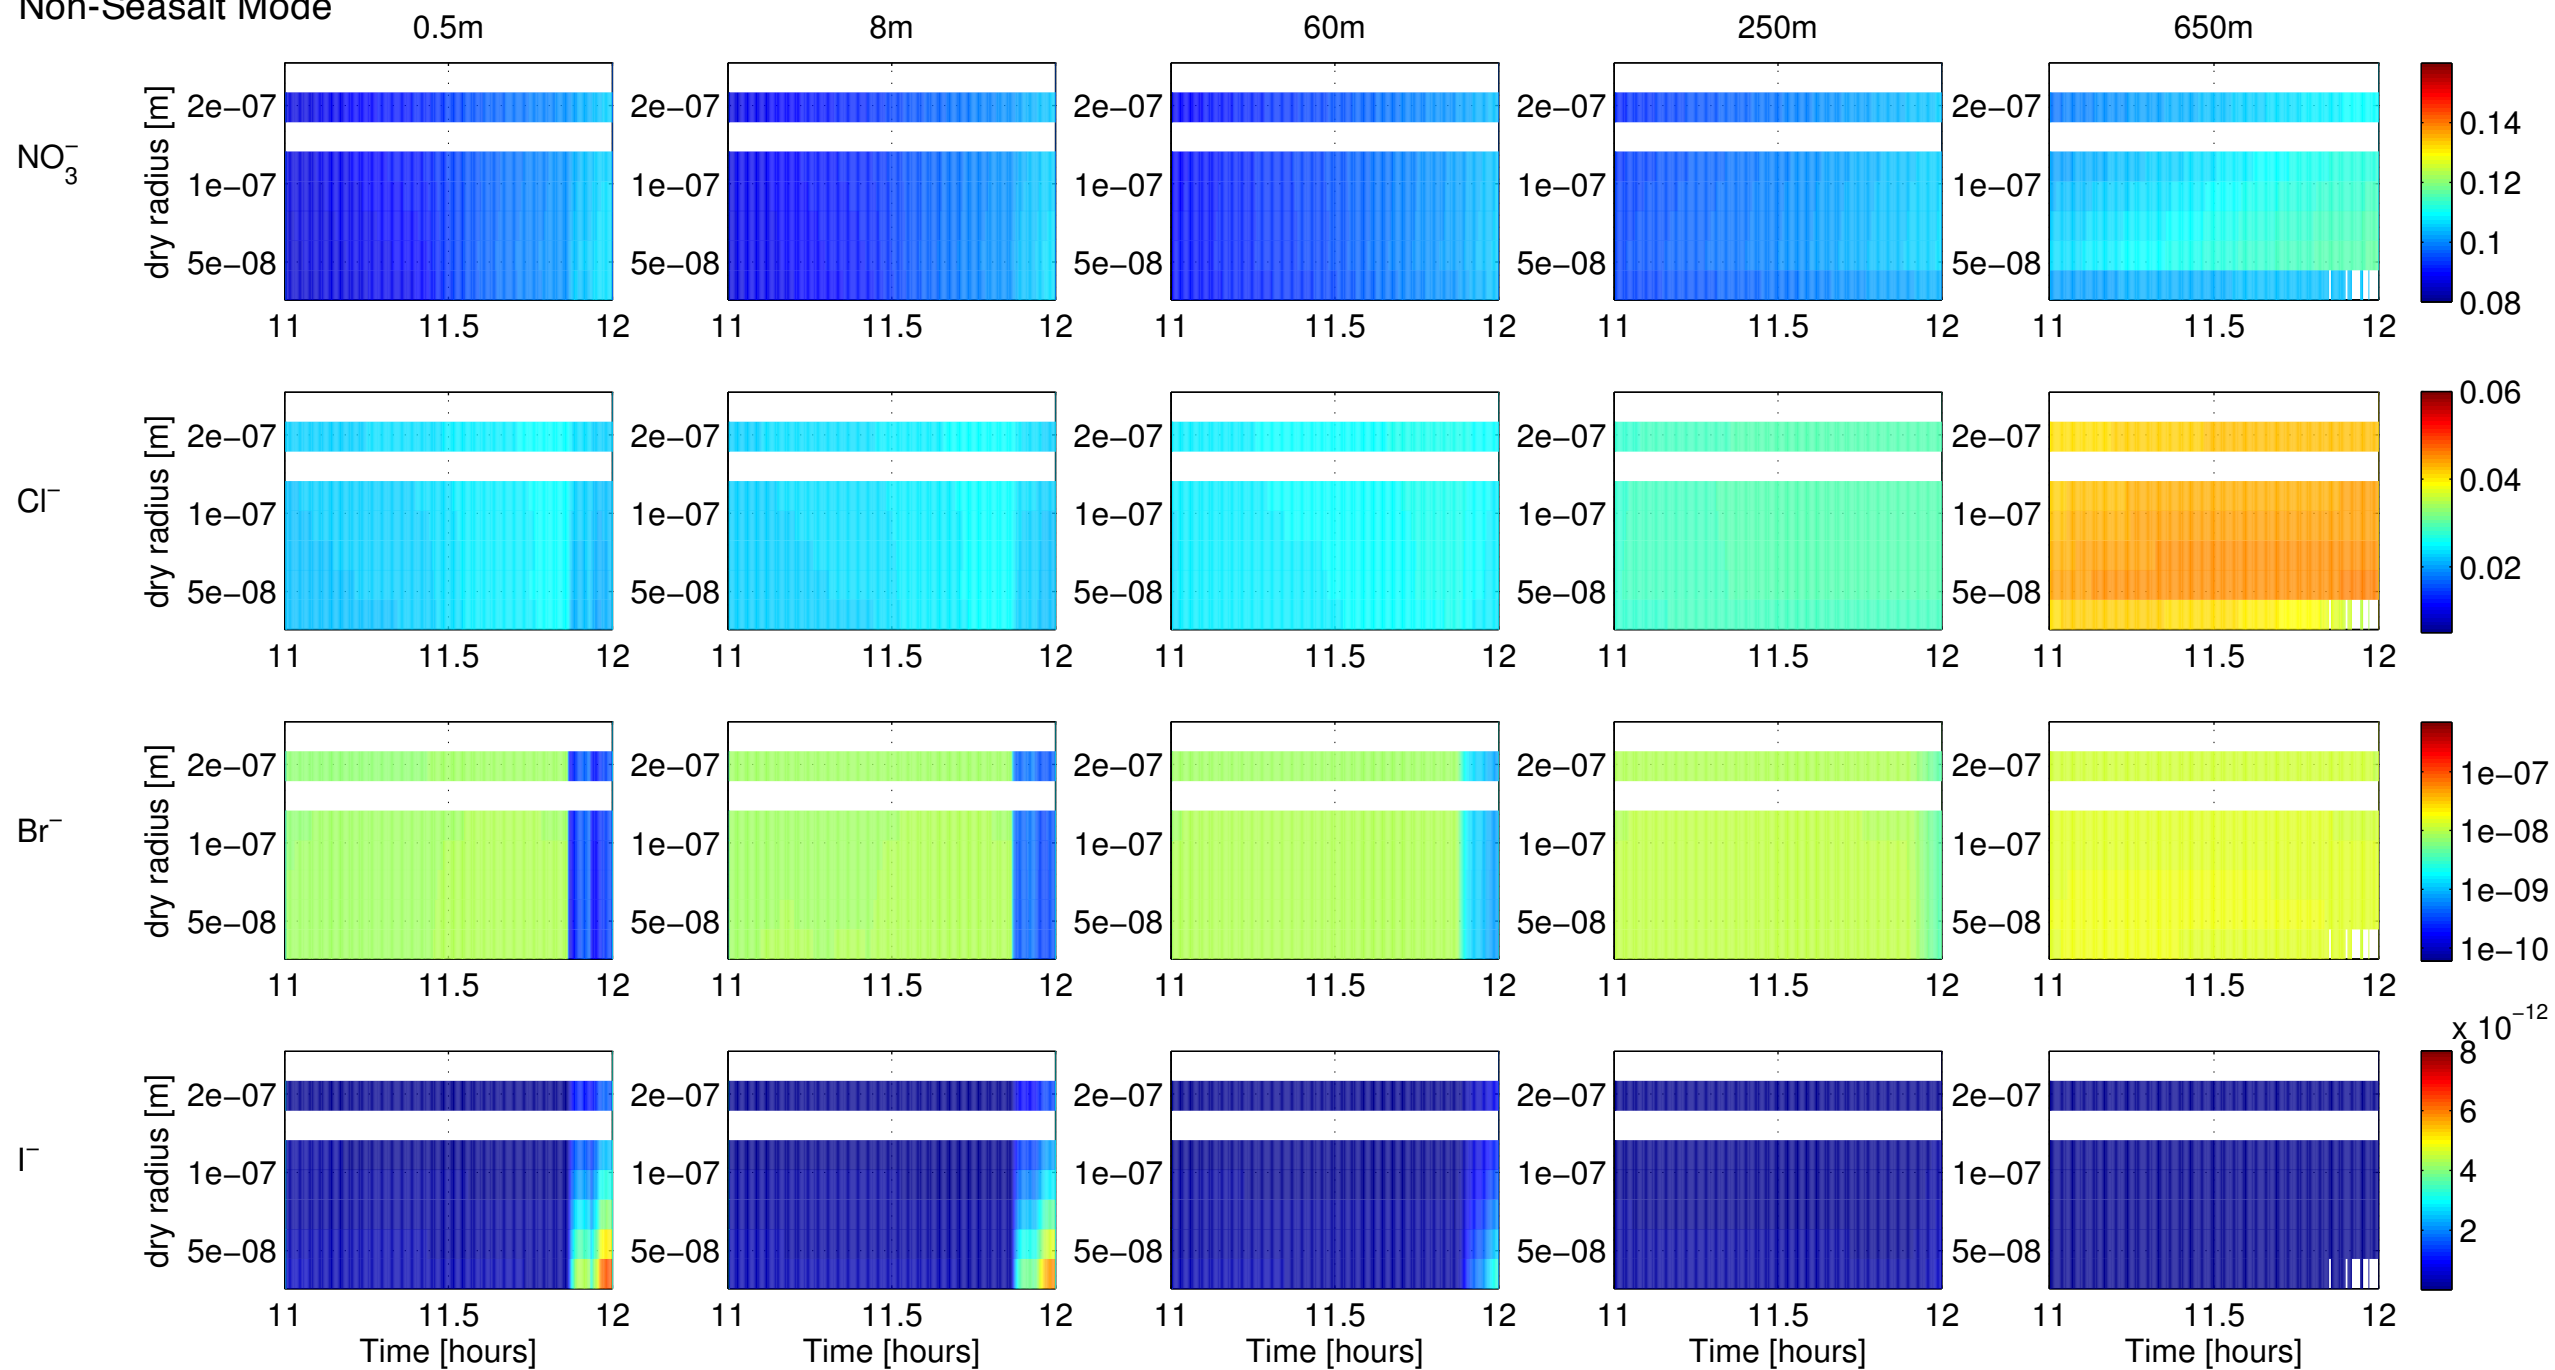

Supplement: Supplementary file 1 [file acp-11-979-2011-supplement.zip › aero-I2recycle-low_photo-low_tide-2nd_I2_emissions.pdf]
