# Supplementary material for: Modelling multi-phase halogen chemistry in the coastal marine boundary layer: investigation of the relative importance of local chemistry vs. long-range transport
Source: Copernicus journal article supplement (doi:10.5194/acp-11-979-2011), 2011-02-02

## Model Spin-up Prognostics

Total dry volumes for each aerosol mode, and O<sub>3</sub> and NO<sub>x</sub> mixing ratios, through the model spin up period. Midnight is at -2, -1, and 0 days. Roscoff is at 0.5 days. Black, red, blue, green, purple, and grey lines represent dry volume or mixing ratio at heights of 0.5, 8, 60, 250, 650 and 840 metres.

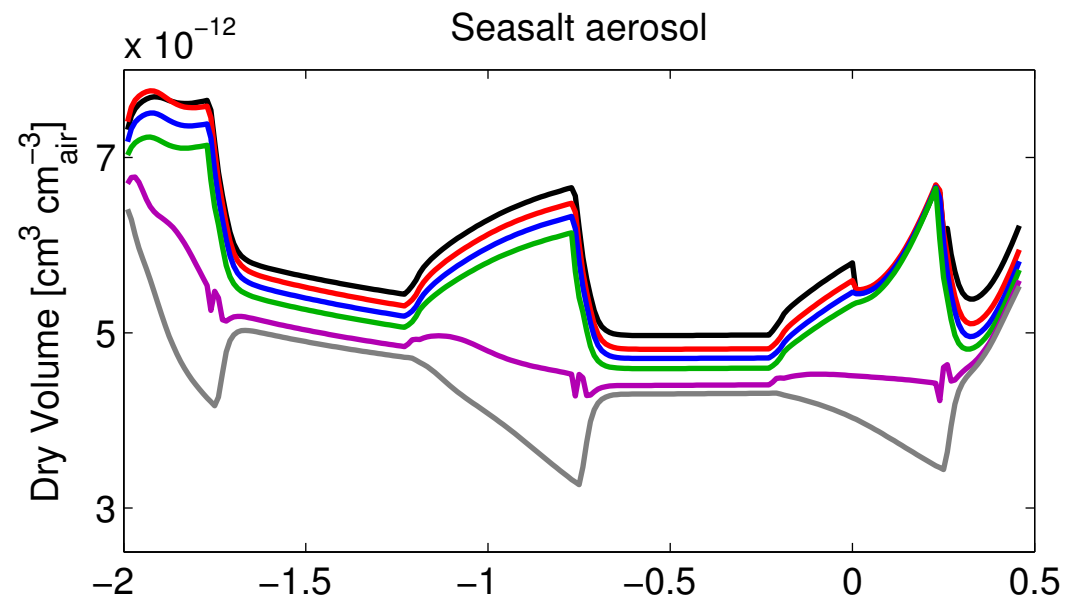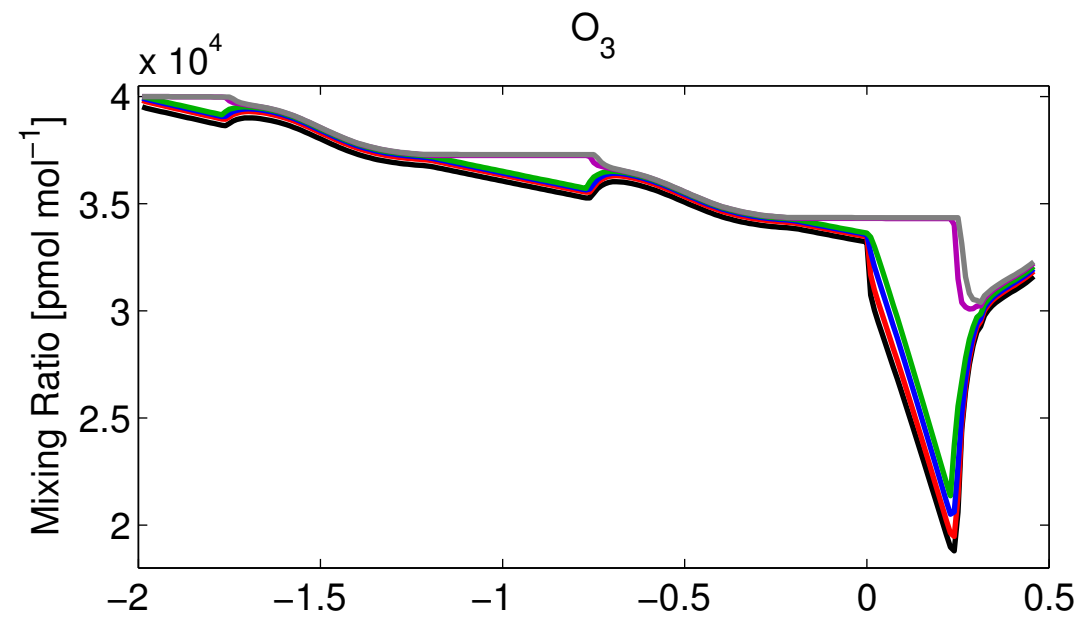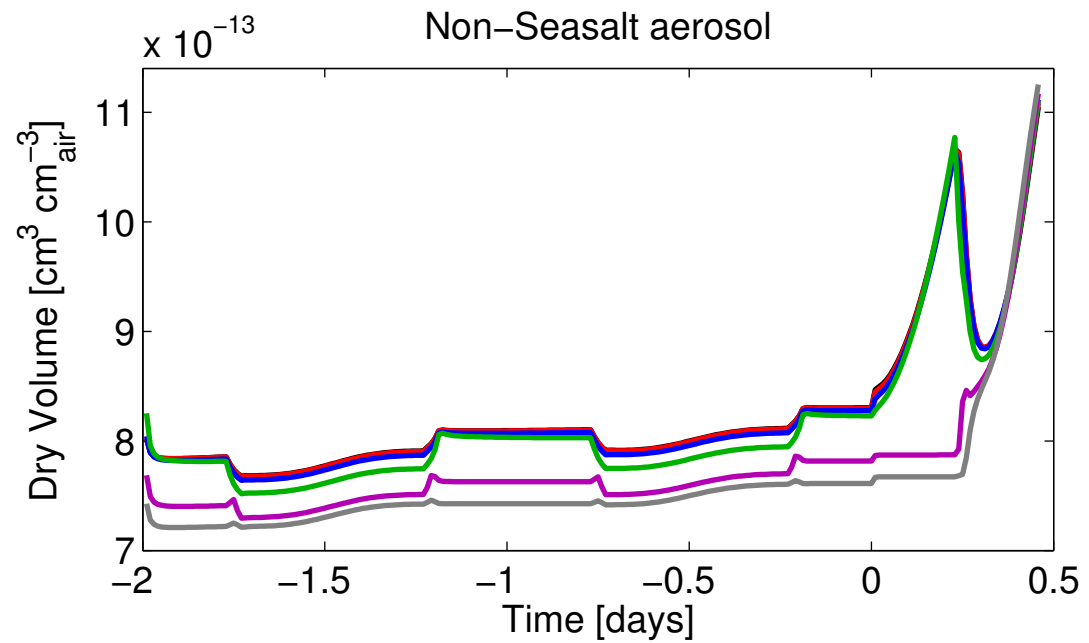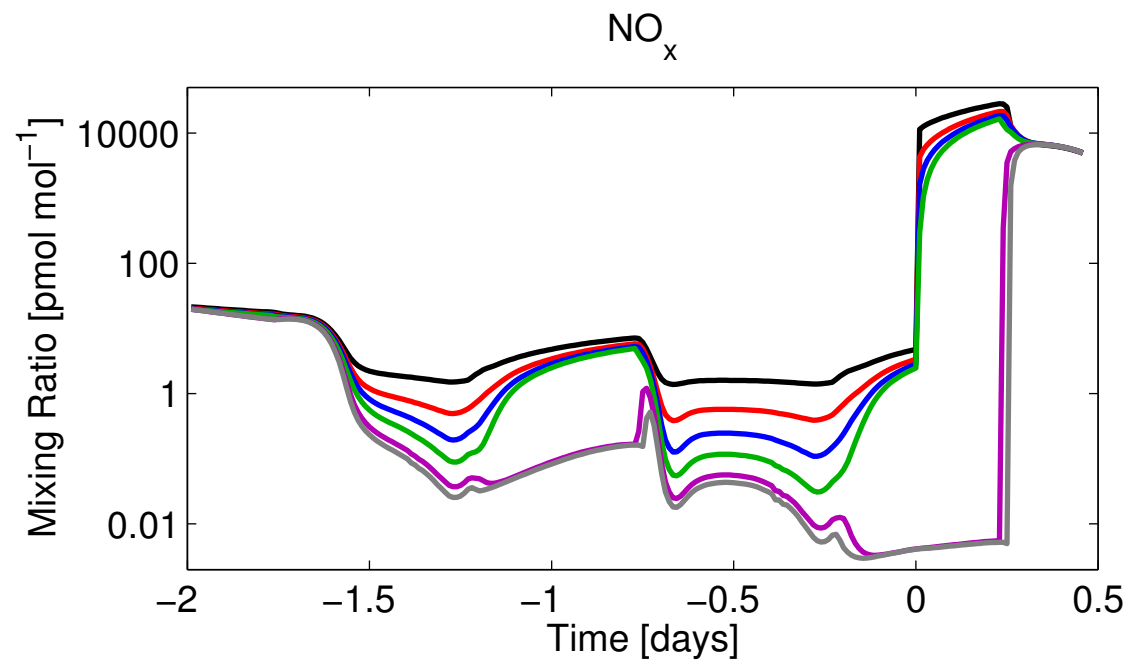

Supplement: Supplementary file 1 [file acp-11-979-2011-supplement.zip › atlantic_channel-prognositics.pdf]
