# Supplementary material for: Modelling multi-phase halogen chemistry in the coastal marine boundary layer: investigation of the relative importance of local chemistry vs. long-range transport
Source: Copernicus journal article supplement (doi:10.5194/acp-11-979-2011), 2011-02-02
Supplement: Supplementary file 1 [file acp-11-979-2011-supplement.zip › column_data.txt]

# column level boundary data (metres)
COLUMN
0.0000000E+00  0.1000000E+01  0.3000000E+01  0.6000000E+01  0.1000000E+02  0.1500000E+02  0.2500000E+02  0.4000000E+02  0.8000000E+02  0.1200000E+03  0.1600000E+03  0.2200000E+03  0.2800000E+03  0.3600000E+03  0.4600000E+03  0.5400000E+03  0.6200000E+03  0.6800000E+03  0.7400000E+03  0.7800000E+03  0.8200000E+03  0.8600000E+03  0.9000000E+03  0.9400000E+03  0.9700000E+03  0.1000000E+04


# Trajectory column data:
# time 		= time for data (seconds)       (at centre of each level)
# temp		= temperature (Kelvin)          (at centre of each level)
# press		= pressure (mbar)               (at centre of each level)
# kprof		= eddy diffusivity (m^2 s^-1)   (at edges of each level)
CTRJ
TIME	0d3
TEMP      0.2839951E+03  0.2839805E+03  0.2839561E+03  0.2839219E+03  0.2838780E+03  0.2838048E+03  0.2836828E+03  0.2834144E+03  0.2830240E+03  0.2826336E+03  0.2821456E+03  0.2810057E+03  0.2810985E+03  0.2812178E+03  0.2813371E+03  0.2814432E+03  0.2815360E+03  0.2816155E+03  0.2816818E+03  0.2817349E+03  0.2817879E+03  0.2818409E+03  0.2818940E+03  0.2819403E+03  0.2819801E+03
PRESS     0.1019943E+04  0.1019774E+04  0.1019492E+04  0.1019096E+04  0.1018588E+04  0.1017740E+04  0.1016328E+04  0.1013220E+04  0.1008700E+04  0.1004180E+04  0.9985300E+03  0.9917500E+03  0.9838400E+03  0.9736700E+03  0.9635000E+03  0.9544600E+03  0.9465500E+03  0.9397700E+03  0.9341200E+03  0.9296000E+03  0.9250800E+03  0.9205600E+03  0.9160400E+03  0.9120850E+03  0.9086950E+03
KPROF     0.0000000E+00  0.2028995E+00  0.7603852E+00  0.1616752E+01  0.2713583E+01  0.4071959E+01  0.6789314E+01  0.1050585E+02  0.1811353E+02  0.2282305E+02  0.2463440E+02  0.2191737E+02  0.1267947E+02  0.0000000E+00  0.0000000E+00  0.0000000E+00  0.0000000E+00  0.0000000E+00  0.0000000E+00  0.0000000E+00  0.0000000E+00  0.0000000E+00  0.0000000E+00  0.0000000E+00  0.0000000E+00  0.0000000E+00
TIME	1.8d4
TEMP      0.2839951E+03  0.2839805E+03  0.2839561E+03  0.2839219E+03  0.2838780E+03  0.2838048E+03  0.2836828E+03  0.2834144E+03  0.2830240E+03  0.2826336E+03  0.2821456E+03  0.2810057E+03  0.2810985E+03  0.2812178E+03  0.2813371E+03  0.2814432E+03  0.2815360E+03  0.2816155E+03  0.2816818E+03  0.2817349E+03  0.2817879E+03  0.2818409E+03  0.2818940E+03  0.2819403E+03  0.2819801E+03
PRESS     0.1019943E+04  0.1019774E+04  0.1019492E+04  0.1019096E+04  0.1018588E+04  0.1017740E+04  0.1016328E+04  0.1013220E+04  0.1008700E+04  0.1004180E+04  0.9985300E+03  0.9917500E+03  0.9838400E+03  0.9736700E+03  0.9635000E+03  0.9544600E+03  0.9465500E+03  0.9397700E+03  0.9341200E+03  0.9296000E+03  0.9250800E+03  0.9205600E+03  0.9160400E+03  0.9120850E+03  0.9086950E+03
KPROF     0.0000000E+00  0.2028995E+00  0.7603852E+00  0.1616752E+01  0.2713583E+01  0.4071959E+01  0.6789314E+01  0.1050585E+02  0.1811353E+02  0.2282305E+02  0.2463440E+02  0.2191737E+02  0.1267947E+02  0.0000000E+00  0.0000000E+00  0.0000000E+00  0.0000000E+00  0.0000000E+00  0.0000000E+00  0.0000000E+00  0.0000000E+00  0.0000000E+00  0.0000000E+00  0.0000000E+00  0.0000000E+00  0.0000000E+00
TIME	1.98d4
TEMP      0.2839951E+03  0.2839805E+03  0.2839561E+03  0.2839219E+03  0.2838780E+03  0.2838048E+03  0.2836828E+03  0.2834144E+03  0.2830240E+03  0.2826336E+03  0.2821456E+03  0.2810057E+03  0.2810985E+03  0.2812178E+03  0.2813371E+03  0.2814432E+03  0.2815360E+03  0.2816155E+03  0.2816818E+03  0.2817349E+03  0.2817879E+03  0.2818409E+03  0.2818940E+03  0.2819403E+03  0.2819801E+03
PRESS     0.1019943E+04  0.1019774E+04  0.1019492E+04  0.1019096E+04  0.1018588E+04  0.1017740E+04  0.1016328E+04  0.1013220E+04  0.1008700E+04  0.1004180E+04  0.9985300E+03  0.9917500E+03  0.9838400E+03  0.9736700E+03  0.9635000E+03  0.9544600E+03  0.9465500E+03  0.9397700E+03  0.9341200E+03  0.9296000E+03  0.9250800E+03  0.9205600E+03  0.9160400E+03  0.9120850E+03  0.9086950E+03
KPROF     0.0000000E+00  0.2028995E+00  0.7603852E+00  0.1616752E+01  0.2713583E+01  0.4071959E+01  0.6789314E+01  0.1050585E+02  0.1811353E+02  0.2282305E+02  0.2463440E+02  0.2191737E+02  0.1267947E+02  0.0000000E+00  0.0000000E+00  0.0000000E+00  0.0000000E+00  0.0000000E+00  0.0000000E+00  0.0000000E+00  0.0000000E+00  0.0000000E+00  0.0000000E+00  0.0000000E+00  0.0000000E+00  0.0000000E+00
TIME	2.16d4
TEMP      0.2869951E+03  0.2869805E+03  0.2869561E+03  0.2869219E+03  0.2868780E+03  0.2868048E+03  0.2866828E+03  0.2864144E+03  0.2860240E+03  0.2856336E+03  0.2851456E+03  0.2845600E+03  0.2838768E+03  0.2829984E+03  0.2821200E+03  0.2813392E+03  0.2806560E+03  0.2808864E+03  0.2810784E+03  0.2812320E+03  0.2813856E+03  0.2815392E+03  0.2816928E+03  0.2818272E+03  0.2819424E+03
PRESS     0.1019943E+04  0.1019774E+04  0.1019492E+04  0.1019096E+04  0.1018588E+04  0.1017740E+04  0.1016328E+04  0.1013220E+04  0.1008700E+04  0.1004180E+04  0.9985300E+03  0.9917500E+03  0.9838400E+03  0.9736700E+03  0.9635000E+03  0.9544600E+03  0.9465500E+03  0.9397700E+03  0.9341200E+03  0.9296000E+03  0.9250800E+03  0.9205600E+03  0.9160400E+03  0.9120850E+03  0.9086950E+03
KPROF     0.0000000E+00  0.2030303E+00  0.7608588E+00  0.1617759E+01  0.2715279E+01  0.4074467E+01  0.6793542E+01  0.1087482E+02  0.2124773E+02  0.2986393E+02  0.3714170E+02  0.4554877E+02  0.5094436E+02  0.5345393E+02  0.4906217E+02  0.3952579E+02  0.2463565E+02  0.9954637E+01  0.0000000E+00  0.0000000E+00  0.0000000E+00  0.0000000E+00  0.0000000E+00  0.0000000E+00  0.0000000E+00  0.0000000E+00
TIME	2.34d4
TEMP      0.2899951E+03  0.2899805E+03  0.2899561E+03  0.2899219E+03  0.2898780E+03  0.2898048E+03  0.2896828E+03  0.2894144E+03  0.2890240E+03  0.2886336E+03  0.2881456E+03  0.2875600E+03  0.2868768E+03  0.2859984E+03  0.2851200E+03  0.2843392E+03  0.2836560E+03  0.2830704E+03  0.2825824E+03  0.2821920E+03  0.2818016E+03  0.2810592E+03  0.2813728E+03  0.2816472E+03  0.2818824E+03
PRESS     0.1019943E+04  0.1019774E+04  0.1019492E+04  0.1019096E+04  0.1018588E+04  0.1017740E+04  0.1016328E+04  0.1013220E+04  0.1008700E+04  0.1004180E+04  0.9985300E+03  0.9917500E+03  0.9838400E+03  0.9736700E+03  0.9635000E+03  0.9544600E+03  0.9465500E+03  0.9397700E+03  0.9341200E+03  0.9296000E+03  0.9250800E+03  0.9205600E+03  0.9160400E+03  0.9120850E+03  0.9086950E+03
KPROF     0.0000000E+00  0.2031489E+00  0.7612796E+00  0.1618618E+01  0.2716717E+01  0.4076607E+01  0.6797104E+01  0.1088047E+02  0.2176094E+02  0.3155336E+02  0.4013684E+02  0.5119865E+02  0.6008437E+02  0.6854696E+02  0.7368494E+02  0.7344317E+02  0.6933276E+02  0.6371119E+02  0.5591352E+02  0.4950613E+02  0.4213160E+02  0.3378990E+02  0.2448106E+02  0.1420506E+02  0.5863379E+01  0.0000000E+00
TIME	2.52d4
TEMP      0.2899951E+03  0.2899805E+03  0.2899561E+03  0.2899219E+03  0.2898780E+03  0.2898048E+03  0.2896828E+03  0.2894144E+03  0.2890240E+03  0.2886336E+03  0.2881456E+03  0.2875600E+03  0.2868768E+03  0.2859984E+03  0.2851200E+03  0.2843392E+03  0.2836560E+03  0.2830704E+03  0.2825824E+03  0.2821920E+03  0.2818016E+03  0.2810592E+03  0.2813728E+03  0.2816472E+03  0.2818824E+03
PRESS     0.1019943E+04  0.1019774E+04  0.1019492E+04  0.1019096E+04  0.1018588E+04  0.1017740E+04  0.1016328E+04  0.1013220E+04  0.1008700E+04  0.1004180E+04  0.9985300E+03  0.9917500E+03  0.9838400E+03  0.9736700E+03  0.9635000E+03  0.9544600E+03  0.9465500E+03  0.9397700E+03  0.9341200E+03  0.9296000E+03  0.9250800E+03  0.9205600E+03  0.9160400E+03  0.9120850E+03  0.9086950E+03
KPROF     0.0000000E+00  0.2032673E+00  0.7616996E+00  0.1619474E+01  0.2718154E+01  0.4078743E+01  0.6800661E+01  0.1088611E+02  0.2177221E+02  0.3156971E+02  0.4015764E+02  0.5122519E+02  0.6011550E+02  0.6858248E+02  0.7372314E+02  0.7348122E+02  0.6936869E+02  0.6374421E+02  0.5594250E+02  0.4953178E+02  0.4215343E+02  0.3380742E+02  0.2449375E+02  0.1421242E+02  0.5866418E+01  0.0000000E+00
TIME	2.88d4
TEMP      0.2899951E+03  0.2899805E+03  0.2899561E+03  0.2899219E+03  0.2898780E+03  0.2898048E+03  0.2896828E+03  0.2894144E+03  0.2890240E+03  0.2886336E+03  0.2881456E+03  0.2875600E+03  0.2868768E+03  0.2859984E+03  0.2851200E+03  0.2843392E+03  0.2836560E+03  0.2830704E+03  0.2825824E+03  0.2821920E+03  0.2818016E+03  0.2810592E+03  0.2813728E+03  0.2816472E+03  0.2818824E+03
PRESS     0.1019943E+04  0.1019774E+04  0.1019492E+04  0.1019096E+04  0.1018588E+04  0.1017740E+04  0.1016328E+04  0.1013220E+04  0.1008700E+04  0.1004180E+04  0.9985300E+03  0.9917500E+03  0.9838400E+03  0.9736700E+03  0.9635000E+03  0.9544600E+03  0.9465500E+03  0.9397700E+03  0.9341200E+03  0.9296000E+03  0.9250800E+03  0.9205600E+03  0.9160400E+03  0.9120850E+03  0.9086950E+03
KPROF     0.0000000E+00  0.2033930E+00  0.7621191E+00  0.1620314E+01  0.2719525E+01  0.4080850E+01  0.6804080E+01  0.1089157E+02  0.2178314E+02  0.3158555E+02  0.4017780E+02  0.5125089E+02  0.6014567E+02  0.6861690E+02  0.7376013E+02  0.7351810E+02  0.6940351E+02  0.6377619E+02  0.5597057E+02  0.4955665E+02  0.4217458E+02  0.3382438E+02  0.2450604E+02  0.1421956E+02  0.5869362E+01  0.0000000E+00
TIME	3.24d4
TEMP      0.2899951E+03  0.2899805E+03  0.2899561E+03  0.2899219E+03  0.2898780E+03  0.2898048E+03  0.2896828E+03  0.2894144E+03  0.2890240E+03  0.2886336E+03  0.2881456E+03  0.2875600E+03  0.2868768E+03  0.2859984E+03  0.2851200E+03  0.2843392E+03  0.2836560E+03  0.2830704E+03  0.2825824E+03  0.2821920E+03  0.2818016E+03  0.2810592E+03  0.2813728E+03  0.2816472E+03  0.2818824E+03
PRESS     0.1019943E+04  0.1019774E+04  0.1019492E+04  0.1019096E+04  0.1018588E+04  0.1017740E+04  0.1016328E+04  0.1013220E+04  0.1008700E+04  0.1004180E+04  0.9985300E+03  0.9917500E+03  0.9838400E+03  0.9736700E+03  0.9635000E+03  0.9544600E+03  0.9465500E+03  0.9397700E+03  0.9341200E+03  0.9296000E+03  0.9250800E+03  0.9205600E+03  0.9160400E+03  0.9120850E+03  0.9086950E+03
KPROF     0.0000000E+00  0.2034292E+00  0.7622354E+00  0.1620582E+01  0.2719981E+01  0.4081481E+01  0.6805131E+01  0.1089319E+02  0.2178639E+02  0.3159026E+02  0.4018379E+02  0.5125854E+02  0.6015464E+02  0.6862714E+02  0.7377113E+02  0.7352906E+02  0.6941386E+02  0.6378571E+02  0.5597892E+02  0.4956404E+02  0.4218087E+02  0.3382943E+02  0.2450969E+02  0.1422168E+02  0.5870237E+01  0.0000000E+00
TIME	3.6d4
TEMP      0.2899951E+03  0.2899805E+03  0.2899561E+03  0.2899219E+03  0.2898780E+03  0.2898048E+03  0.2896828E+03  0.2894144E+03  0.2890240E+03  0.2886336E+03  0.2881456E+03  0.2875600E+03  0.2868768E+03  0.2859984E+03  0.2851200E+03  0.2843392E+03  0.2836560E+03  0.2830704E+03  0.2825824E+03  0.2821920E+03  0.2818016E+03  0.2810592E+03  0.2813728E+03  0.2816472E+03  0.2818824E+03
PRESS     0.1019943E+04  0.1019774E+04  0.1019492E+04  0.1019096E+04  0.1018588E+04  0.1017740E+04  0.1016328E+04  0.1013220E+04  0.1008700E+04  0.1004180E+04  0.9985300E+03  0.9917500E+03  0.9838400E+03  0.9736700E+03  0.9635000E+03  0.9544600E+03  0.9465500E+03  0.9397700E+03  0.9341200E+03  0.9296000E+03  0.9250800E+03  0.9205600E+03  0.9160400E+03  0.9120850E+03  0.9086950E+03
KPROF     0.0000000E+00  0.2036667E+00  0.7630240E+00  0.1622129E+01  0.2722540E+01  0.4085368E+01  0.6811602E+01  0.1090345E+02  0.2180690E+02  0.3162000E+02  0.4022161E+02  0.5130678E+02  0.6021127E+02  0.6869173E+02  0.7384057E+02  0.7359827E+02  0.6947919E+02  0.6384575E+02  0.5603161E+02  0.4961069E+02  0.4222058E+02  0.3386127E+02  0.2453276E+02  0.1423506E+02  0.5875763E+01  0.0000000E+00
TIME	3.96d4
TEMP      0.2899951E+03  0.2899805E+03  0.2899561E+03  0.2899219E+03  0.2898780E+03  0.2898048E+03  0.2896828E+03  0.2894144E+03  0.2890240E+03  0.2886336E+03  0.2881456E+03  0.2875600E+03  0.2868768E+03  0.2859984E+03  0.2851200E+03  0.2843392E+03  0.2836560E+03  0.2830704E+03  0.2825824E+03  0.2821920E+03  0.2818016E+03  0.2810592E+03  0.2813728E+03  0.2816472E+03  0.2818824E+03
PRESS     0.1019943E+04  0.1019774E+04  0.1019492E+04  0.1019096E+04  0.1018588E+04  0.1017740E+04  0.1016328E+04  0.1013220E+04  0.1008700E+04  0.1004180E+04  0.9985300E+03  0.9917500E+03  0.9838400E+03  0.9736700E+03  0.9635000E+03  0.9544600E+03  0.9465500E+03  0.9397700E+03  0.9341200E+03  0.9296000E+03  0.9250800E+03  0.9205600E+03  0.9160400E+03  0.9120850E+03  0.9086950E+03
KPROF     0.0000000E+00  0.2038538E+00  0.7636818E+00  0.1623510E+01  0.2724848E+01  0.4088825E+01  0.6817357E+01  0.1091273E+02  0.2182546E+02  0.3164692E+02  0.4025585E+02  0.5135046E+02  0.6026252E+02  0.6875021E+02  0.7390343E+02  0.7366093E+02  0.6953835E+02  0.6390010E+02  0.5607932E+02  0.4965292E+02  0.4225652E+02  0.3389009E+02  0.2455365E+02  0.1424718E+02  0.5880765E+01  0.0000000E+00
TIME	4.32d4
TEMP      0.2899951E+03  0.2899805E+03  0.2899561E+03  0.2899219E+03  0.2898780E+03  0.2898048E+03  0.2896828E+03  0.2894144E+03  0.2890240E+03  0.2886336E+03  0.2881456E+03  0.2875600E+03  0.2868768E+03  0.2859984E+03  0.2851200E+03  0.2843392E+03  0.2836560E+03  0.2830704E+03  0.2825824E+03  0.2821920E+03  0.2818016E+03  0.2810592E+03  0.2813728E+03  0.2816472E+03  0.2818824E+03
PRESS     0.1019943E+04  0.1019774E+04  0.1019492E+04  0.1019096E+04  0.1018588E+04  0.1017740E+04  0.1016328E+04  0.1013220E+04  0.1008700E+04  0.1004180E+04  0.9985300E+03  0.9917500E+03  0.9838400E+03  0.9736700E+03  0.9635000E+03  0.9544600E+03  0.9465500E+03  0.9397700E+03  0.9341200E+03  0.9296000E+03  0.9250800E+03  0.9205600E+03  0.9160400E+03  0.9120850E+03  0.9086950E+03
KPROF     0.0000000E+00  0.2038810E+00  0.7637497E+00  0.1623607E+01  0.2724987E+01  0.4089035E+01  0.6817618E+01  0.1091306E+02  0.2182612E+02  0.3164788E+02  0.4025707E+02  0.5135202E+02  0.6026435E+02  0.6875230E+02  0.7390568E+02  0.7366317E+02  0.6954045E+02  0.6390204E+02  0.5608102E+02  0.4965443E+02  0.4225780E+02  0.3389112E+02  0.2455440E+02  0.1424761E+02  0.5880944E+01  0.0000000E+00
TIME	4.68d4
TEMP      0.2899951E+03  0.2899805E+03  0.2899561E+03  0.2899219E+03  0.2898780E+03  0.2898048E+03  0.2896828E+03  0.2894144E+03  0.2890240E+03  0.2886336E+03  0.2881456E+03  0.2875600E+03  0.2868768E+03  0.2859984E+03  0.2851200E+03  0.2843392E+03  0.2836560E+03  0.2830704E+03  0.2825824E+03  0.2821920E+03  0.2818016E+03  0.2810592E+03  0.2813728E+03  0.2816472E+03  0.2818824E+03
PRESS     0.1019943E+04  0.1019774E+04  0.1019492E+04  0.1019096E+04  0.1018588E+04  0.1017740E+04  0.1016328E+04  0.1013220E+04  0.1008700E+04  0.1004180E+04  0.9985300E+03  0.9917500E+03  0.9838400E+03  0.9736700E+03  0.9635000E+03  0.9544600E+03  0.9465500E+03  0.9397700E+03  0.9341200E+03  0.9296000E+03  0.9250800E+03  0.9205600E+03  0.9160400E+03  0.9120850E+03  0.9086950E+03
KPROF     0.0000000E+00  0.2038538E+00  0.7636818E+00  0.1623510E+01  0.2724848E+01  0.4088825E+01  0.6817357E+01  0.1091273E+02  0.2182546E+02  0.3164692E+02  0.4025585E+02  0.5135046E+02  0.6026252E+02  0.6875021E+02  0.7390343E+02  0.7366093E+02  0.6953835E+02  0.6390010E+02  0.5607932E+02  0.4965292E+02  0.4225652E+02  0.3389009E+02  0.2455365E+02  0.1424718E+02  0.5880765E+01  0.0000000E+00
TIME	5.04d4
TEMP      0.2899951E+03  0.2899805E+03  0.2899561E+03  0.2899219E+03  0.2898780E+03  0.2898048E+03  0.2896828E+03  0.2894144E+03  0.2890240E+03  0.2886336E+03  0.2881456E+03  0.2875600E+03  0.2868768E+03  0.2859984E+03  0.2851200E+03  0.2843392E+03  0.2836560E+03  0.2830704E+03  0.2825824E+03  0.2821920E+03  0.2818016E+03  0.2810592E+03  0.2813728E+03  0.2816472E+03  0.2818824E+03
PRESS     0.1019943E+04  0.1019774E+04  0.1019492E+04  0.1019096E+04  0.1018588E+04  0.1017740E+04  0.1016328E+04  0.1013220E+04  0.1008700E+04  0.1004180E+04  0.9985300E+03  0.9917500E+03  0.9838400E+03  0.9736700E+03  0.9635000E+03  0.9544600E+03  0.9465500E+03  0.9397700E+03  0.9341200E+03  0.9296000E+03  0.9250800E+03  0.9205600E+03  0.9160400E+03  0.9120850E+03  0.9086950E+03
KPROF     0.0000000E+00  0.2036667E+00  0.7630240E+00  0.1622129E+01  0.2722540E+01  0.4085368E+01  0.6811602E+01  0.1090345E+02  0.2180690E+02  0.3162000E+02  0.4022161E+02  0.5130678E+02  0.6021127E+02  0.6869173E+02  0.7384057E+02  0.7359827E+02  0.6947919E+02  0.6384575E+02  0.5603161E+02  0.4961069E+02  0.4222058E+02  0.3386127E+02  0.2453276E+02  0.1423506E+02  0.5875763E+01  0.0000000E+00
TIME	5.4d4
TEMP      0.2899951E+03  0.2899805E+03  0.2899561E+03  0.2899219E+03  0.2898780E+03  0.2898048E+03  0.2896828E+03  0.2894144E+03  0.2890240E+03  0.2886336E+03  0.2881456E+03  0.2875600E+03  0.2868768E+03  0.2859984E+03  0.2851200E+03  0.2843392E+03  0.2836560E+03  0.2830704E+03  0.2825824E+03  0.2821920E+03  0.2818016E+03  0.2810592E+03  0.2813728E+03  0.2816472E+03  0.2818824E+03
PRESS     0.1019943E+04  0.1019774E+04  0.1019492E+04  0.1019096E+04  0.1018588E+04  0.1017740E+04  0.1016328E+04  0.1013220E+04  0.1008700E+04  0.1004180E+04  0.9985300E+03  0.9917500E+03  0.9838400E+03  0.9736700E+03  0.9635000E+03  0.9544600E+03  0.9465500E+03  0.9397700E+03  0.9341200E+03  0.9296000E+03  0.9250800E+03  0.9205600E+03  0.9160400E+03  0.9120850E+03  0.9086950E+03
KPROF     0.0000000E+00  0.2034292E+00  0.7622354E+00  0.1620582E+01  0.2719981E+01  0.4081481E+01  0.6805131E+01  0.1089319E+02  0.2178639E+02  0.3159026E+02  0.4018379E+02  0.5125854E+02  0.6015464E+02  0.6862714E+02  0.7377113E+02  0.7352906E+02  0.6941386E+02  0.6378571E+02  0.5597892E+02  0.4956404E+02  0.4218087E+02  0.3382943E+02  0.2450969E+02  0.1422168E+02  0.5870237E+01  0.0000000E+00
TIME	5.76d4
TEMP      0.2899951E+03  0.2899805E+03  0.2899561E+03  0.2899219E+03  0.2898780E+03  0.2898048E+03  0.2896828E+03  0.2894144E+03  0.2890240E+03  0.2886336E+03  0.2881456E+03  0.2875600E+03  0.2868768E+03  0.2859984E+03  0.2851200E+03  0.2843392E+03  0.2836560E+03  0.2830704E+03  0.2825824E+03  0.2821920E+03  0.2818016E+03  0.2810592E+03  0.2813728E+03  0.2816472E+03  0.2818824E+03
PRESS     0.1019943E+04  0.1019774E+04  0.1019492E+04  0.1019096E+04  0.1018588E+04  0.1017740E+04  0.1016328E+04  0.1013220E+04  0.1008700E+04  0.1004180E+04  0.9985300E+03  0.9917500E+03  0.9838400E+03  0.9736700E+03  0.9635000E+03  0.9544600E+03  0.9465500E+03  0.9397700E+03  0.9341200E+03  0.9296000E+03  0.9250800E+03  0.9205600E+03  0.9160400E+03  0.9120850E+03  0.9086950E+03
KPROF     0.0000000E+00  0.2033930E+00  0.7621191E+00  0.1620314E+01  0.2719525E+01  0.4080850E+01  0.6804080E+01  0.1089157E+02  0.2178314E+02  0.3158555E+02  0.4017780E+02  0.5125089E+02  0.6014567E+02  0.6861690E+02  0.7376013E+02  0.7351810E+02  0.6940351E+02  0.6377619E+02  0.5597057E+02  0.4955665E+02  0.4217458E+02  0.3382438E+02  0.2450604E+02  0.1421956E+02  0.5869362E+01  0.0000000E+00
TIME	6.12d4
TEMP      0.2899951E+03  0.2899805E+03  0.2899561E+03  0.2899219E+03  0.2898780E+03  0.2898048E+03  0.2896828E+03  0.2894144E+03  0.2890240E+03  0.2886336E+03  0.2881456E+03  0.2875600E+03  0.2868768E+03  0.2859984E+03  0.2851200E+03  0.2843392E+03  0.2836560E+03  0.2830704E+03  0.2825824E+03  0.2821920E+03  0.2818016E+03  0.2810592E+03  0.2813728E+03  0.2816472E+03  0.2818824E+03
PRESS     0.1019943E+04  0.1019774E+04  0.1019492E+04  0.1019096E+04  0.1018588E+04  0.1017740E+04  0.1016328E+04  0.1013220E+04  0.1008700E+04  0.1004180E+04  0.9985300E+03  0.9917500E+03  0.9838400E+03  0.9736700E+03  0.9635000E+03  0.9544600E+03  0.9465500E+03  0.9397700E+03  0.9341200E+03  0.9296000E+03  0.9250800E+03  0.9205600E+03  0.9160400E+03  0.9120850E+03  0.9086950E+03
KPROF     0.0000000E+00  0.2032673E+00  0.7616996E+00  0.1619474E+01  0.2718154E+01  0.4078743E+01  0.6800661E+01  0.1088611E+02  0.2177221E+02  0.3156971E+02  0.4015764E+02  0.5122519E+02  0.6011550E+02  0.6858248E+02  0.7372314E+02  0.7348122E+02  0.6936869E+02  0.6374421E+02  0.5594250E+02  0.4953178E+02  0.4215343E+02  0.3380742E+02  0.2449375E+02  0.1421242E+02  0.5866418E+01  0.0000000E+00
TIME	6.48d4
TEMP      0.2899951E+03  0.2899805E+03  0.2899561E+03  0.2899219E+03  0.2898780E+03  0.2898048E+03  0.2896828E+03  0.2894144E+03  0.2890240E+03  0.2886336E+03  0.2881456E+03  0.2875600E+03  0.2868768E+03  0.2859984E+03  0.2851200E+03  0.2843392E+03  0.2836560E+03  0.2830704E+03  0.2825824E+03  0.2821920E+03  0.2818016E+03  0.2810592E+03  0.2813728E+03  0.2816472E+03  0.2818824E+03
PRESS     0.1019943E+04  0.1019774E+04  0.1019492E+04  0.1019096E+04  0.1018588E+04  0.1017740E+04  0.1016328E+04  0.1013220E+04  0.1008700E+04  0.1004180E+04  0.9985300E+03  0.9917500E+03  0.9838400E+03  0.9736700E+03  0.9635000E+03  0.9544600E+03  0.9465500E+03  0.9397700E+03  0.9341200E+03  0.9296000E+03  0.9250800E+03  0.9205600E+03  0.9160400E+03  0.9120850E+03  0.9086950E+03
KPROF     0.0000000E+00  0.2030303E+00  0.7608588E+00  0.1617759E+01  0.2715279E+01  0.4074467E+01  0.6793542E+01  0.1087482E+02  0.2174964E+02  0.3153698E+02  0.4011600E+02  0.5117208E+02  0.6005318E+02  0.6851138E+02  0.7364670E+02  0.7340504E+02  0.6929678E+02  0.6367812E+02  0.5588450E+02  0.4948043E+02  0.4210972E+02  0.3377236E+02  0.2446835E+02  0.1419769E+02  0.5860336E+01  0.0000000E+00
TIME	6.66d4
TEMP      0.2899951E+03  0.2899805E+03  0.2899561E+03  0.2899219E+03  0.2898780E+03  0.2898048E+03  0.2896828E+03  0.2894144E+03  0.2890240E+03  0.2886336E+03  0.2881456E+03  0.2875600E+03  0.2868768E+03  0.2859984E+03  0.2851200E+03  0.2843392E+03  0.2836560E+03  0.2830704E+03  0.2825824E+03  0.2821920E+03  0.2818016E+03  0.2810592E+03  0.2813728E+03  0.2816472E+03  0.2818824E+03
PRESS     0.1019943E+04  0.1019774E+04  0.1019492E+04  0.1019096E+04  0.1018588E+04  0.1017740E+04  0.1016328E+04  0.1013220E+04  0.1008700E+04  0.1004180E+04  0.9985300E+03  0.9917500E+03  0.9838400E+03  0.9736700E+03  0.9635000E+03  0.9544600E+03  0.9465500E+03  0.9397700E+03  0.9341200E+03  0.9296000E+03  0.9250800E+03  0.9205600E+03  0.9160400E+03  0.9120850E+03  0.9086950E+03
KPROF     0.0000000E+00  0.2028995E+00  0.7603852E+00  0.1616752E+01  0.2713583E+01  0.4071959E+01  0.6789314E+01  0.1086812E+02  0.2173624E+02  0.3151755E+02  0.4009129E+02  0.5114054E+02  0.6001617E+02  0.6846916E+02  0.7360132E+02  0.7335980E+02  0.6925407E+02  0.6363888E+02  0.5585006E+02  0.4944994E+02  0.4208377E+02  0.3375155E+02  0.2445327E+02  0.1418894E+02  0.5856724E+01  0.0000000E+00
TIME	6.84d4
TEMP      0.2869951E+03  0.2869805E+03  0.2869561E+03  0.2869219E+03  0.2868780E+03  0.2868048E+03  0.2866828E+03  0.2864144E+03  0.2860240E+03  0.2856336E+03  0.2851456E+03  0.2845600E+03  0.2838768E+03  0.2829984E+03  0.2821200E+03  0.2813392E+03  0.2806560E+03  0.2808864E+03  0.2810784E+03  0.2812320E+03  0.2813856E+03  0.2815392E+03  0.2816928E+03  0.2818272E+03  0.2819424E+03
PRESS     0.1019943E+04  0.1019774E+04  0.1019492E+04  0.1019096E+04  0.1018588E+04  0.1017740E+04  0.1016328E+04  0.1013220E+04  0.1008700E+04  0.1004180E+04  0.9985300E+03  0.9917500E+03  0.9838400E+03  0.9736700E+03  0.9635000E+03  0.9544600E+03  0.9465500E+03  0.9397700E+03  0.9341200E+03  0.9296000E+03  0.9250800E+03  0.9205600E+03  0.9160400E+03  0.9120850E+03  0.9086950E+03
KPROF     0.0000000E+00  0.2028995E+00  0.7603852E+00  0.1616752E+01  0.2713583E+01  0.4071959E+01  0.6789314E+01  0.1086812E+02  0.2123463E+02  0.2984553E+02  0.3711881E+02  0.4552071E+02  0.5091297E+02  0.5342099E+02  0.4903194E+02  0.3950143E+02  0.2462048E+02  0.9948503E+01  0.0000000E+00  0.0000000E+00  0.0000000E+00  0.0000000E+00  0.0000000E+00  0.0000000E+00  0.0000000E+00  0.0000000E+00
TIME	7.02d4
TEMP      0.2839951E+03  0.2839805E+03  0.2839561E+03  0.2839219E+03  0.2838780E+03  0.2838048E+03  0.2836828E+03  0.2834144E+03  0.2830240E+03  0.2826336E+03  0.2821456E+03  0.2810057E+03  0.2810985E+03  0.2812178E+03  0.2813371E+03  0.2814432E+03  0.2815360E+03  0.2816155E+03  0.2816818E+03  0.2817349E+03  0.2817879E+03  0.2818409E+03  0.2818940E+03  0.2819403E+03  0.2819801E+03
PRESS     0.1019943E+04  0.1019774E+04  0.1019492E+04  0.1019096E+04  0.1018588E+04  0.1017740E+04  0.1016328E+04  0.1013220E+04  0.1008700E+04  0.1004180E+04  0.9985300E+03  0.9917500E+03  0.9838400E+03  0.9736700E+03  0.9635000E+03  0.9544600E+03  0.9465500E+03  0.9397700E+03  0.9341200E+03  0.9296000E+03  0.9250800E+03  0.9205600E+03  0.9160400E+03  0.9120850E+03  0.9086950E+03
KPROF     0.0000000E+00  0.2028995E+00  0.7603852E+00  0.1616752E+01  0.2713583E+01  0.4071959E+01  0.6789314E+01  0.1050585E+02  0.1811353E+02  0.2282305E+02  0.2463440E+02  0.2191737E+02  0.1267947E+02  0.0000000E+00  0.0000000E+00  0.0000000E+00  0.0000000E+00  0.0000000E+00  0.0000000E+00  0.0000000E+00  0.0000000E+00  0.0000000E+00  0.0000000E+00  0.0000000E+00  0.0000000E+00  0.0000000E+00
TIME	7.2d4
TEMP      0.2839951E+03  0.2839805E+03  0.2839561E+03  0.2839219E+03  0.2838780E+03  0.2838048E+03  0.2836828E+03  0.2834144E+03  0.2830240E+03  0.2826336E+03  0.2821456E+03  0.2810057E+03  0.2810985E+03  0.2812178E+03  0.2813371E+03  0.2814432E+03  0.2815360E+03  0.2816155E+03  0.2816818E+03  0.2817349E+03  0.2817879E+03  0.2818409E+03  0.2818940E+03  0.2819403E+03  0.2819801E+03
PRESS     0.1019943E+04  0.1019774E+04  0.1019492E+04  0.1019096E+04  0.1018588E+04  0.1017740E+04  0.1016328E+04  0.1013220E+04  0.1008700E+04  0.1004180E+04  0.9985300E+03  0.9917500E+03  0.9838400E+03  0.9736700E+03  0.9635000E+03  0.9544600E+03  0.9465500E+03  0.9397700E+03  0.9341200E+03  0.9296000E+03  0.9250800E+03  0.9205600E+03  0.9160400E+03  0.9120850E+03  0.9086950E+03
KPROF     0.0000000E+00  0.2028995E+00  0.7603852E+00  0.1616752E+01  0.2713583E+01  0.4071959E+01  0.6789314E+01  0.1050585E+02  0.1811353E+02  0.2282305E+02  0.2463440E+02  0.2191737E+02  0.1267947E+02  0.0000000E+00  0.0000000E+00  0.0000000E+00  0.0000000E+00  0.0000000E+00  0.0000000E+00  0.0000000E+00  0.0000000E+00  0.0000000E+00  0.0000000E+00  0.0000000E+00  0.0000000E+00  0.0000000E+00
TIME	8.64d4
TEMP      0.2839951E+03  0.2839805E+03  0.2839561E+03  0.2839219E+03  0.2838780E+03  0.2838048E+03  0.2836828E+03  0.2834144E+03  0.2830240E+03  0.2826336E+03  0.2821456E+03  0.2810057E+03  0.2810985E+03  0.2812178E+03  0.2813371E+03  0.2814432E+03  0.2815360E+03  0.2816155E+03  0.2816818E+03  0.2817349E+03  0.2817879E+03  0.2818409E+03  0.2818940E+03  0.2819403E+03  0.2819801E+03
PRESS     0.1019943E+04  0.1019774E+04  0.1019492E+04  0.1019096E+04  0.1018588E+04  0.1017740E+04  0.1016328E+04  0.1013220E+04  0.1008700E+04  0.1004180E+04  0.9985300E+03  0.9917500E+03  0.9838400E+03  0.9736700E+03  0.9635000E+03  0.9544600E+03  0.9465500E+03  0.9397700E+03  0.9341200E+03  0.9296000E+03  0.9250800E+03  0.9205600E+03  0.9160400E+03  0.9120850E+03  0.9086950E+03
KPROF     0.0000000E+00  0.2028995E+00  0.7603852E+00  0.1616752E+01  0.2713583E+01  0.4071959E+01  0.6789314E+01  0.1050585E+02  0.1811353E+02  0.2282305E+02  0.2463440E+02  0.2191737E+02  0.1267947E+02  0.0000000E+00  0.0000000E+00  0.0000000E+00  0.0000000E+00  0.0000000E+00  0.0000000E+00  0.0000000E+00  0.0000000E+00  0.0000000E+00  0.0000000E+00  0.0000000E+00  0.0000000E+00  0.0000000E+00
