# Supplementary material for: Modelling multi-phase halogen chemistry in the coastal marine boundary layer: investigation of the relative importance of local chemistry vs. long-range transport
Source: Copernicus journal article supplement (doi:10.5194/acp-11-979-2011), 2011-02-02

## Gas-phase Mixing Ratios for the 12 Roscoff Runs

### Data Heights:

Black - 0.5 metres

Red - 8 metres

Blue - 60 metres

Green - 250 metres

Purple - 650 metres

## Base Chemistry Scheme, High Tide

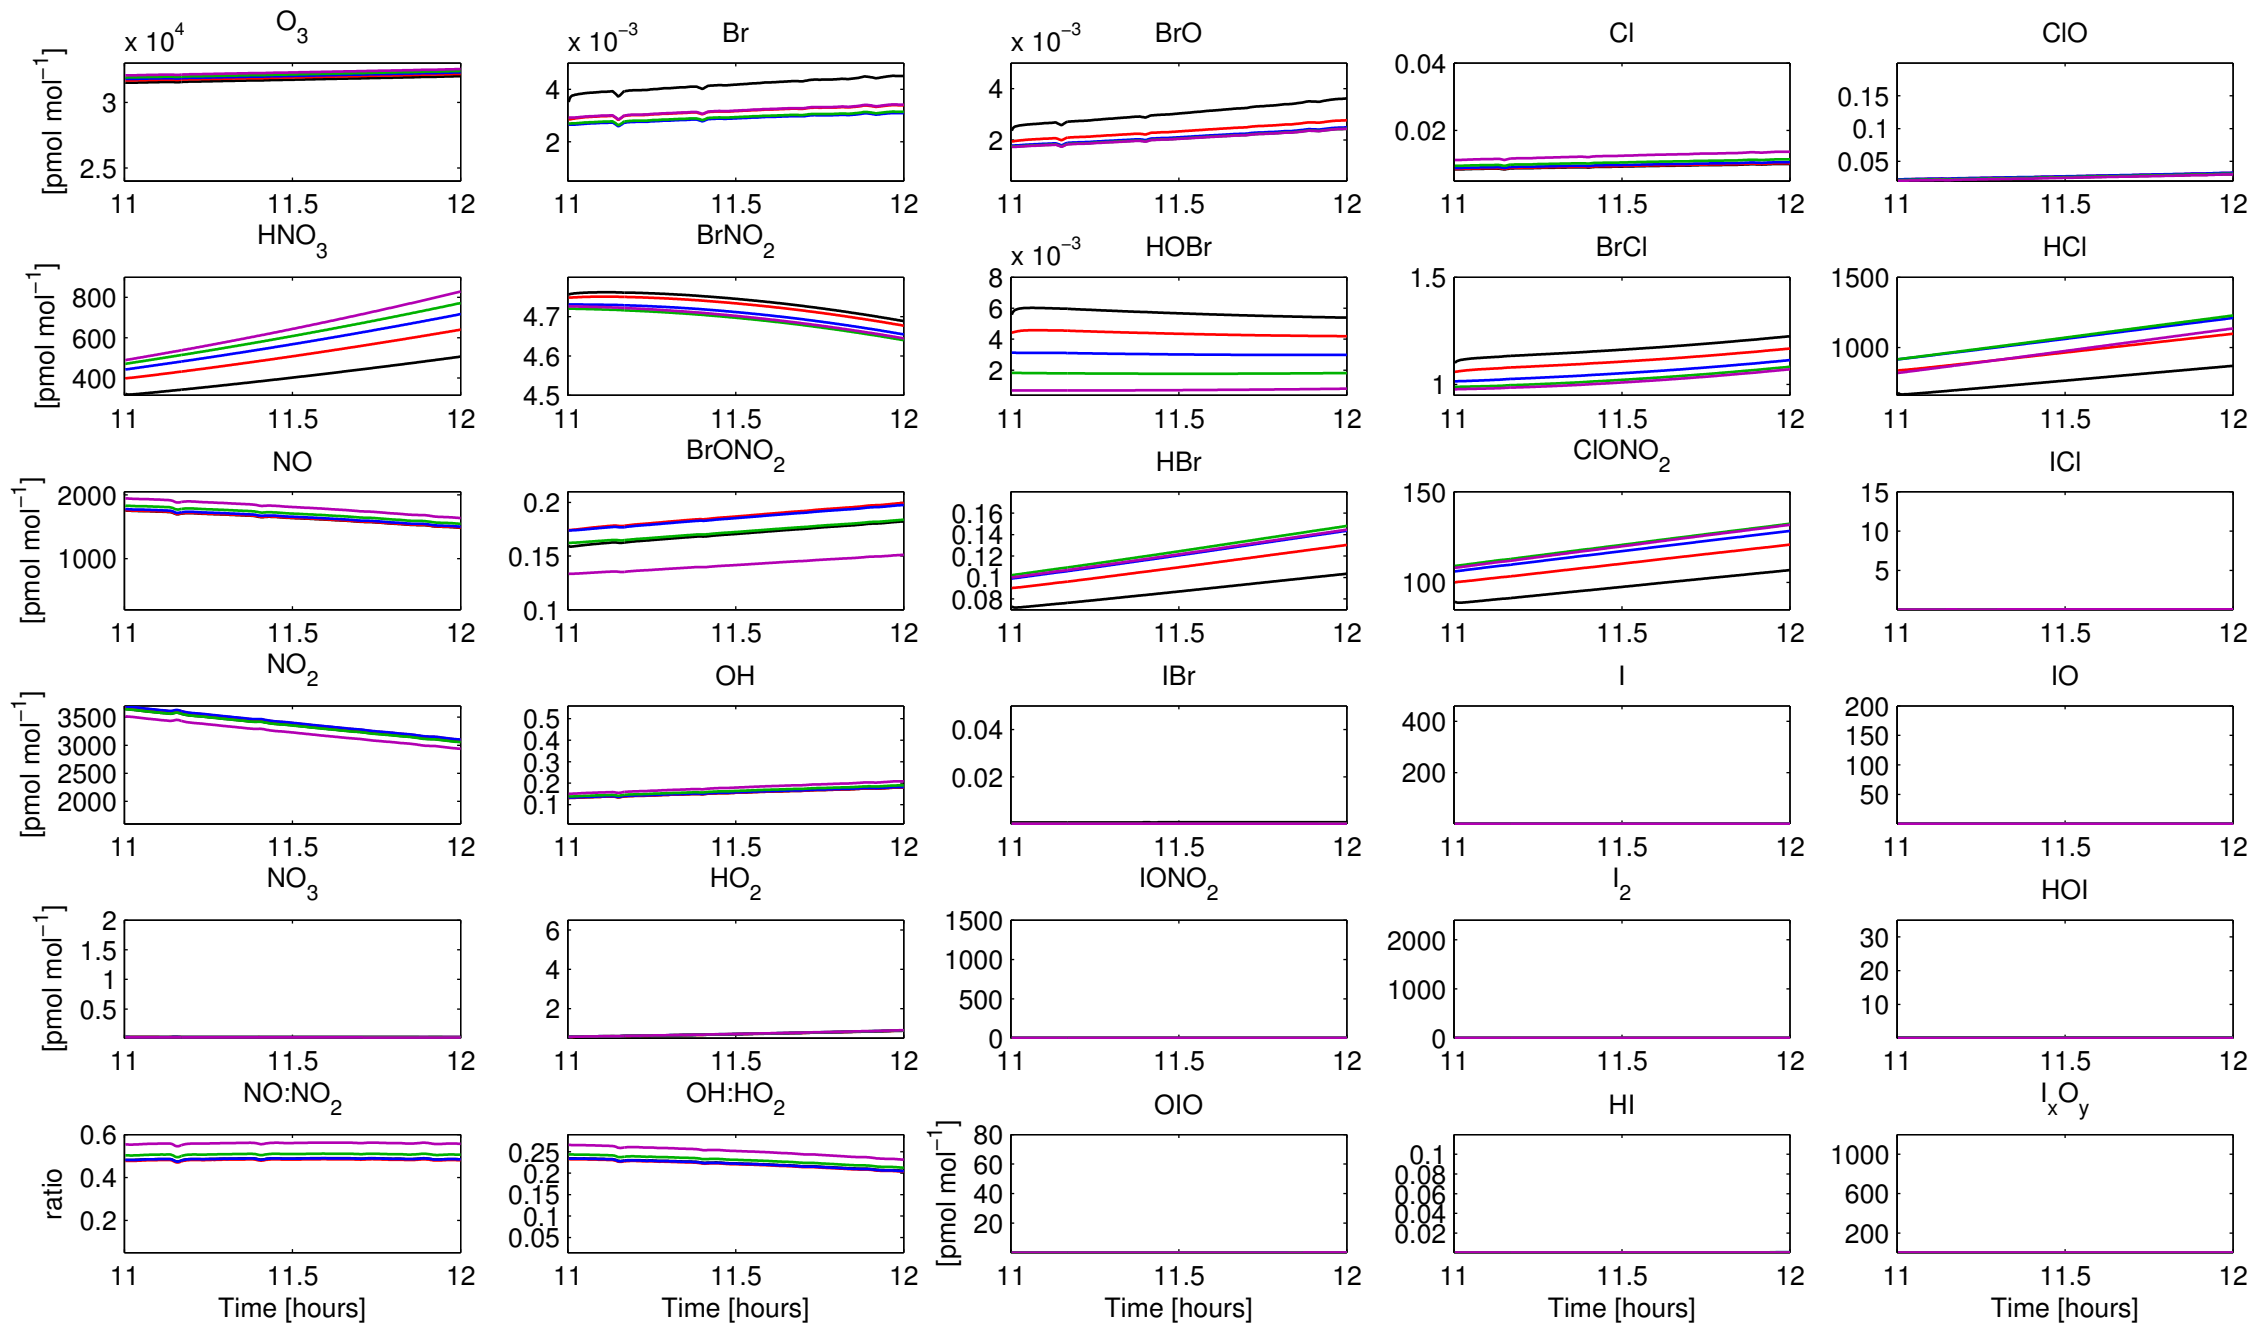

Base Chemistry Scheme, Low Tide, First I2 emission Scenario

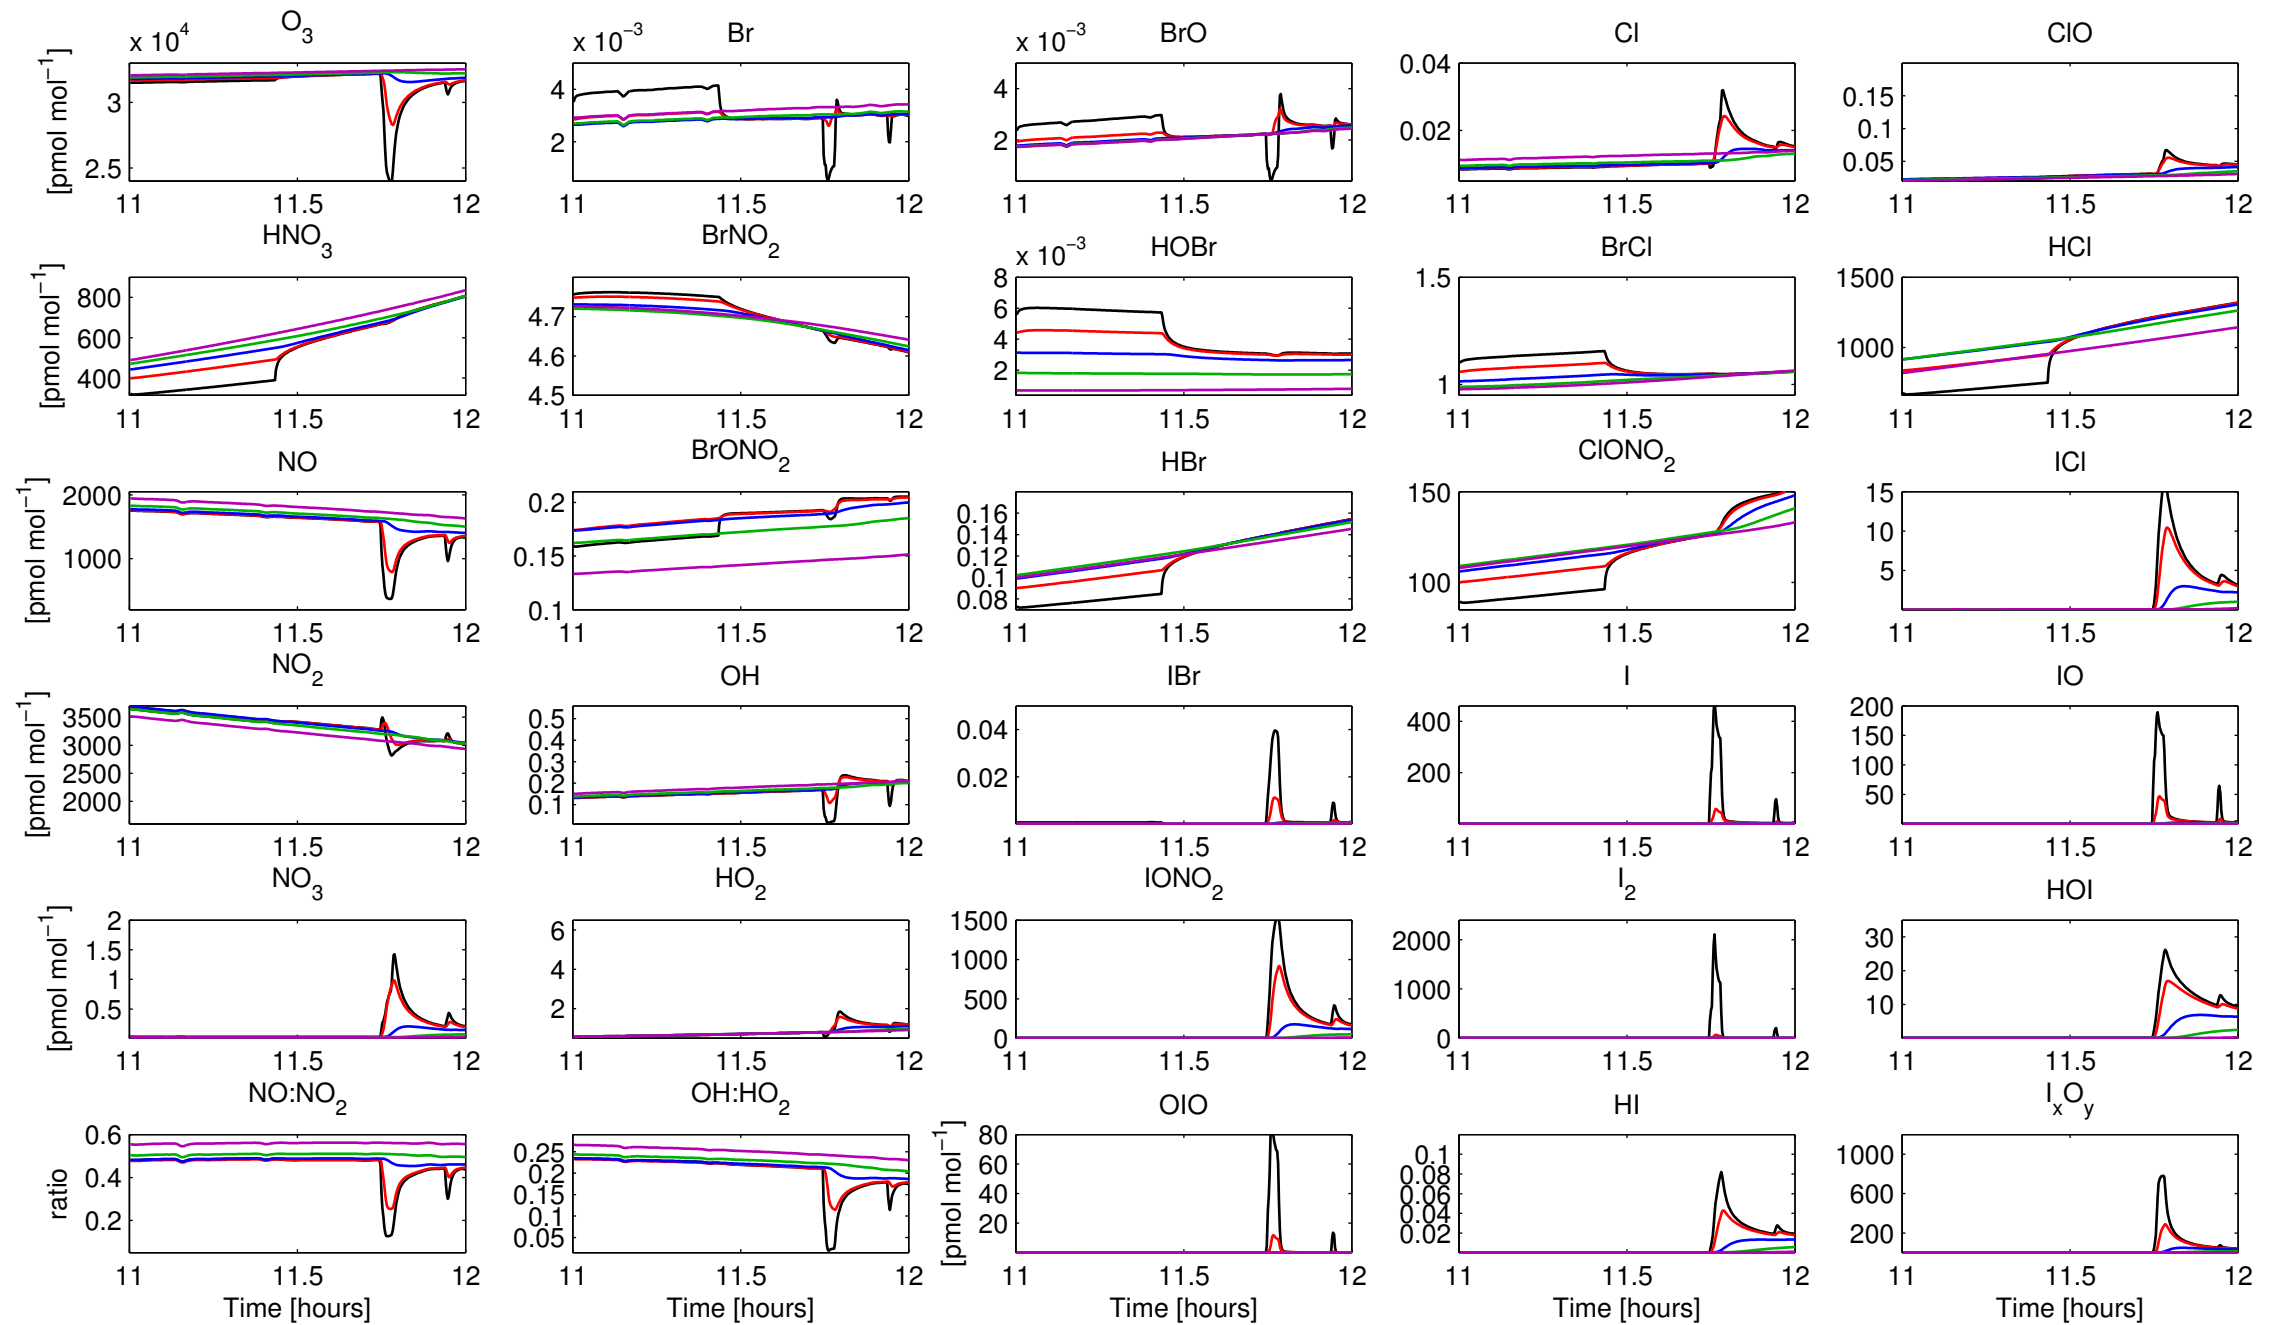

# Base Chemistry Scheme, High Tide, Sea Br<sub>2</sub> Source

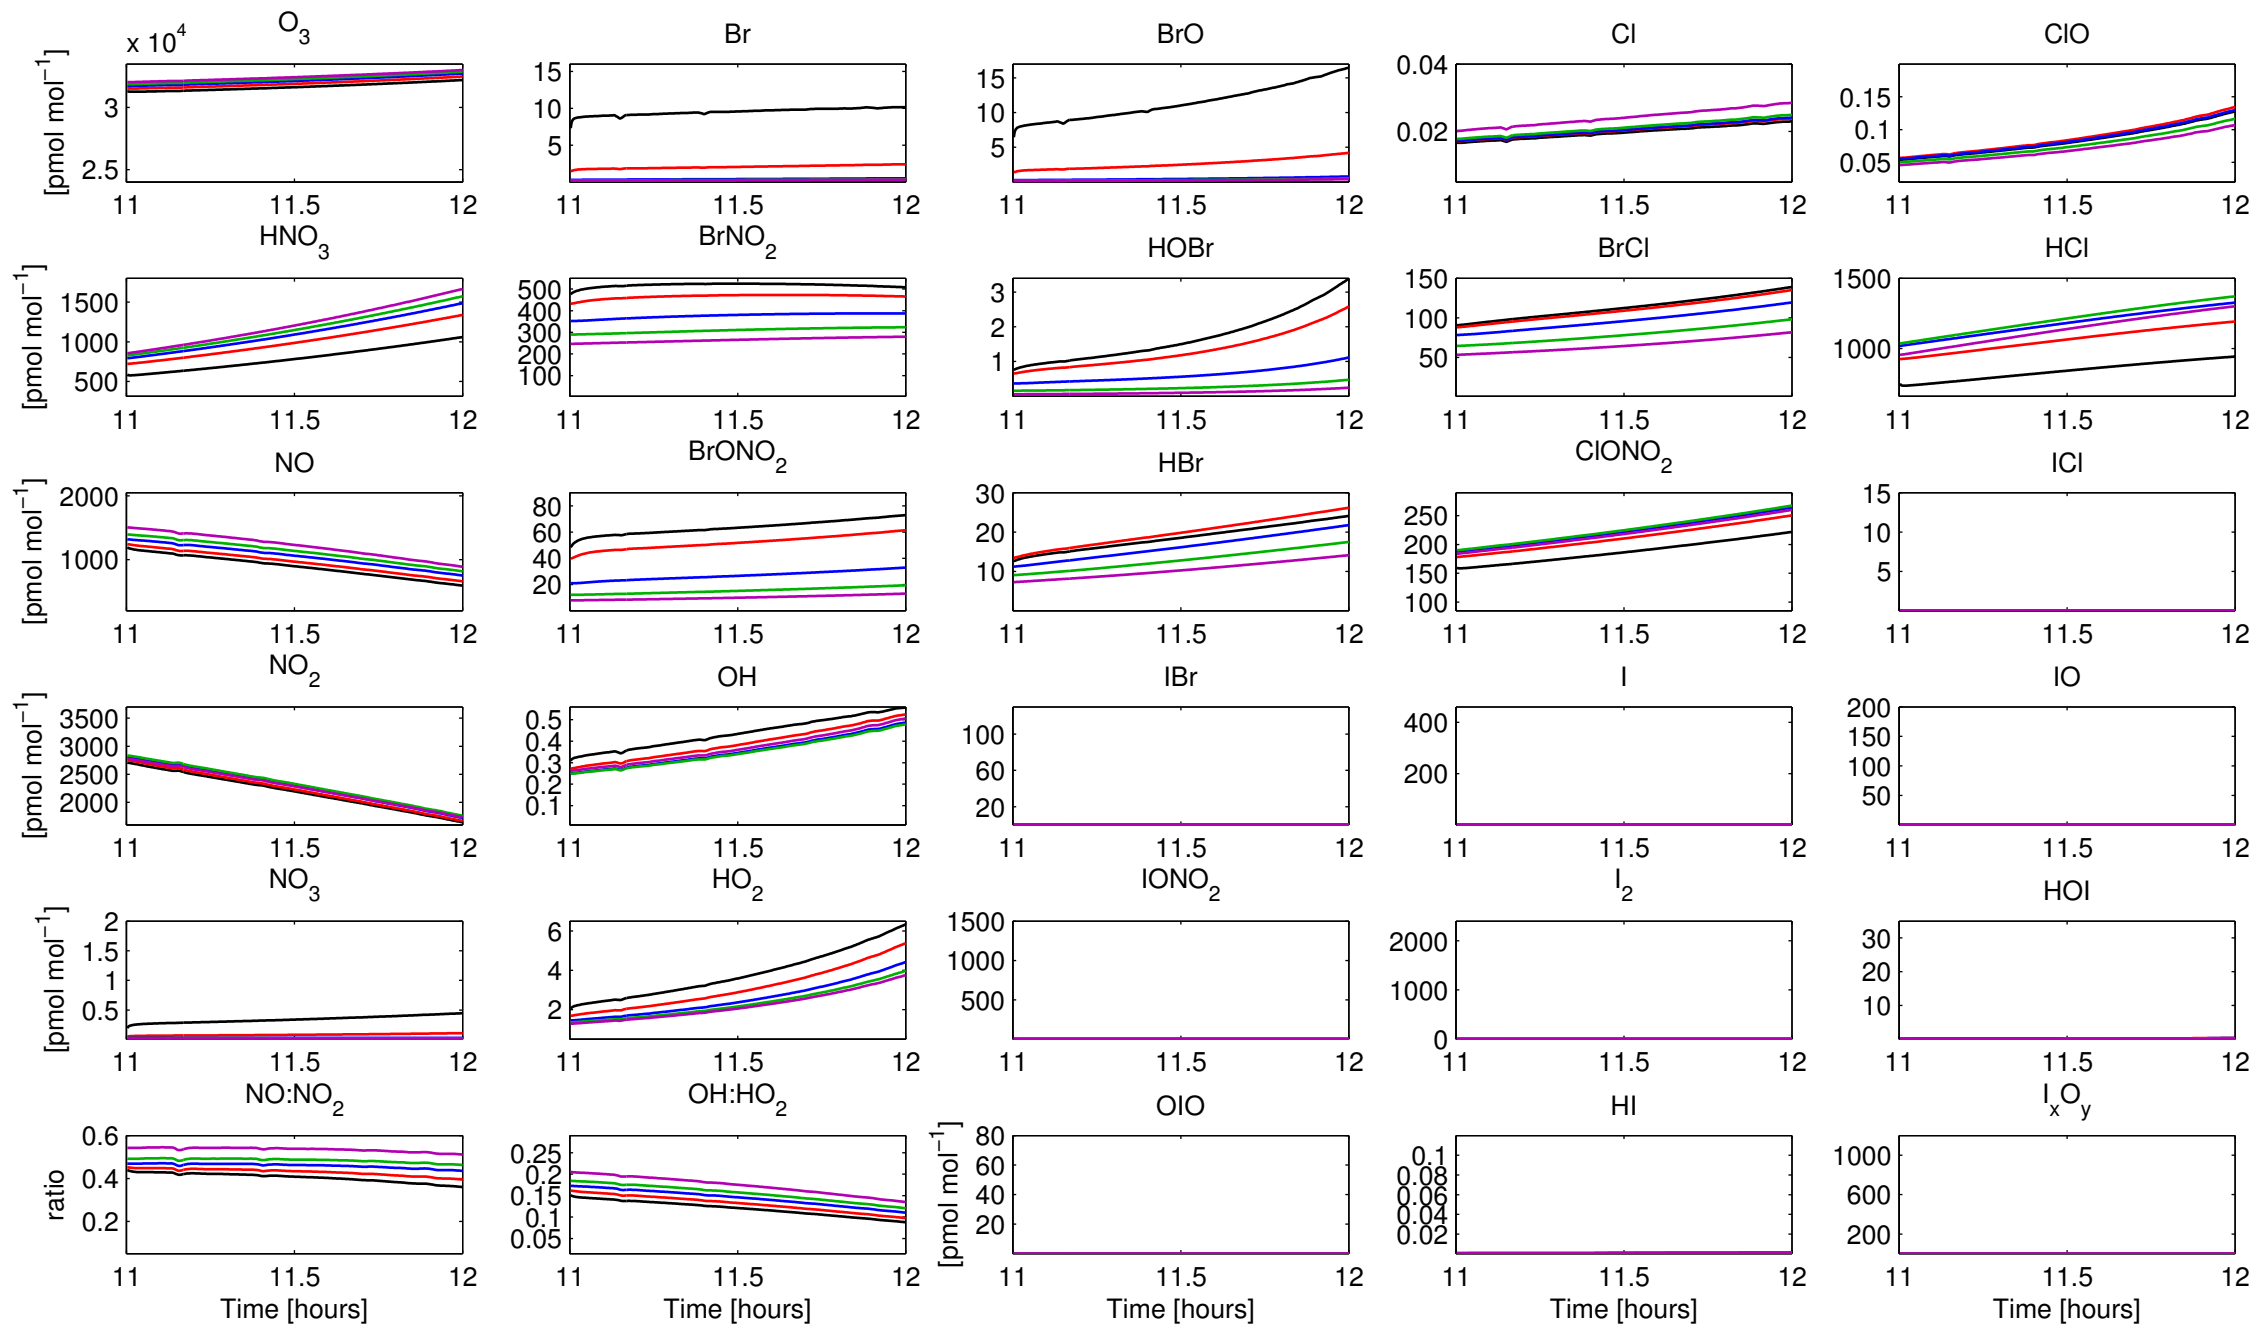

# Base Chemistry Scheme, Low Tide, Sea Br2 Source

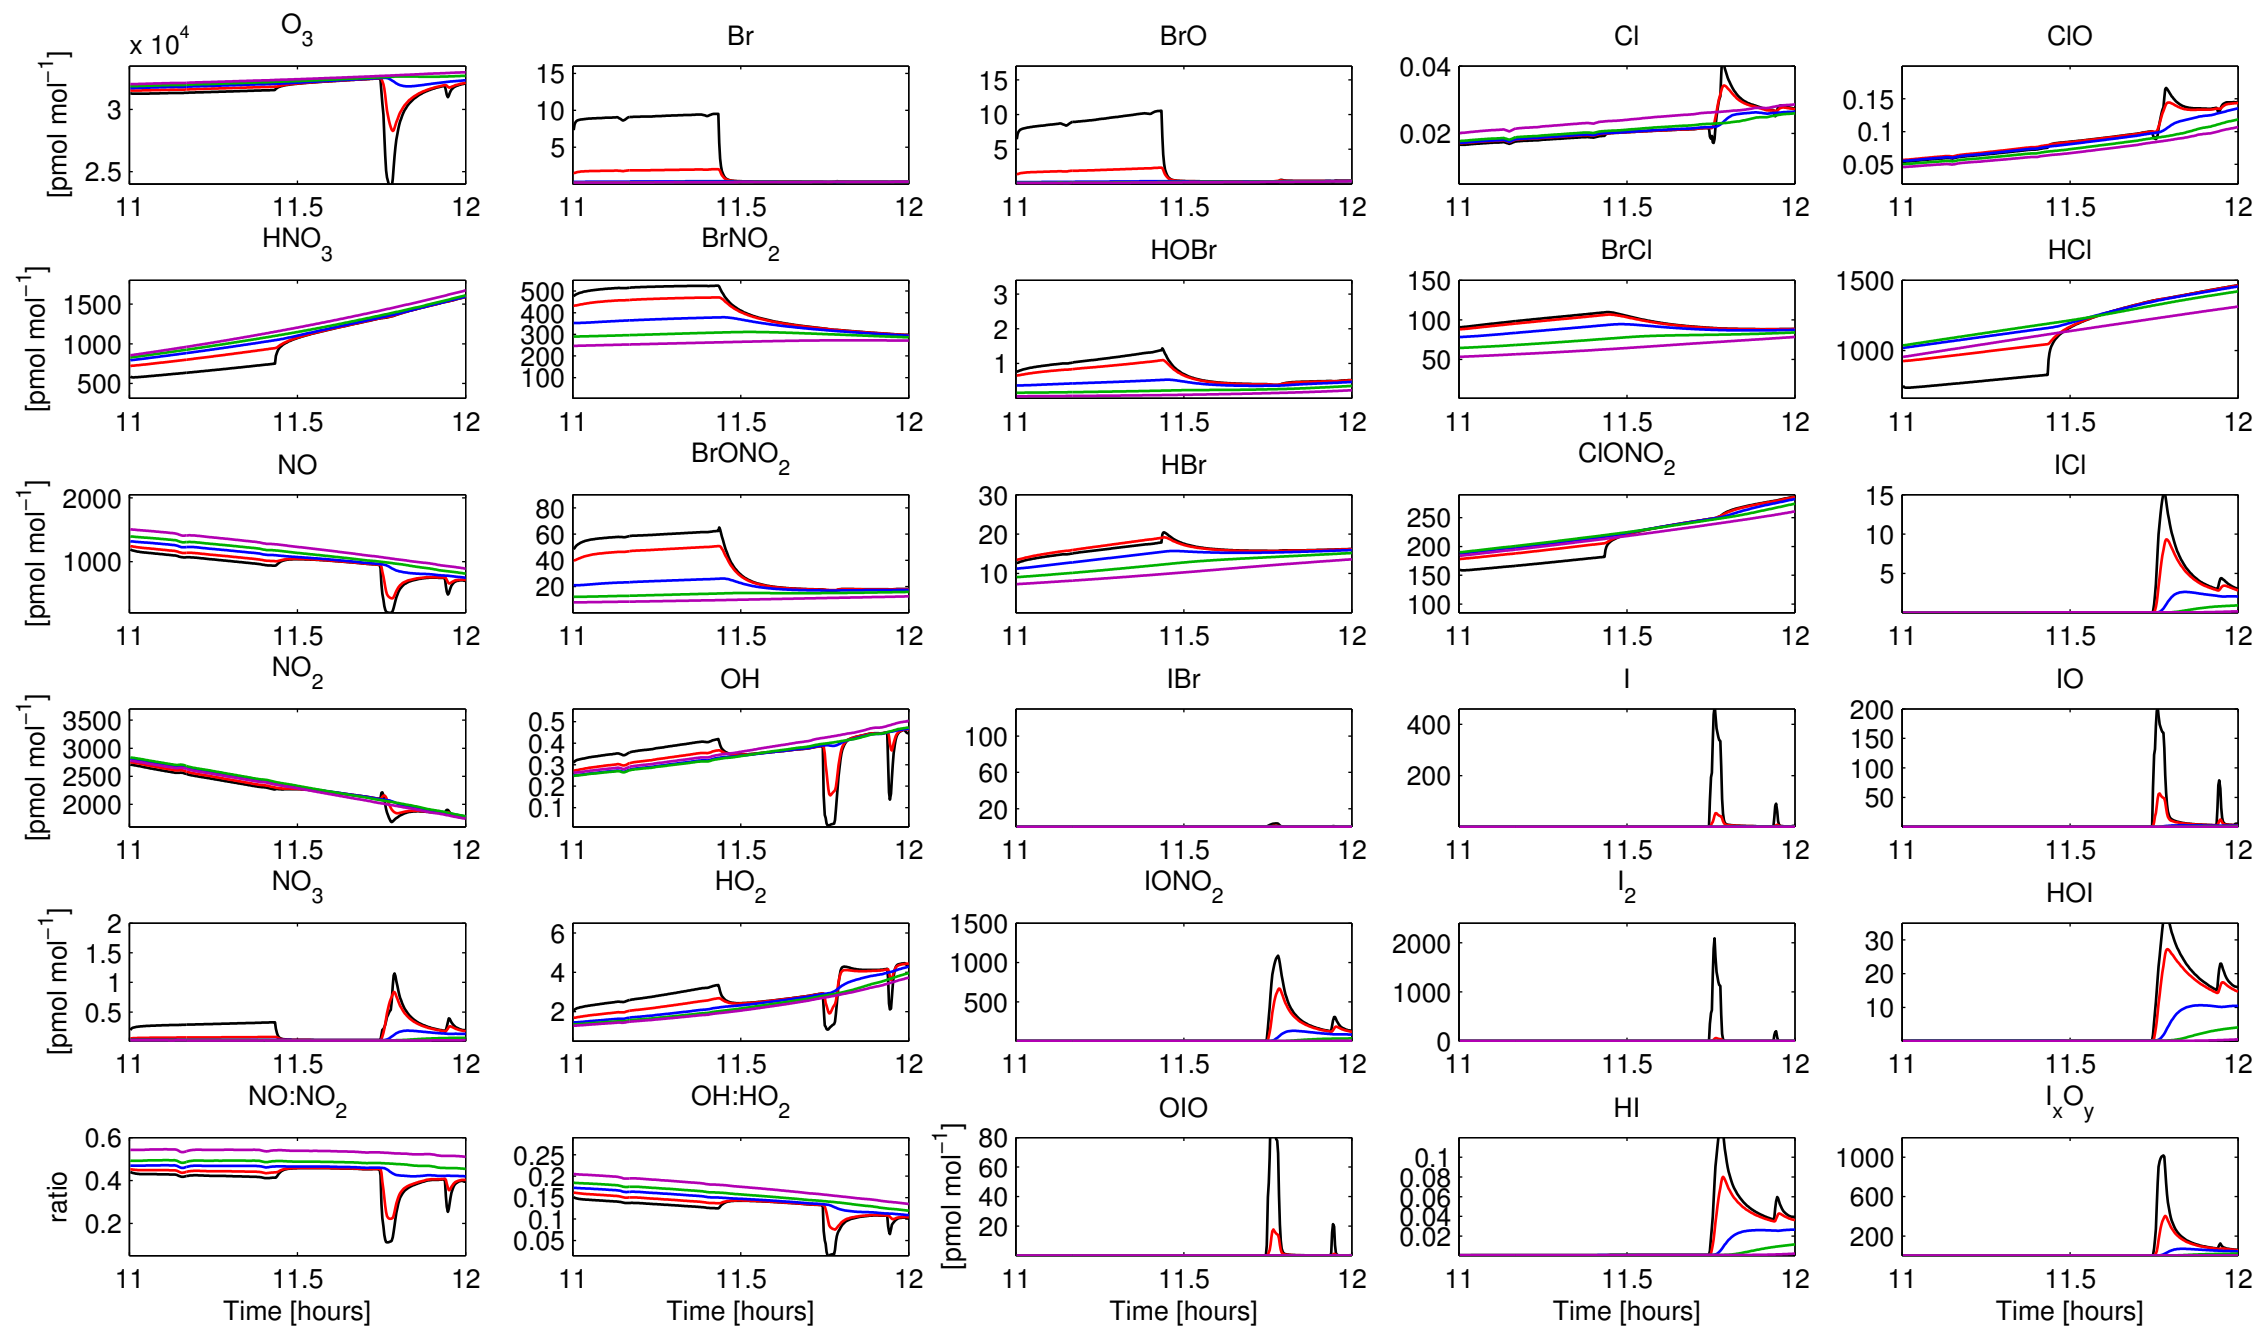

# Base Chemistry Scheme, Low Tide, First I2 Emission Scenario, Beach Br2 Source

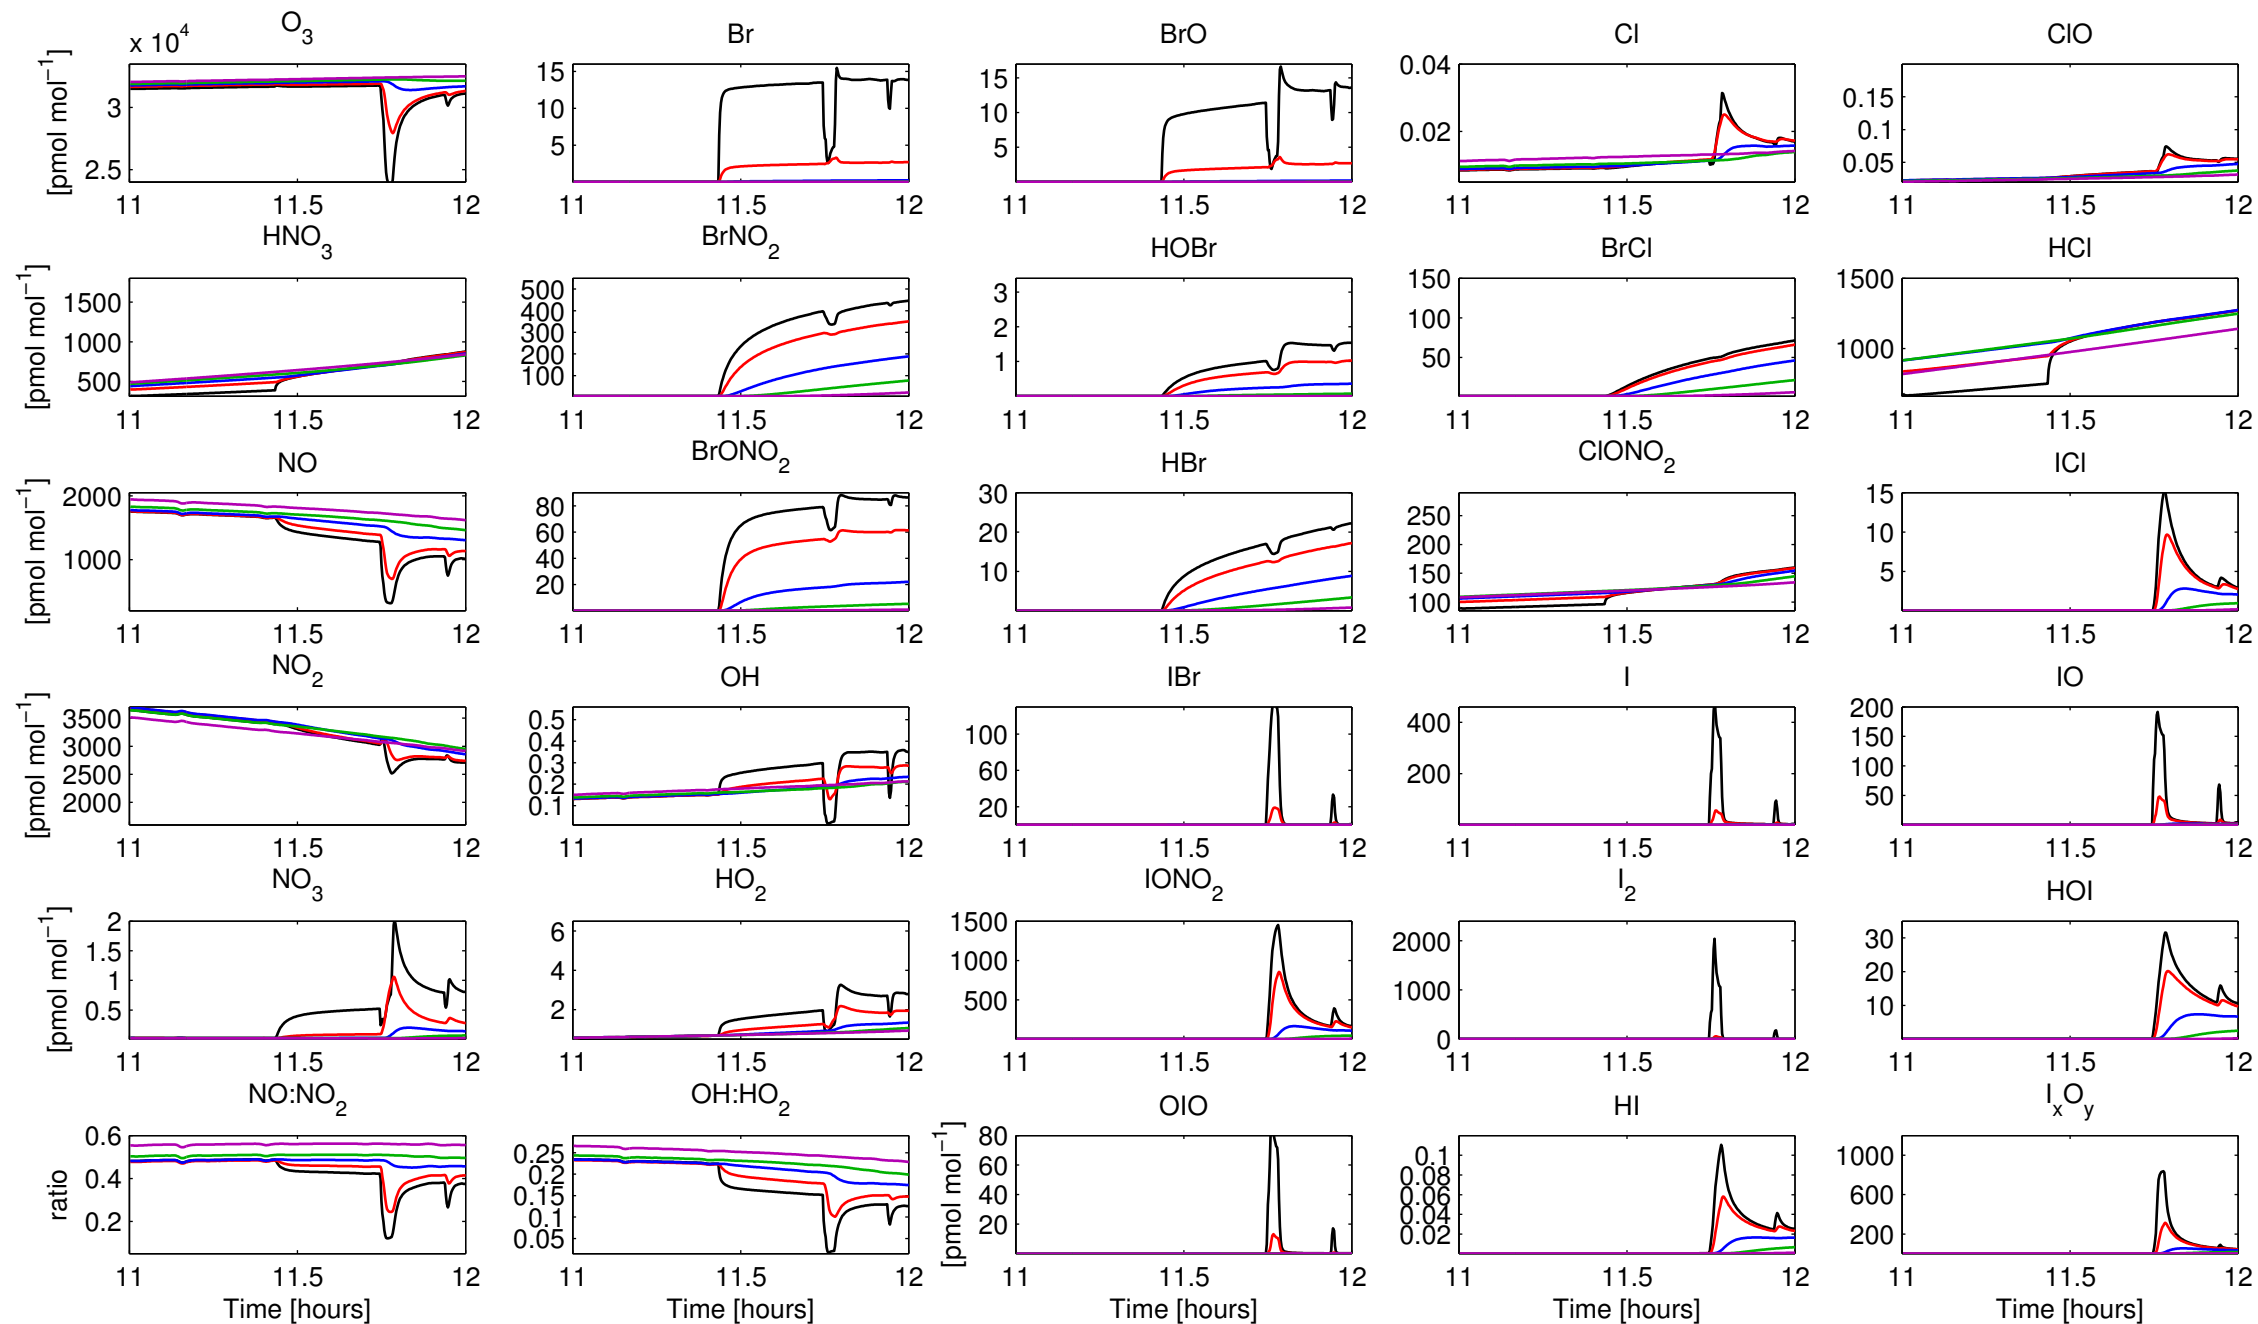

## I2 Recycling Scheme, Low Tide, First I2 Emission Scenario

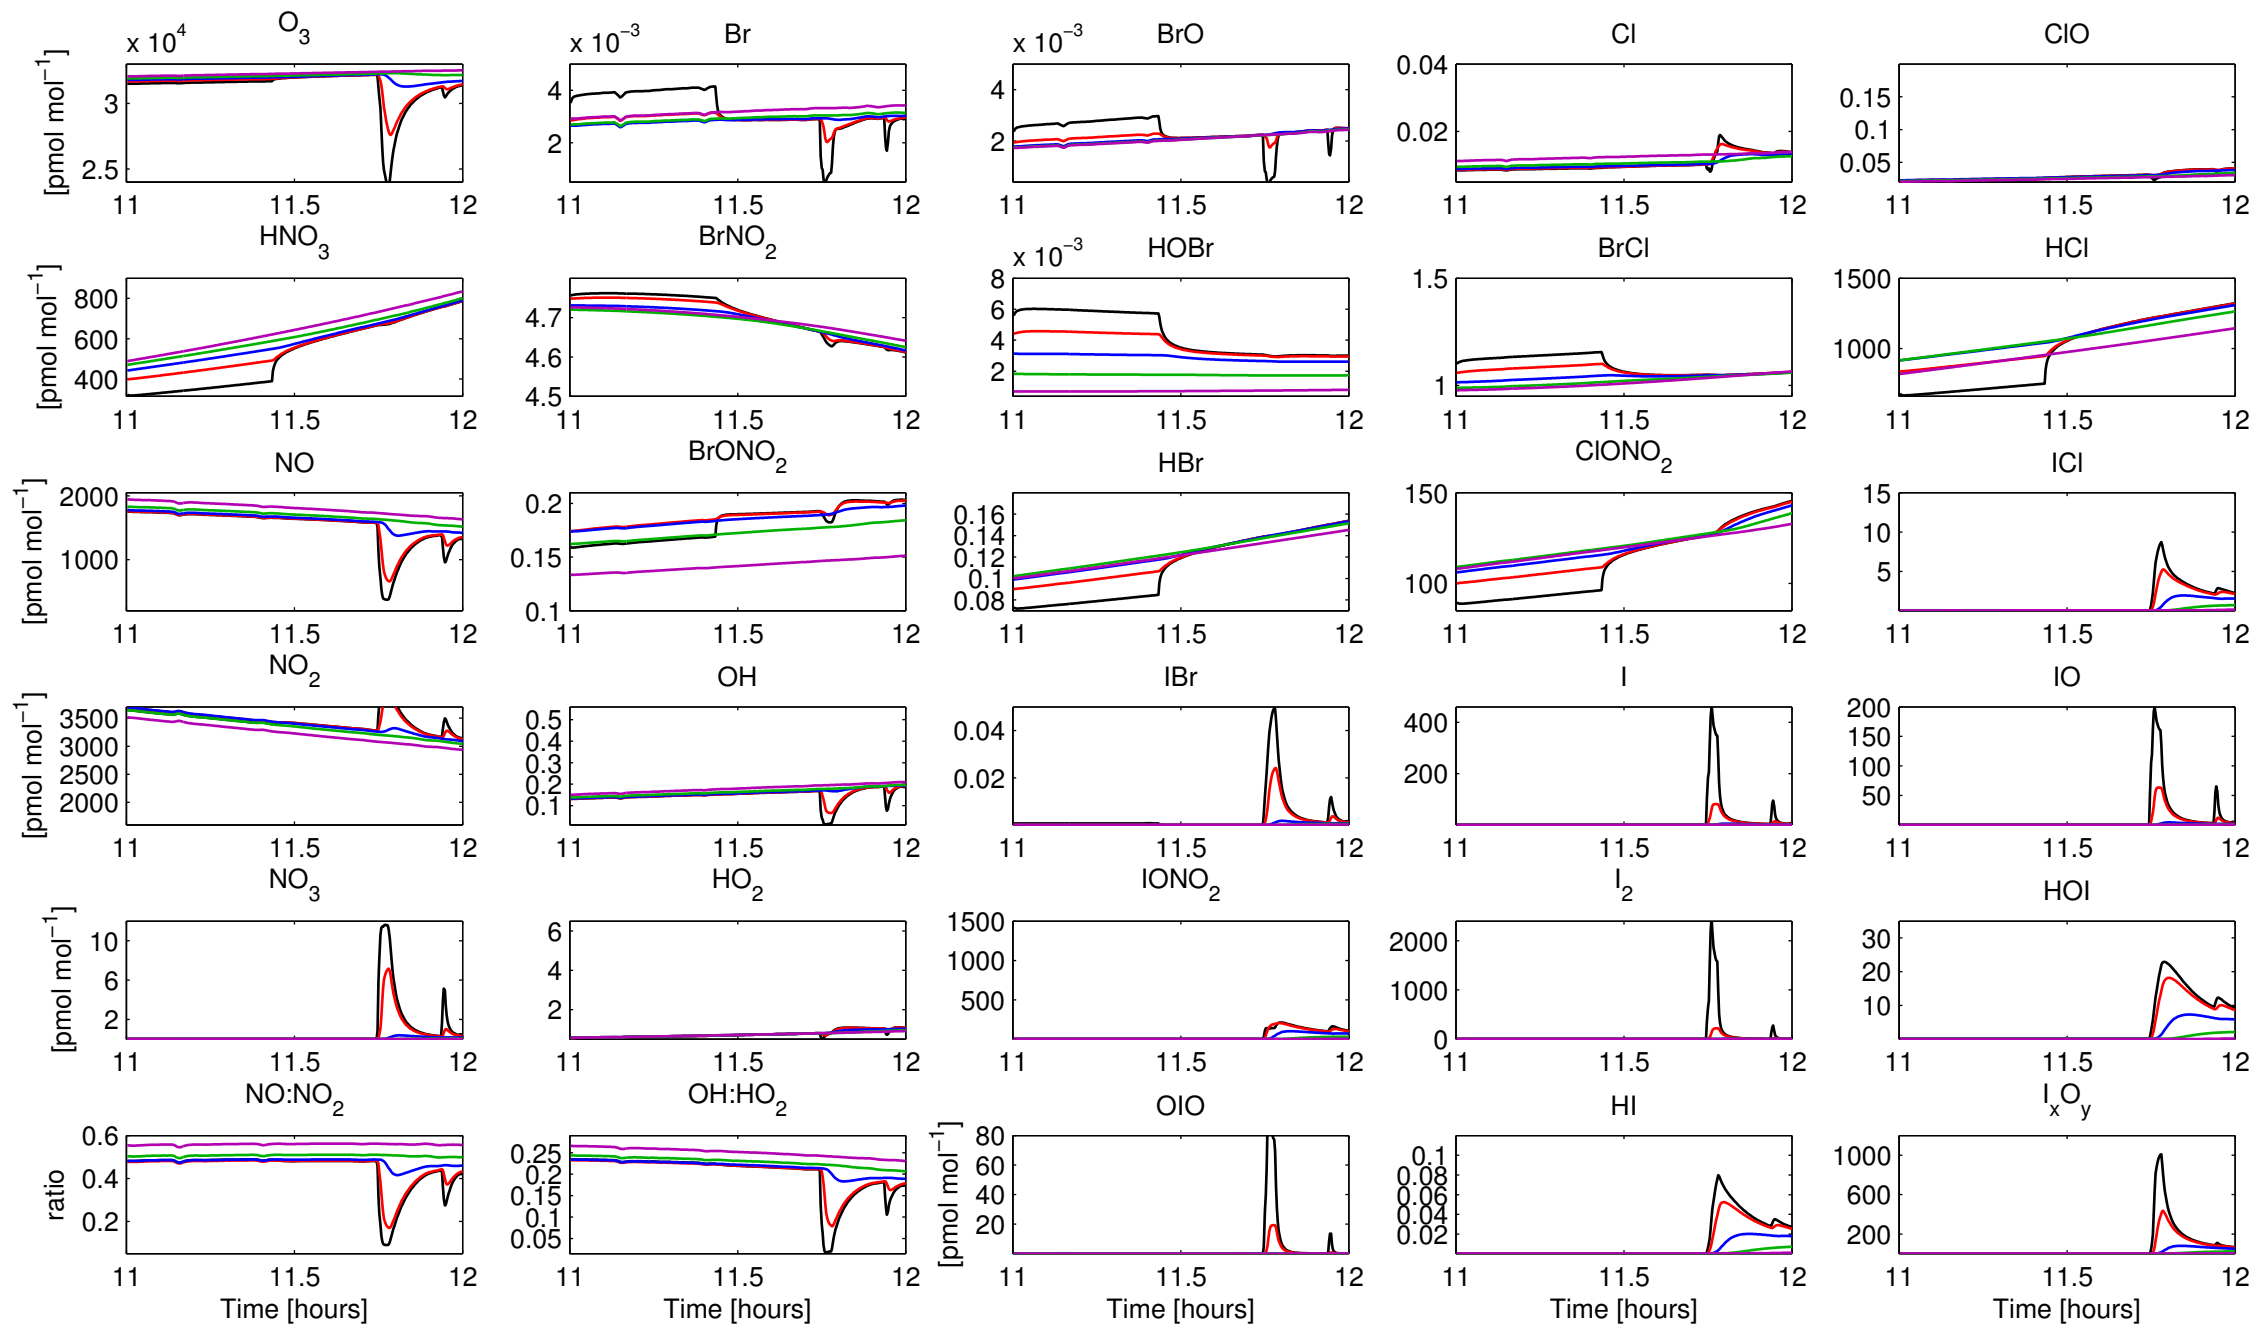





### Base Chemistry Scheme, Low Tide, Second I2 Emission Scenario

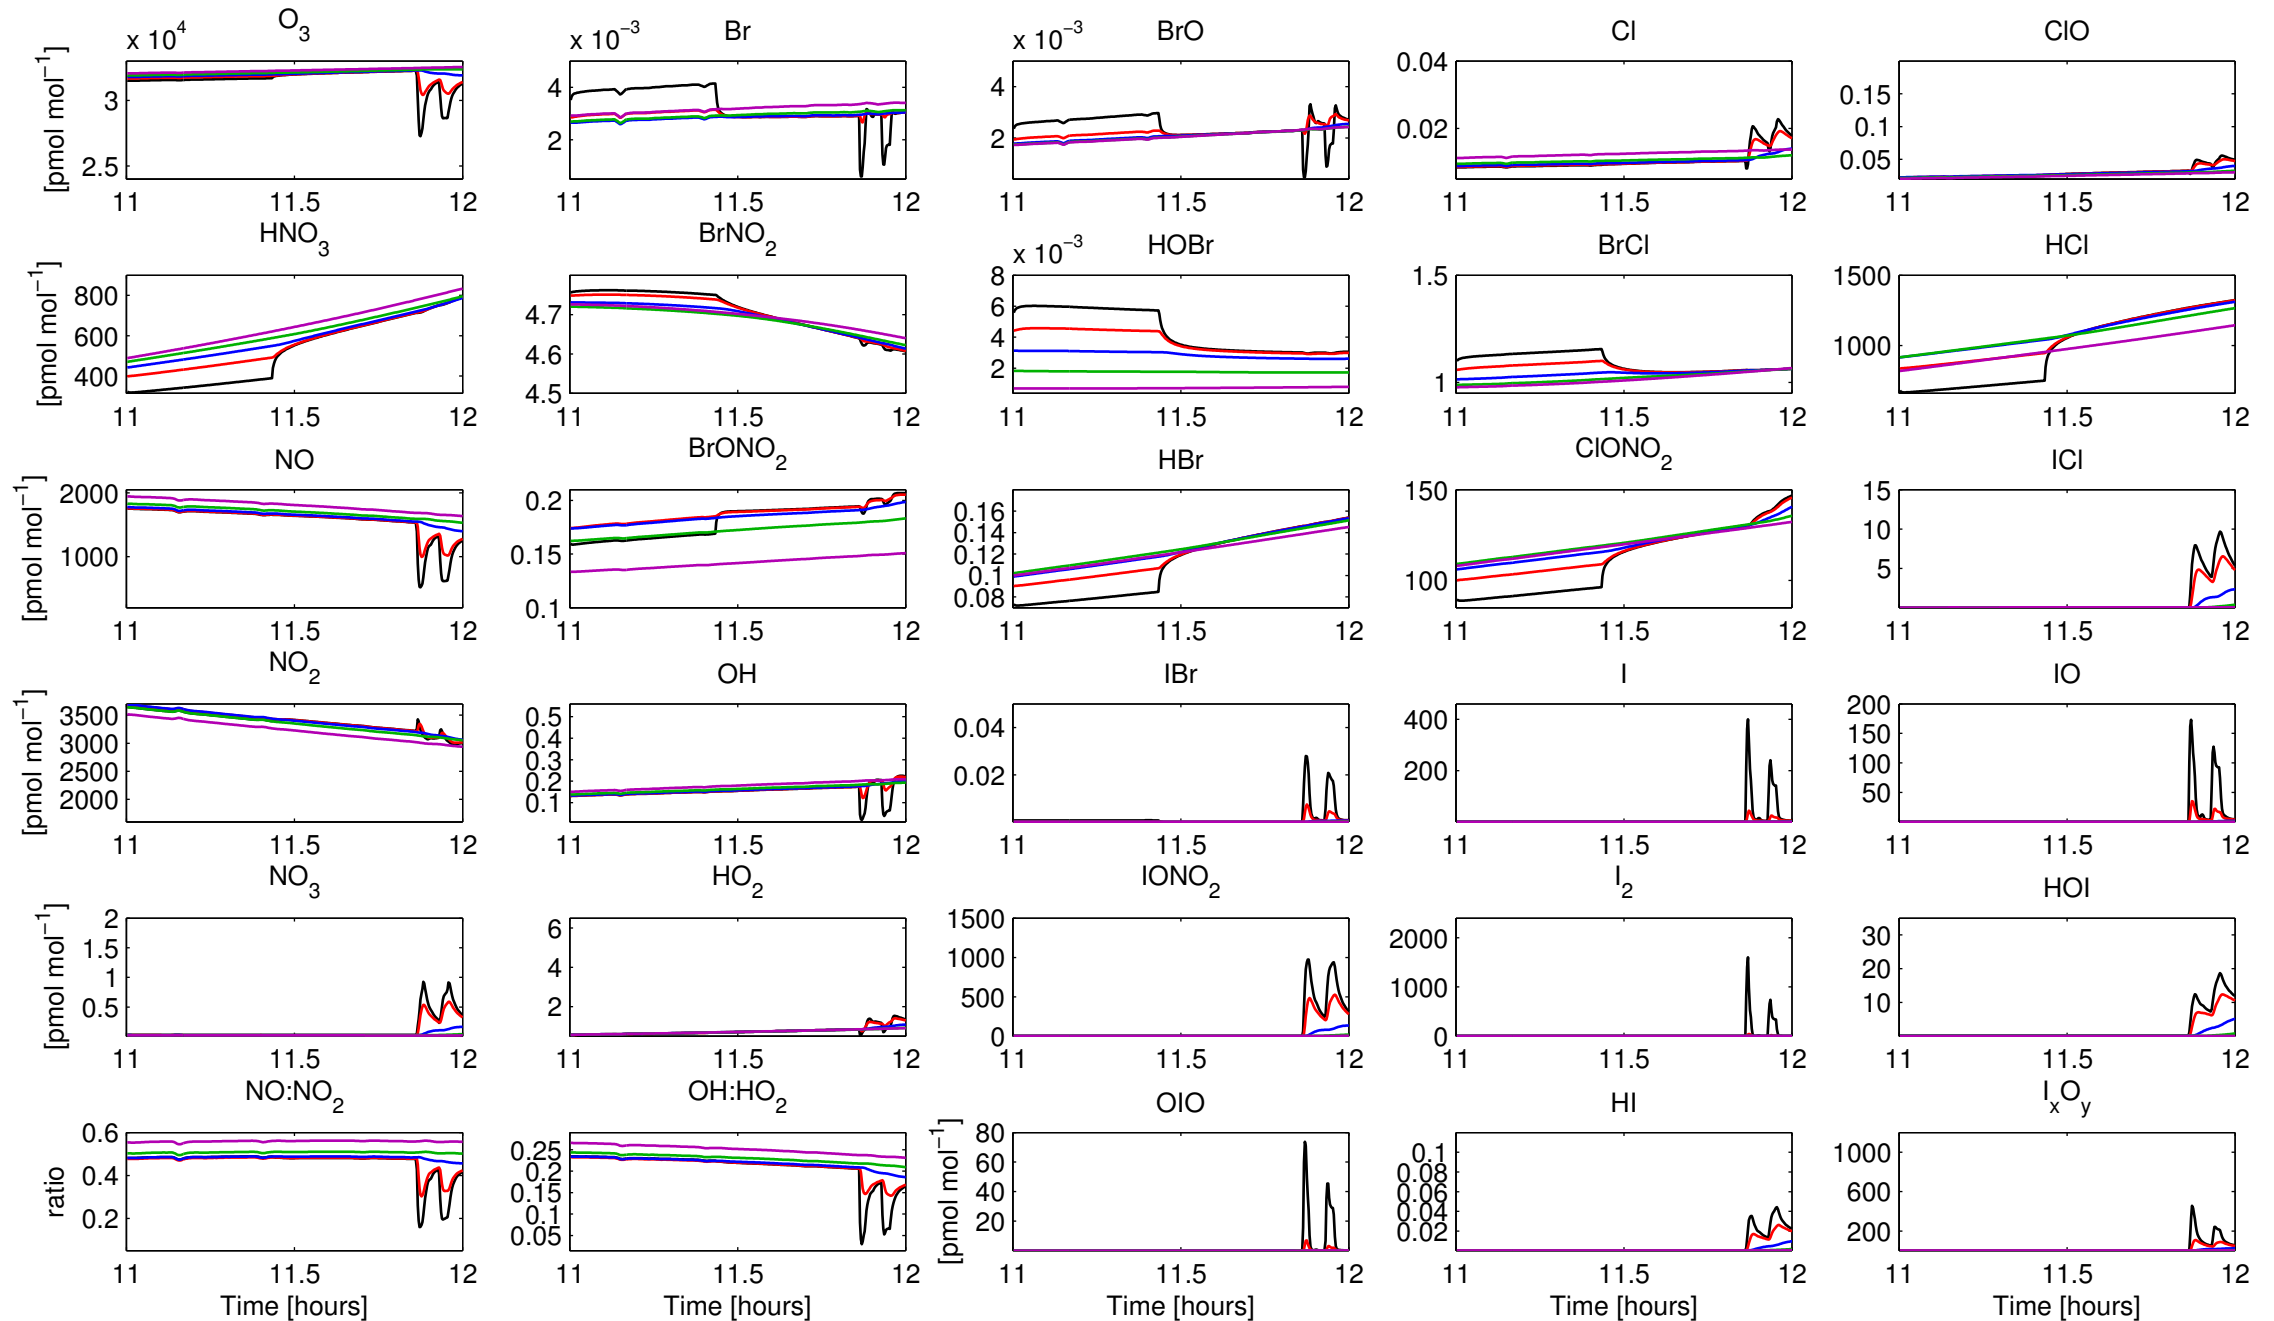

I2 Recycling Scheme, Low Tide, Second I2 Emission Scenario

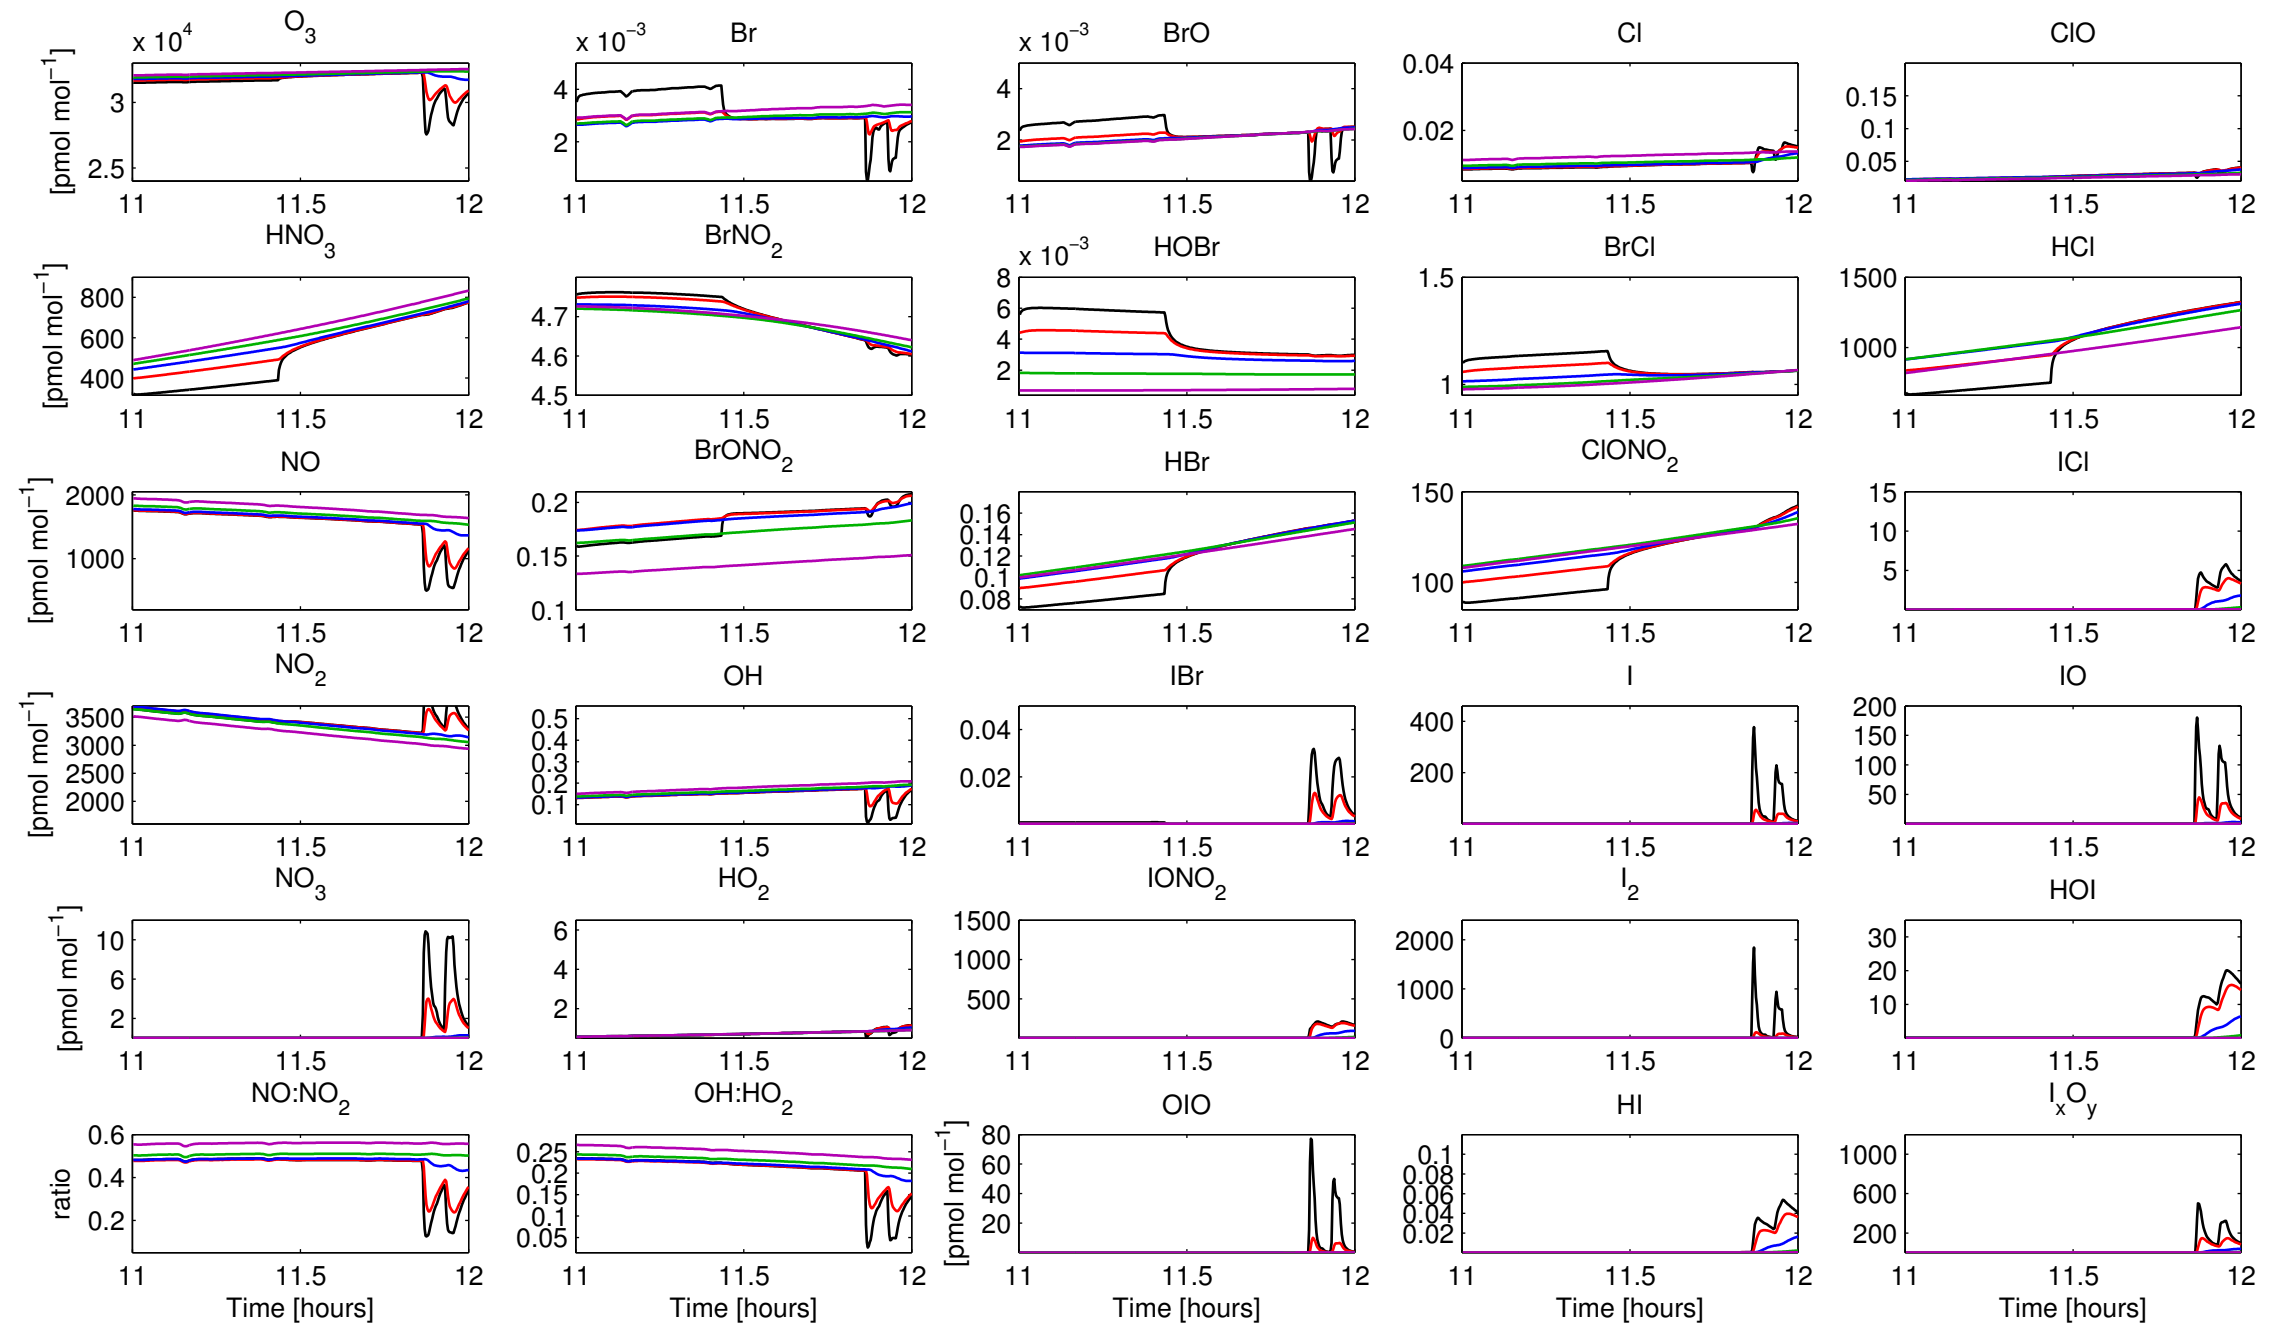

## Base Chemistry Scheme, Low Tide, Second I2 Emission Scenario, Low Photolysis Rates

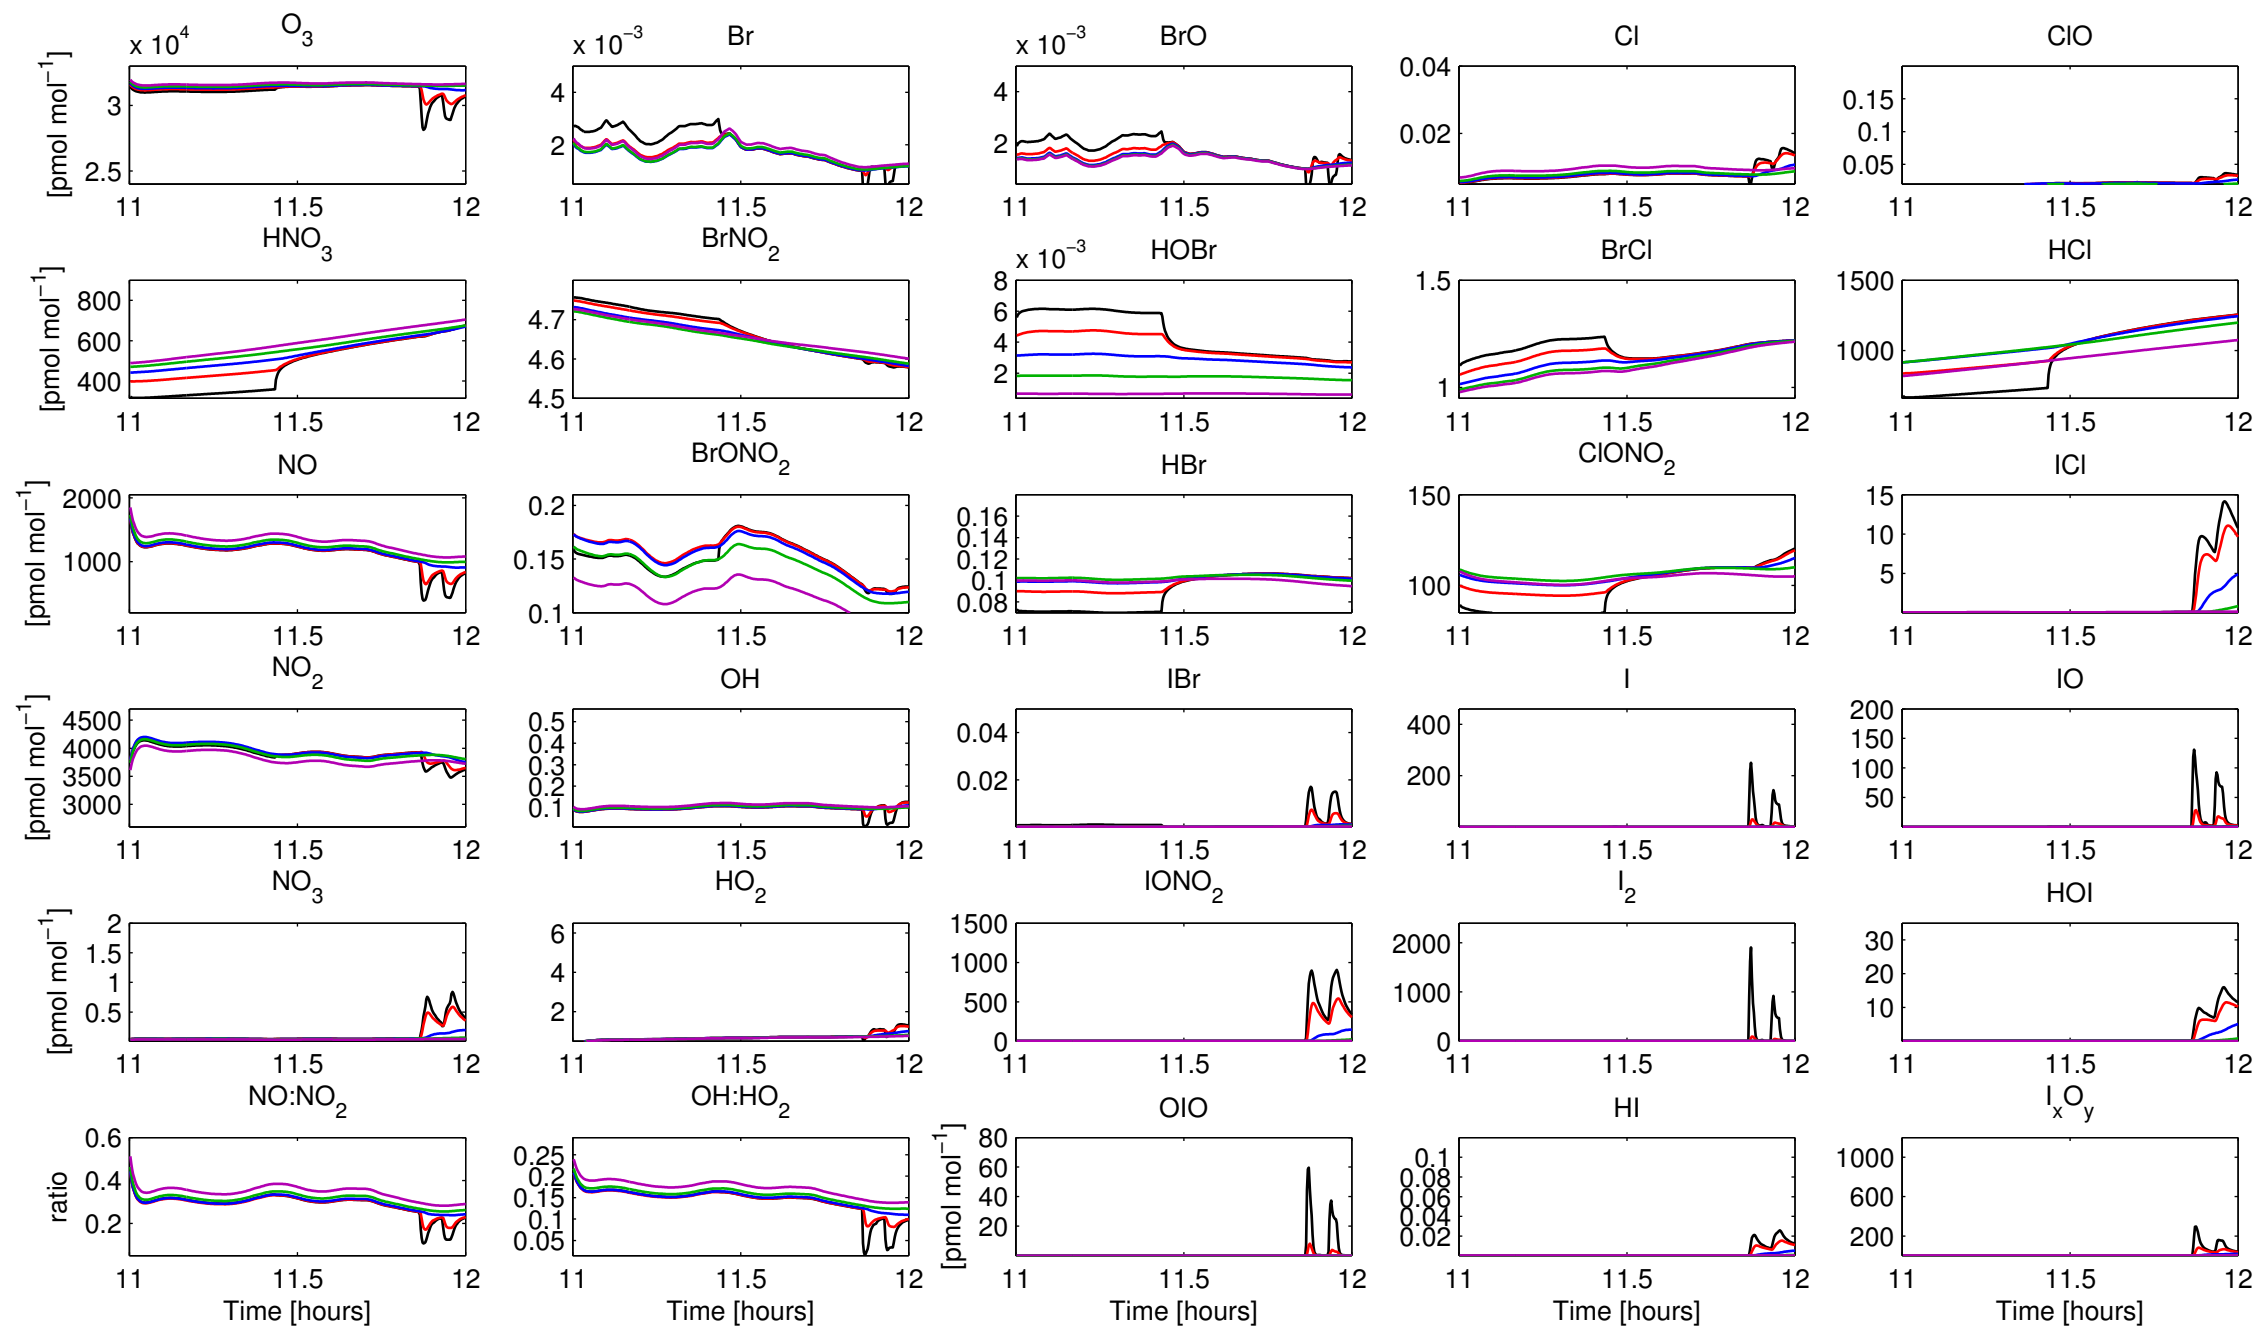

## I2 Recycling Scheme, Low Tide, Second I2 Emission Scenario, Low Photolysis Rates

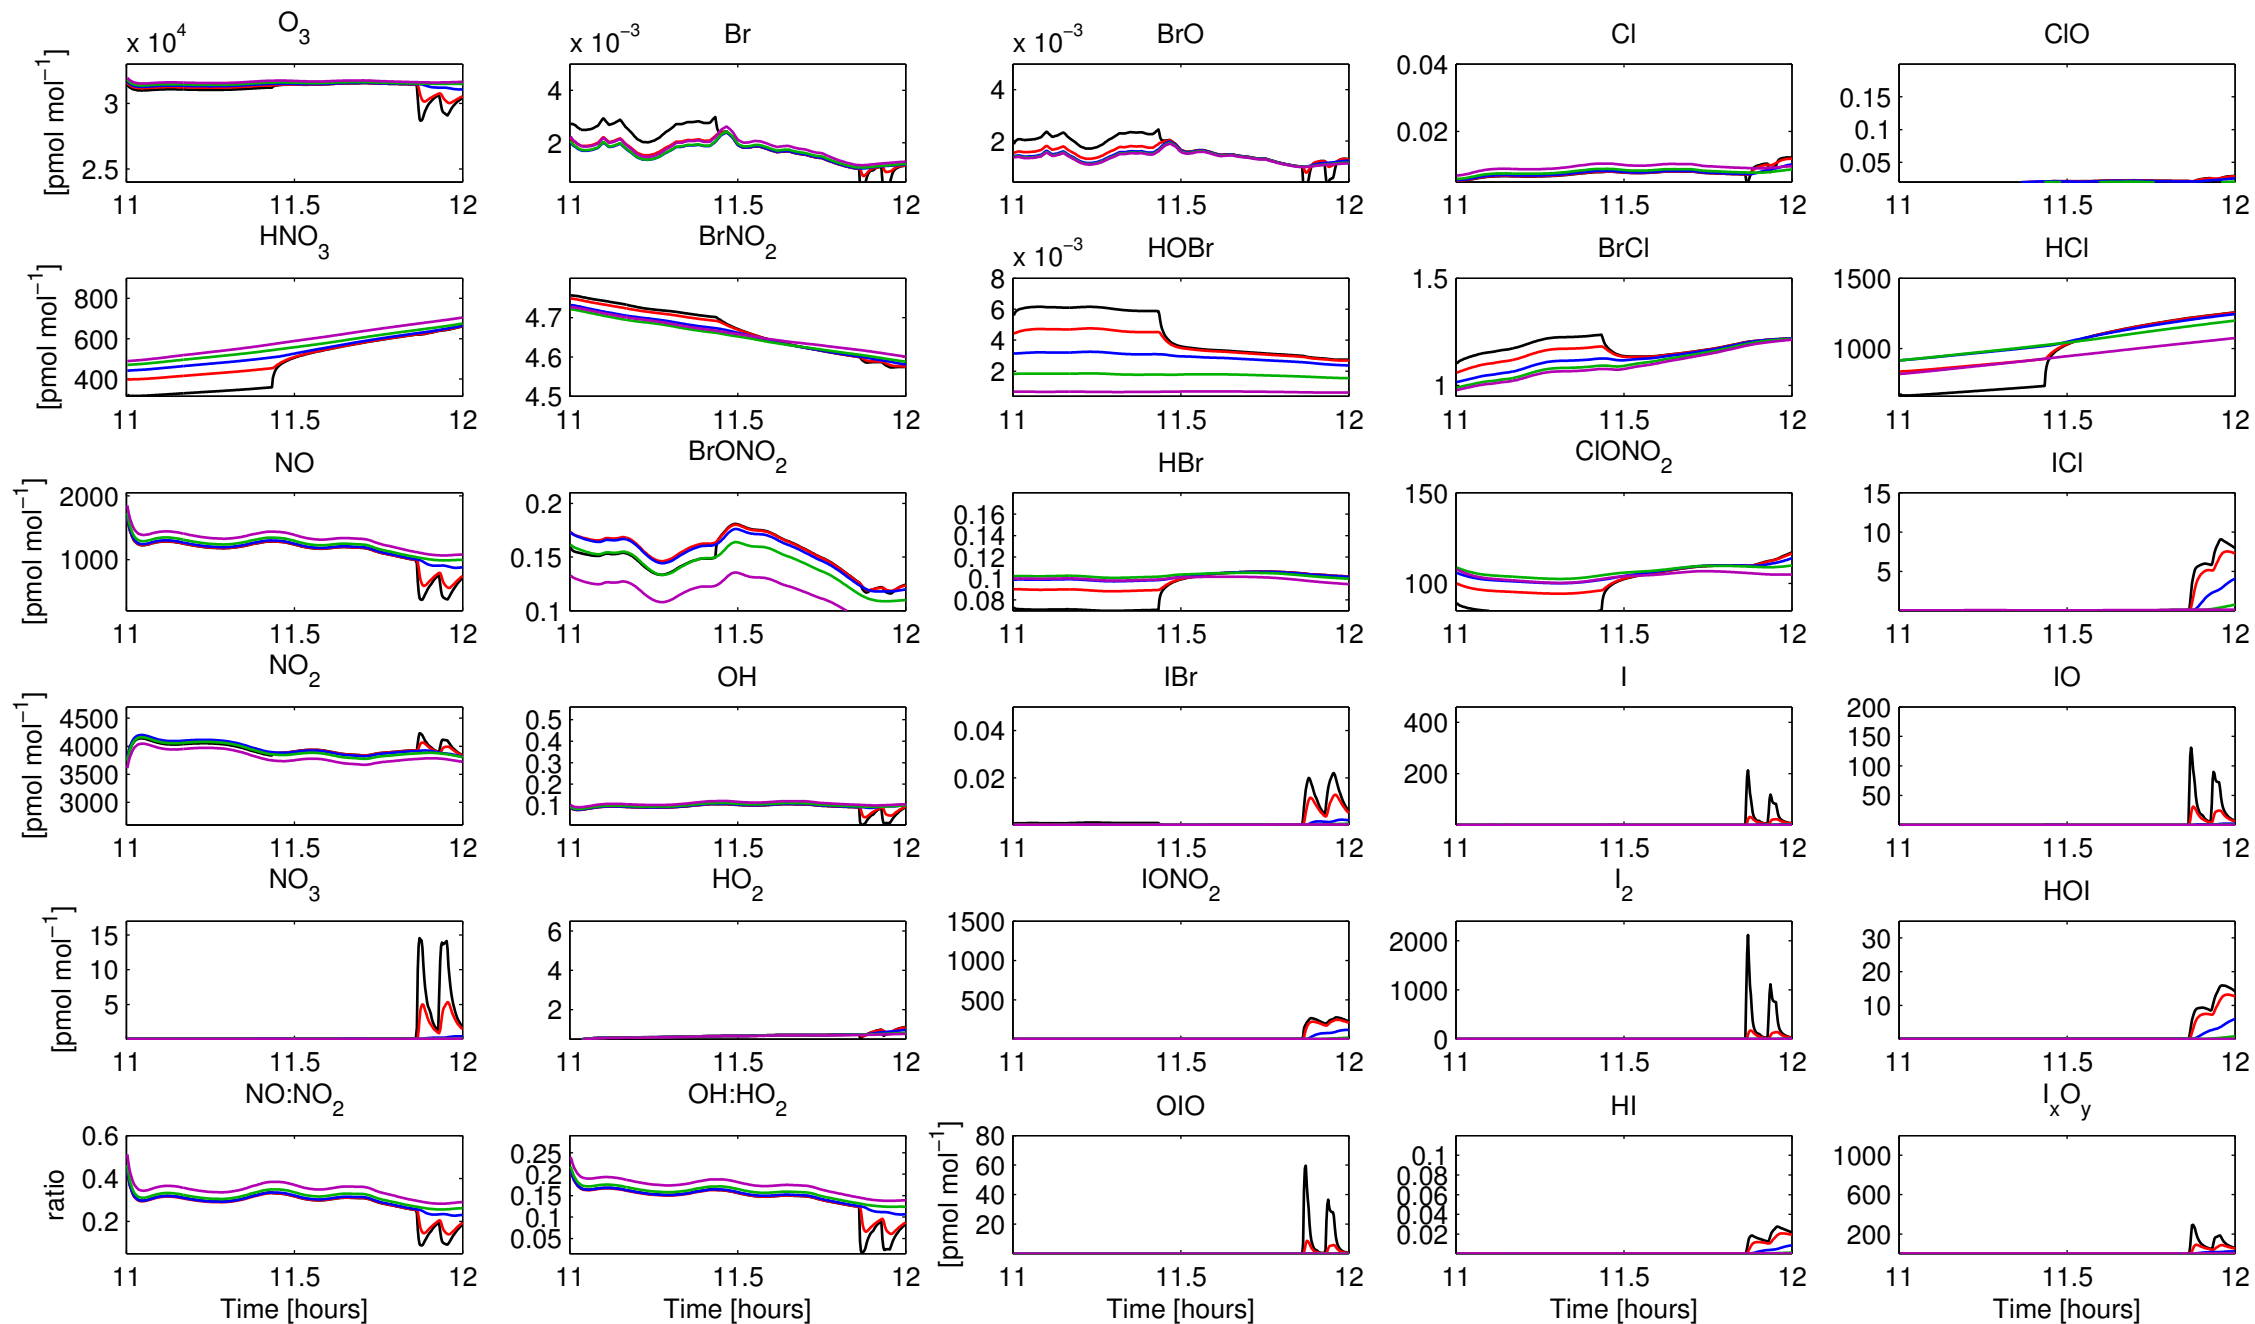

Supplement: Supplementary file 1 [file acp-11-979-2011-supplement.zip › gas_plots.pdf]
