# Supplementary material for: Modelling multi-phase halogen chemistry in the coastal marine boundary layer: investigation of the relative importance of local chemistry vs. long-range transport
Source: Copernicus journal article supplement (doi:10.5194/acp-11-979-2011), 2011-02-02
Supplement: Supplementary file 1 [file acp-11-979-2011-supplement.zip › lowe-rhamble-scheme.pdf]

# Kinetic data for MANIC

January 9, 2011

*supplemental material to:*

D. Lowe, J. Ryder, R. Leigh, J. R. Dorsey, and G. McFiggans

Modelling multi-phase halogen chemistry in the coastal marine boundary layer: investigation of the relative importance of local chemistry vs long-range transport.

*Atmos. Chem. Phys.*, 2010

# 1 Chemistry Scheme

This collection comprises a complete listing of all gas and aqueous phase species (Table 1), gas phase (Table 2) and aqueous phase (Table 3) reaction rates, as well as rates for the heterogeneous (particle surface) reactions (Table 4), aqueous phase equilibrium constants (Table 5), Henry constants and accommodation coefficients (Table 6). Unless otherwise indicated, the chemical rate constants are taken from Pechtl et al. (2006).

Table 1: Species

| Gas phase                                                                                                                                                                                                 |
|-----------------------------------------------------------------------------------------------------------------------------------------------------------------------------------------------------------|
| $O^1D$ , $O_2$ , $O_3$ , $OH$ , $HO_2$ , $H_2O_2$ , $H_2O$                                                                                                                                                |
| $NO$ , $NO_2$ , $NO_3$ , $N_2O_5$ , $HONO$ , $HNO_3$ , $HNO_4$ , $PAN$ , $NH_3$                                                                                                                           |
| $CO$ , $CO_2$ , $CH_4$ , $C_2H_6$ , $C_2H_4$ , $HCHO$ , $HCOOH$ , $ALD$ , $HOCH_2O_2$ , $CH_3CO_3$ , $CH_3O_2$ , $C_2H_5O_2$ , $EO_2$ , $ROOH$                                                            |
| $SO_2$ , $SO_3$ , $HOSO_2$ , $H_2SO_4$ , $DMS$ , $CH_3SCH_2OO$ , $DMSO$ , $DMSO_2$ , $CH_3S$ , $CH_3SO$ , $CH_3SO_2$ , $CH_3SO_3$ , $CH_3SO_2H$ , $CH_3SO_3H$                                             |
| $Cl$ , $ClO$ , $OCIO$ , $HCl$ , $HOCl$ , $Cl_2$ , $Cl_2O_2$ , $ClNO_2$ , $ClONO_2$                                                                                                                        |
| $Br$ , $BrO$ , $HBr$ , $HOBr$ , $Br_2$ , $BrNO_2$ , $BrONO_2$ , $BrCl$                                                                                                                                    |
| $I$ , $IO$ , $OIO$ , $HI$ , $HOI$ , $INO_2$ , $IONO_2$ , $I_2$ , $ICl$ , $IBr$ , $HIO_3$ , $CH_3I$ , $C_2H_5I$ , $C_3H_7I$ , $CH_3CI$ , $CH_2BrI$ , $CH_2I_2$ , $I_2O_2$ , $I_2O_3$ , $I_2O_4$ , $I_2O_5$ |
| Liquid phase (neutral)                                                                                                                                                                                    |
| $O_2$ , $O_3$ , $OH$ , $HO_2$ , $H_2O_2$ , $H_2O$                                                                                                                                                         |
| $NO$ , $NO_2$ , $NO_3$ , $HONO$ , $HNO_3$ , $HNO_4$ , $NH_3$                                                                                                                                              |
| $CO_2$ , $HCHO$ , $HCOOH$ , $CH_3OH$ , $CH_3OO$ , $CH_3OOH$ , $DOM$ , $ROOH$                                                                                                                              |
| $SO_2$ , $H_2SO_4$ , $DMS$ , $DMSO$ , $DMSO_2$ , $CH_3SO_2H$ , $CH_3SO_3H$                                                                                                                                |
| $Cl$ , $HCl$ , $HOCl$ , $Cl_2$                                                                                                                                                                            |
| $Br$ , $HBr$ , $HOBr$ , $Br_2$ , $BrCl$                                                                                                                                                                   |
| $IO$ , $HI$ , $HOI$ , $I_2$ , $ICl$ , $IBr$                                                                                                                                                               |
| Liquid phase (ions)                                                                                                                                                                                       |
| $H^+$ , $OH^-$ , $O_2^-$ , $HO_2^-$                                                                                                                                                                       |
| $NO_2^-$ , $NO_3^-$ , $NO_4^-$ , $NH_4^+$                                                                                                                                                                 |
| $HCO_3^-$ , $CO_3^-$ , $HCOO^-$                                                                                                                                                                           |
| $HSO_3^-$ , $SO_3^{2-}$ , $HSO_4^-$ , $SO_4^{2-}$ , $HSO_5^-$ , $SO_3^-$ , $SO_4^-$ , $SO_5^-$ , $CH_3SO_3^-$ , $CH_2OHSO_2^-$ , $CH_2OHSO_3^-$                                                           |
| $Cl^-$ , $Cl_2^-$ , $ClO^-$ , $ClOH^-$                                                                                                                                                                    |
| $Br^-$ , $Br_2^-$ , $BrO^-$ , $BrCl_2^-$ , $Br_2Cl^-$ , $BrOH^-$                                                                                                                                          |
| $I^-$ , $IO_2^-$ , $IO_3^-$ , $ICl_2^-$ , $IBr_2^-$ , $IClBr^-$                                                                                                                                           |

Table 2: Gas phase reactions.

| no   | reaction                                                       | $n$ | $A [(cm^{-3})^{1-n}s^{-1}]$ | $-E_a/R [K]$ | reference            |
|------|----------------------------------------------------------------|-----|-----------------------------|--------------|----------------------|
| O 1  | $O^1D + O_2 \longrightarrow O_3$                               | 2   | $3.2 \times 10^{-11}$       | 70           |                      |
| O 2  | $O^1D + N_2 \longrightarrow O_3$                               | 2   | $1.8 \times 10^{-11}$       | 110          |                      |
| O 3  | $O^1D + H_2O \longrightarrow 2OH$                              | 2   | $2.2 \times 10^{-10}$       |              |                      |
| O 4  | $OH + O_3 \longrightarrow HO_2 + O_2$                          | 2   | $1.7 \times 10^{-12}$       | -940         |                      |
| O 5  | $OH + HO_2 \longrightarrow H_2O + O_2$                         | 2   | $4.8 \times 10^{-11}$       | 250          |                      |
| O 6  | $OH + H_2O_2 \longrightarrow HO_2 + H_2O$                      | 2   | $2.9 \times 10^{-12}$       | -160         |                      |
| O 7  | $HO_2 + O_3 \longrightarrow OH + 2O_2$                         | 2   | $1.0 \times 10^{-14}$       | -490         |                      |
| O 8  | $HO_2 + HO_2 \longrightarrow H_2O_2 + O_2$                     | 2   | $2.3 \times 10^{-13}$       | 600          |                      |
| O 9  | $O_3 + hv \longrightarrow O_2 + O^1D$                          | 1   | 1                           |              |                      |
| O 10 | $H_2O_2 + hv \longrightarrow 2OH$                              | 1   | 1                           |              |                      |
| N 1  | $NO + OH \xrightarrow{M} HONO$                                 | 3   | 2                           |              | Sander et al. (2006) |
| N 2  | $NO + HO_2 \longrightarrow NO_2 + OH$                          | 2   | $3.5 \times 10^{-12}$       | 250          |                      |
| N 3  | $NO + O_3 \longrightarrow NO_2 + O_2$                          | 2   | $3.0 \times 10^{-12}$       | -1500        |                      |
| N 4  | $NO + NO_3 \longrightarrow 2NO_2$                              | 2   | $1.5 \times 10^{-11}$       | 170          |                      |
| N 5  | $NO_2 + OH \xrightarrow{M} HNO_3$                              | 3   | 2                           |              | Sander et al. (2006) |
| N 6  | $NO_2 + HO_2 \xrightarrow{M} HNO_4$                            | 3   | 2                           |              | Sander et al. (2006) |
| N 7  | $NO_2 + O_3 \longrightarrow NO_3 + O_2$                        | 2   | $1.2 \times 10^{-13}$       | -2450        |                      |
| N 8  | $NO_2 + hv \longrightarrow NO + O_3$                           | 1   | 1                           |              |                      |
| N 9  | $NO_2 + NO_3 \xrightarrow{M} N_2O_5$                           | 3   | 2                           |              | Sander et al. (2006) |
| N 10 | $NO_3 + hv \longrightarrow NO + O_3$                           | 1   | 1                           |              |                      |
| N 11 | $NO_3 + HO_2 \longrightarrow 0.3HNO_3 + 0.7OH + 0.7NO_2 + O_2$ | 2   | $4.0 \times 10^{-12}$       |              |                      |
| N 12 | $NO_3 + NO_3 \longrightarrow NO_2 + NO_2 + O_2$                | 2   | $8.5 \times 10^{-13}$       | -2450        |                      |
| N 13 | $NO_3 + hv \longrightarrow NO_2 + O_3$                         | 1   | 1                           |              |                      |
| N 14 | $N_2O_5 \xrightarrow{M} NO_2 + NO_3$                           | 2   | 2                           |              |                      |
| N 15 | $N_2O_5 + H_2O \longrightarrow 2HNO_3$                         | 2   | $2.6 \times 10^{-22}$       |              |                      |
| N 16 | $N_2O_5 + hv \longrightarrow NO_2 + NO_3$                      | 1   | 1                           |              |                      |
| N 17 | $HONO + OH \longrightarrow NO_2$                               | 2   | $1.8 \times 10^{-11}$       | -390         |                      |
| N 18 | $HONO + hv \longrightarrow NO + OH$                            | 1   | 1                           |              |                      |
| N 19 | $HNO_3 + hv \longrightarrow NO_2 + OH$                         | 1   | 1                           |              |                      |

Table 2: Continued

| no   | reaction                                                                          | $n$ | $A [(cm^{-3})^{1-n} s^{-1}]$ | $-E_a/R [K]$ | reference                      |
|------|-----------------------------------------------------------------------------------|-----|------------------------------|--------------|--------------------------------|
| N 20 | $HNO_3 + OH \longrightarrow NO_3 + H_2O$                                          | 2   | 2                            |              | Sander et al. (2006)           |
| N 21 | $HNO_4 \xrightarrow{M} NO_2 + HO_2$                                               | 2   | 2                            |              | Sander et al. (2006), see note |
| N 22 | $HNO_4 + OH \longrightarrow NO_2 + H_2O + O_2$                                    | 2   | $1.3 \times 10^{-12}$        | 380          |                                |
| N 23 | $HNO_4 + hv \longrightarrow NO_2 + HO_2$                                          | 1   | 1                            |              |                                |
| N 24 | $HNO_4 + hv \longrightarrow OH + NO_3$                                            | 1   | 1                            |              |                                |
| C 1  | $CO + OH \xrightarrow{O_2} HO_2 + CO_2$                                           | 2   | 2                            |              | Sander et al. (2006)           |
| C 2  | $CH_4 + OH \xrightarrow{O_2} CH_3OO + H_2O$                                       | 2   | $2.4 \times 10^{-12}$        | -1175        |                                |
| C 3  | $C_2H_6 + OH \longrightarrow C_2H_5O_2 + H_2O$                                    | 2   | $1.7 \times 10^{-11}$        | -1232        |                                |
| C 4  | $C_2H_4 + OH \longrightarrow EO_2$                                                | 2   | $1.66 \times 10^{-12}$       | 474          |                                |
| C 5  | $C_2H_4 + O_3 \longrightarrow HCHO + 0.4HCOOH + 0.12HO_2$<br>$+0.42CO + 0.06CH_4$ | 2   | $1.2 \times 10^{-14}$        | -2633        |                                |
| C 6  | $HO_2 + CH_3OO \longrightarrow ROOH + O_2$                                        | 2   | $4.1 \times 10^{-13}$        | 750          |                                |
| C 7  | $HO_2 + C_2H_5O_2 \longrightarrow ROOH + O_2$                                     | 2   | $7.5 \times 10^{-13}$        | 700          |                                |
| C 8  | $HO_2 + CH_3CO_3 \longrightarrow ROOH + O_2$                                      | 2   | $4.5 \times 10^{-13}$        | 1000         |                                |
| C 9  | $CH_3OO + CH_3OO \longrightarrow 1.4HCHO + 0.8HO_2 + O_2$                         | 2   | $1.5 \times 10^{-13}$        | 220          |                                |
| C 10 | $C_2H_5O_2 + NO \longrightarrow ALD + HO_2 + NO_2$                                | 2   | $4.2 \times 10^{-12}$        | 180          |                                |
| C 11 | $2C_2H_5O_2 \longrightarrow 1.6ALD + 1.2HO_2$                                     | 2   | $5.00 \times 10^{-14}$       |              |                                |
| C 12 | $EO_2 + NO \longrightarrow NO_2 + 2HCHO + O_2$                                    | 2   | $4.2 \times 10^{-12}$        | 180          |                                |
| C 13 | $EO_2 + EO_2 \longrightarrow 2.4HCHO + 1.2HO_2 + 0.4ALD$                          | 2   | $5.00 \times 10^{-14}$       |              |                                |
| C 14 | $HO_2 + EO_2 \longrightarrow ROOH + O_2$                                          | 2   | $3.00 \times 10^{-12}$       |              |                                |
| C 15 | $HCHO + hv \longrightarrow 2HO_2 + CO$                                            | 1   | 1                            |              |                                |
| C 16 | $HCHO + hv \longrightarrow CO + H_2$                                              | 1   | 1                            |              |                                |
| C 17 | $HCHO + OH \xrightarrow{O_2} HO_2 + CO + H_2O$                                    | 2   | $1.00 \times 10^{-11}$       |              |                                |
| C 18 | $HCHO + HO_2 \longrightarrow HOCH_2O_2$                                           | 2   | $6.7 \times 10^{-15}$        | 600          |                                |
| C 19 | $HCHO + NO_3 \xrightarrow{O_2} HNO_3 + HO_2 + CO$                                 | 2   | $5.8 \times 10^{-16}$        |              |                                |
| C 20 | $ALD + OH \longrightarrow CH_3CO_3 + H_2O$                                        | 2   | $6.9 \times 10^{-12}$        | 250          |                                |
| C 21 | $ALD + NO_3 \longrightarrow HNO_3 + CH_3CO_3$                                     | 2   | $1.40 \times 10^{-15}$       |              |                                |
| C 22 | $ALD + hv \longrightarrow CH_3OO + HO_2 + CO$                                     | 1   | 1                            |              |                                |
| C 23 | $ALD + hv \longrightarrow CH_4 + CO$                                              | 1   | 1                            |              |                                |

Table 2: Continued

| no   | reaction                                                                    | $n$ | $A [(cm^{-3})^{1-n} s^{-1}]$          | $-E_a/R [K]$ | reference                        |
|------|-----------------------------------------------------------------------------|-----|---------------------------------------|--------------|----------------------------------|
| C 24 | $HOCH_2O_2 + NO \longrightarrow HCOOH + HO_2 + NO_2$                        | 2   | $4.2 \times 10^{-12}$                 | 180          |                                  |
| C 25 | $HOCH_2O_2 + HO_2 \longrightarrow HCOOH + H_2O + O_2$                       | 2   | $2.00 \times 10^{-12}$                |              |                                  |
| C 26 | $2HOCH_2O_2 \longrightarrow 2HCOOH + HO_2 + 2O_2$                           | 2   | $1.00 \times 10^{-13}$                |              |                                  |
| C 27 | $HCOOH + OH \xrightarrow{O_2} HO_2 + H_2O + CO_2$                           | 2   | $4.0 \times 10^{-13}$                 |              |                                  |
| C 28 | $CH_3CO_3 + NO_2 \longrightarrow PAN$                                       | 2   | $4.70 \times 10^{-12}$                |              |                                  |
| C 29 | $PAN \longrightarrow CH_3CO_3 + NO_2$                                       | 1   | $1.9 \times 10^{16}$                  | -13543       |                                  |
| C 30 | $CH_3CO_3 + NO \longrightarrow CH_3OO + NO_2 + CO_2$                        | 2   | $4.2 \times 10^{-12}$                 | 180          |                                  |
| C 31 | $CH_3OO + NO \xrightarrow{O_2} HCHO + NO_2 + HO_2$                          | 2   | $3.0 \times 10^{-12}$                 | 280          |                                  |
| C 32 | $ROOH + OH \longrightarrow 0.7CH_3OO + 0.3HCHO + 0.3OH$                     | 2   | $3.8 \times 10^{-12}$                 | 200          |                                  |
| C 33 | $ROOH+h\nu \longrightarrow HCHO + OH + HO_2$                                | 1   |                                       |              |                                  |
| S 1  | $SO_2 + OH \xrightarrow{M} HOSO_2$                                          | 3   |                                       |              | Atkinson et al. (2006)           |
| S 2  | $HOSO_2 + O_2 \longrightarrow HO_2 + SO_3$                                  | 2   | $1.3 \times 10^{-12}$                 | 330          |                                  |
| S 3  | $SO_3 \xrightarrow{H_2O} H_2SO_4$                                           | 1   | $3.9 \times 10^{-41} \times [H_2O]^2$ | 6830.6       | Jayne et al. (1997)              |
| S 4  | $CH_3SCH_3 + OH \longrightarrow CH_3SCH_2OO + H_2O$                         | 2   | $1.12 \times 10^{-11}$                | -250         | Atkinson et al. (2006), see note |
| S 5  | $CH_3SCH_3 + OH \xrightarrow{O_2} CH_3SOCH_3 + HO_2$                        | 3   |                                       |              | Atkinson et al. (2006)           |
| S 6  | $CH_3SCH_3 + NO_3 \xrightarrow{O_2} CH_3SCH_2OO + HNO_3$                    | 2   | $1.9 \times 10^{-13}$                 | 520          |                                  |
| S 7  | $CH_3SCH_3 + Cl \xrightarrow{O_2} CH_3SCH_2OO + HCl$                        | 2   | $3.3 \times 10^{-10}$                 |              |                                  |
| S 8  | $CH_3SCH_3 + Br \xrightarrow{O_2} CH_3SCH_2OO + HBr$                        | 2   | $9.0 \times 10^{-11}$                 | -2386        |                                  |
| S 9  | $CH_3SCH_3 + BrO \longrightarrow CH_3SOCH_3 + Br$                           | 2   | $2.54 \times 10^{-14}$                | 850          |                                  |
| S 10 | $CH_3SCH_3 + ClO \longrightarrow CH_3SOCH_3 + Cl$                           | 2   | $9.5 \times 10^{-15}$                 |              |                                  |
| S 11 | $CH_3SCH_3 + IO \longrightarrow CH_3SOCH_3 + I$                             | 2   | $1.4 \times 10^{-14}$                 |              |                                  |
| S 12 | $CH_3SCH_2OO + NO \longrightarrow HCHO + CH_3S + NO_2$                      | 2   | $4.9 \times 10^{-12}$                 | 263          |                                  |
| S 13 | $CH_3SCH_2OO + CH_3SCH_2OO \xrightarrow{O_2} 2HCHO + 2CH_3S$                | 2   | $1.0 \times 10^{-11}$                 |              |                                  |
| S 14 | $CH_3S + O_3 \longrightarrow CH_3SO + O_2$                                  | 2   | $1.15 \times 10^{-12}$                | 432          |                                  |
| S 15 | $CH_3S + NO_2 \longrightarrow CH_3SO + NO$                                  | 2   | $3.0 \times 10^{-11}$                 | 210          |                                  |
| S 16 | $CH_3SO + NO_2 \xrightarrow{O_2} 0.82CH_3SO_2 + 0.18SO_2 + 0.18CH_3OO + NO$ | 2   | $1.2 \times 10^{-11}$                 |              |                                  |
| S 17 | $CH_3SO + O_3 \xrightarrow{O_2} CH_3SO_2$                                   | 2   | $6.0 \times 10^{-13}$                 |              |                                  |

Table 2: Continued

| no    | reaction                                                                                                    | $n$ | $A [(cm^{-3})^{1-n} s^{-1}]$ | $-E_a/R [K]$ | reference                 |
|-------|-------------------------------------------------------------------------------------------------------------|-----|------------------------------|--------------|---------------------------|
| S 18  | $CH_3SO_2 \longrightarrow SO_2 + CH_3OO$                                                                    | 1   | $1.9 \times 10^{13}$         | -8661        |                           |
| S 19  | $CH_3SO_2 + NO_2 \longrightarrow CH_3SO_3 + NO$                                                             | 2   | $2.2 \times 10^{-12}$        |              |                           |
| S 20  | $CH_3SO_2 + O_3 \longrightarrow CH_3SO_3$                                                                   | 2   | $3 \times 10^{-13}$          |              |                           |
| S 21  | $CH_3SO_3 + HO_2 \longrightarrow CH_3SO_3H$                                                                 | 2   | $5 \times 10^{-11}$          |              |                           |
| S 22  | $CH_3SO_3 \xrightarrow{H_2O_2} CH_3OO + H_2SO_4$                                                            | 1   | $1.36 \times 10^{14}$        | -11071       |                           |
| S 23  | $CH_3SOCH_3 + OH \longrightarrow 0.95 CH_3SO_2H + 0.95 CH_3OO$<br>+0.05 DMSO <sub>2</sub>                   | 2   | $8.7 \times 10^{-11}$        |              |                           |
| S 24  | $CH_3SO_2H + OH \longrightarrow 0.95 CH_3SO_2 + 0.05 CH_3SO_3H$<br>+0.05 HO <sub>2</sub> + H <sub>2</sub> O | 2   | $9 \times 10^{-11}$          |              |                           |
| S 25  | $CH_3SO_2H + NO_3 \longrightarrow CH_3SO_2 + HNO_3$                                                         | 2   | $1.0 \times 10^{-13}$        |              |                           |
| Cl 1  | $Cl + O_3 \longrightarrow ClO + O_2$                                                                        | 2   | $2.8 \times 10^{-11}$        | -250         |                           |
| Cl 2  | $Cl + HO_2 \longrightarrow HCl + O_2$                                                                       | 2   | $1.8 \times 10^{-11}$        | 170          |                           |
| Cl 3  | $Cl + HO_2 \longrightarrow ClO + OH$                                                                        | 2   | $4.1 \times 10^{-11}$        | -450         |                           |
| Cl 4  | $Cl + H_2O_2 \longrightarrow HCl + HO_2$                                                                    | 2   | $1.1 \times 10^{-11}$        | -980         |                           |
| Cl 5  | $Cl + CH_3OO \longrightarrow 0.5 ClO + 0.5 HCHO + 0.5 HO_2$<br>+0.5 HCl + 0.5 CO + 0.5 H <sub>2</sub> O     | 2   | $1.6 \times 10^{-10}$        |              |                           |
| Cl 6  | $Cl + CH_4 \xrightarrow{O_2} HCl + CH_3OO$                                                                  | 2   | $9.6 \times 10^{-12}$        | -1360        |                           |
| Cl 7  | $Cl + C_2H_6 \xrightarrow{O_2} HCl + C_2H_5O_2$                                                             | 2   | $7.7 \times 10^{-11}$        | -90          |                           |
| Cl 8  | $Cl + C_2H_4 \xrightarrow{O_2} HCl + C_2H_5O_2$                                                             | 2   | $1 \times 10^{-10}$          |              |                           |
| Cl 9  | $Cl + HCHO \xrightarrow{O_2} HCl + HO_2 + CO$                                                               | 2   | $8.1 \times 10^{-11}$        | -30          |                           |
| Cl 10 | $Cl + ROOH \longrightarrow CH_3OO + HCl$                                                                    | 2   | $5.7 \times 10^{-11}$        |              |                           |
| Cl 11 | $Cl + OClO \longrightarrow ClO + ClO$                                                                       | 2   | $3.2 \times 10^{-11}$        | 170          |                           |
| Cl 12 | $Cl + ClONO_2 \longrightarrow Cl_2 + NO_3$                                                                  | 2   | $6.5 \times 10^{-12}$        | 135          |                           |
| Cl 13 | $ClO + OH \longrightarrow Cl + HO_2$                                                                        | 2   | $7.4 \times 10^{-12}$        | -270         |                           |
| Cl 14 | $ClO + OH \longrightarrow HCl + O_2$                                                                        | 2   | $6.0 \times 10^{-13}$        | -230         |                           |
| Cl 15 | $ClO + HO_2 \longrightarrow HOCl + O_2$                                                                     | 2   | $2.2 \times 10^{-12}$        | 340          |                           |
| Cl 16 | $ClO + CH_3OO \longrightarrow Cl + HCHO + HO_2$                                                             | 2   | $3.3 \times 10^{-12}$        | -115         |                           |
| Cl 17 | $ClO + NO \longrightarrow Cl + NO_2$                                                                        | 2   | $6.2 \times 10^{-12}$        | 295          |                           |
| Cl 18 | $ClO + NO_2 \xrightarrow{M} ClONO_2$                                                                        | 3   | <sup>2</sup>                 |              | M. Kanakidou, pers. comm. |

Table 2: Continued

| no    | reaction                                                                 | $n$ | $A [(cm^{-3})^{1-n} s^{-1}]$ | $-E_a/R [K]$ | reference                 |
|-------|--------------------------------------------------------------------------|-----|------------------------------|--------------|---------------------------|
| Cl 19 | $ClO + ClO \longrightarrow Cl_2O_2$                                      | 2   |                              |              | Atkinson et al. (2006)    |
| Cl 20 | $ClO + ClO \longrightarrow Cl_2 + O_2$                                   | 2   | $1.0 \times 10^{-12}$        | -1590        |                           |
| Cl 21 | $ClO + ClO \longrightarrow 2Cl + O_2$                                    | 2   | $3.0 \times 10^{-11}$        | -2450        |                           |
| Cl 22 | $ClO + ClO \longrightarrow Cl + OClO$                                    | 2   | $3.5 \times 10^{-13}$        | -1370        |                           |
| Cl 23 | $OCIO + OH \longrightarrow HOCl + O_2$                                   | 2   | $4.5 \times 10^{-13}$        | 800          |                           |
| Cl 24 | $OCIO + NO \longrightarrow ClO + NO_2$                                   | 2   | $1.1 \times 10^{-13}$        | 350          |                           |
| Cl 25 | $Cl_2O_2 \longrightarrow ClO + ClO$                                      | 1   |                              |              |                           |
| Cl 26 | $HOCl + OH \longrightarrow ClO + H_2O$                                   | 2   | $3.0 \times 10^{-12}$        | -500         |                           |
| Cl 27 | $HCl + OH \longrightarrow H_2O + Cl$                                     | 2   | $1.8 \times 10^{-12}$        | -240         |                           |
| Cl 28 | $ClNO_2 + OH \longrightarrow HOCl + NO_2$                                | 2   | $2.4 \times 10^{-12}$        | -1250        |                           |
| Cl 29 | $ClONO_2 + OH \longrightarrow 0.5 ClO + 0.5 HNO_3 + 0.5 HOCl + 0.5 NO_3$ | 2   | $1.2 \times 10^{-12}$        | -330         | M. Kanakidou, pers. comm. |
| Cl 30 | $ClONO_2 \longrightarrow ClO + NO_2$                                     | 1   |                              |              |                           |
| Cl 31 | $OCIO + hv \xrightarrow{O_2, O_3} O_3 + ClO$                             | 1   |                              |              |                           |
| Cl 32 | $Cl_2O_2 + hv \longrightarrow Cl + Cl + O_2$                             | 1   |                              |              |                           |
| Cl 33 | $Cl_2 + hv \longrightarrow 2Cl$                                          | 1   |                              |              |                           |
| Cl 34 | $HOCl + hv \longrightarrow Cl + OH$                                      | 1   |                              |              |                           |
| Cl 35 | $ClNO_2 + hv \longrightarrow Cl + NO_2$                                  | 1   |                              |              |                           |
| Cl 36 | $ClONO_2 + hv \longrightarrow Cl + NO_3$                                 | 1   |                              |              |                           |
| Br 1  | $Br + O_3 \longrightarrow BrO + O_2$                                     | 2   | $1.7 \times 10^{-11}$        | -800         | Sander et al. (2006)      |
| Br 2  | $Br + HO_2 \longrightarrow HBr + O_2$                                    | 2   | $7.7 \times 10^{-12}$        | -450         |                           |
| Br 3  | $Br + C_2H_4 \xrightarrow{O_2} HBr + C_2H_5O_2$                          | 2   | $5 \times 10^{-14}$          |              |                           |
| Br 4  | $Br + HCHO \xrightarrow{O_2} HBr + CO + HO_2$                            | 2   | $1.7 \times 10^{-11}$        | -800         |                           |
| Br 5  | $Br + ROOH \longrightarrow CH_3OO + HBr$                                 | 2   | $2.66 \times 10^{-12}$       | -1610        |                           |
| Br 6  | $Br + NO_2 \xrightarrow{M} BrNO_2$                                       | 3   |                              |              |                           |
| Br 7  | $Br + BrONO_2 \longrightarrow Br_2 + NO_3$                               | 2   | $4.9 \times 10^{-11}$        |              |                           |
| Br 8  | $BrO + OH \longrightarrow Br + HO_2$                                     | 2   | $1.8 \times 10^{-11}$        | 250          |                           |
| Br 9  | $BrO + HO_2 \longrightarrow HOBr + O_2$                                  | 2   | $4.5 \times 10^{-12}$        | 500          |                           |
| Br 10 | $BrO + CH_3OO \longrightarrow HOBr + HCHO$                               | 2   | $4.1 \times 10^{-12}$        |              |                           |
| Br 11 | $BrO + CH_3OO \longrightarrow Br + HCHO + HO_2$                          | 2   | $1.6 \times 10^{-12}$        |              |                           |

Table 2: Continued

| no    | reaction                                           | $n$ | $A [(cm^{-3})^{1-n} s^{-1}]$ | $-E_a/R [K]$ | reference                                           |
|-------|----------------------------------------------------|-----|------------------------------|--------------|-----------------------------------------------------|
| Br 12 | $BrO + HCHO \xrightarrow{O_2} HOBr + CO + HO_2$    | 2   | $1.5 \times 10^{-14}$        |              | Sander et al. (2006)                                |
| Br 13 | $BrO + NO \longrightarrow Br + NO_2$               | 2   | $8.7 \times 10^{-12}$        | 260          |                                                     |
| Br 14 | $BrO + NO_2 \xrightarrow{M} BrONO_2$               | 3   | <sup>2</sup>                 |              |                                                     |
| Br 15 | $BrO + BrO \longrightarrow 2Br + O_2$              | 2   | $2.4 \times 10^{-12}$        | 40           |                                                     |
| Br 16 | $BrO + BrO \longrightarrow Br_2 + O_2$             | 2   | $2.9 \times 10^{-14}$        | 860          |                                                     |
| Br 17 | $HBr + OH \longrightarrow Br + H_2O$               | 2   | $5.5 \times 10^{-12}$        | 205          | M. Kanakidou, pers. comm.                           |
| Br 18 | $BrONO_2 \longrightarrow BrO + NO_2$               | 1   | <sup>2</sup>                 |              |                                                     |
| Br 19 | $BrO + hv \xrightarrow{O_2} Br + O_3$              | 1   | <sup>1</sup>                 |              |                                                     |
| Br 20 | $Br_2 + hv \longrightarrow 2Br$                    | 1   | <sup>1</sup>                 |              |                                                     |
| Br 21 | $HOBr + hv \longrightarrow Br + OH$                | 1   | <sup>1</sup>                 |              |                                                     |
| Br 22 | $BrNO_2 + hv \longrightarrow Br + NO_2$            | 1   | <sup>1</sup>                 |              |                                                     |
| Br 23 | $BrONO_2 + hv \longrightarrow Br + NO_3$           | 1   | <sup>1</sup>                 |              |                                                     |
| I 1   | $I + O_3 \longrightarrow IO + O_2$                 | 2   | $1.9 \times 10^{-11}$        | -830         | M. Kanakidou, pers. comm.                           |
| I 2   | $I + HO_2 \longrightarrow HI + O_2$                | 2   | $1.5 \times 10^{-11}$        | -1090        |                                                     |
| I 3   | $I + NO_2 \xrightarrow{M} INO_2$                   | 3   | <sup>2</sup>                 |              |                                                     |
| I 4   | $I + NO_3 \longrightarrow IO + NO_2$               | 2   | $4.5 \times 10^{-10}$        |              |                                                     |
| I 5   | $I + I \longrightarrow I_2$                        | 2   | $2.99 \times 10^{-11}$       |              |                                                     |
| I 6   | $IO + HO_2 \longrightarrow HOI + O_2$              | 2   | $1.4 \times 10^{-11}$        | 540          | M. Kanakidou, pers. comm.<br>Atkinson et al. (2007) |
| I 7   | $IO + NO \longrightarrow I + NO_2$                 | 2   | $7.15 \times 10^{-12}$       | 300          |                                                     |
| I 8   | $IO + NO_2 \xrightarrow{M} IONO_2$                 | 3   | <sup>2</sup>                 |              |                                                     |
| I 9   | $IO + IO \longrightarrow 0.3IO + 0.3I + 0.7I_2O_2$ | 2   | $5.4 \times 10^{-11}$        | 180          |                                                     |
| I 10  | $OIO + OH \longrightarrow 0.5HOIO_2 + 0.5HOI$      | 2   | $2.0 \times 10^{-10}$        |              |                                                     |
| I 11  | $OIO + NO \longrightarrow NO_2 + IO$               | 2   | $5.1 \times 10^{-13}$        | 712          |                                                     |
| I 12  | $HI + OH \longrightarrow I + H_2O$                 | 2   | $1.6 \times 10^{-11}$        | 440          |                                                     |
| I 13  | $HI + NO_3 \longrightarrow I + HNO_3$              | 2   | $1.3 \times 10^{-12}$        | -1830        |                                                     |
| I 14  | $INO_2 \xrightarrow{M} I + NO_2$                   | 2   | <sup>2</sup>                 |              |                                                     |
| I 15  | $IONO_2 \xrightarrow{M} IO + NO_2$                 | 2   | $1.1 \times 10^{15}$         | -12060       |                                                     |
| I 16  | $I_2 + OH \longrightarrow I + HOI$                 | 2   | $2.1 \times 10^{-10}$        |              |                                                     |
| I 17  | $I_2 + NO_3 \longrightarrow I + IONO_2$            | 2   | $1.5 \times 10^{-12}$        |              |                                                     |

Table 2: Continued

| no   | reaction                                           | $n$ | $A [(cm^{-3})^{1-n} s^{-1}]$ | $-E_a/R [K]$ | reference                            |
|------|----------------------------------------------------|-----|------------------------------|--------------|--------------------------------------|
| I 18 | $CH_3I + OH \longrightarrow HCHO + I$              | 2   | $4.3 \times 10^{-12}$        | -1120        |                                      |
| I 19 | $C_3H_7I + OH \longrightarrow CH_3OO + I$          | 2   | $1.2 \times 10^{-12}$        |              |                                      |
| I 20 | $IO + hv \xrightarrow{O_2} I + O_3$                | 1   | 1                            |              |                                      |
| I 21 | $OIO + hv \longrightarrow I + O_2$                 | 1   | 1,2                          |              |                                      |
| I 22 | $HOI + hv \longrightarrow I + OH$                  | 1   | 1                            |              |                                      |
| I 23 | $INO_2 + hv \longrightarrow I + NO_2$              | 1   | 1                            |              |                                      |
| I 24 | $IONO_2 + hv \longrightarrow I + NO_3$             | 1   | 1                            |              |                                      |
| I 25 | $I_2 + hv \longrightarrow 2I$                      | 1   | 1                            |              | = BrONO <sub>2</sub>                 |
| I 26 | $CH_3I + hv \longrightarrow I + CH_3OO$            | 1   | 1                            |              |                                      |
| I 27 | $C_2H_5I + hv \longrightarrow I + ROOH$            | 1   | 1                            |              | = CH <sub>3</sub> I                  |
| I 28 | $C_3H_7I + hv \longrightarrow I + ROOH$            | 1   | 1                            |              |                                      |
| I 29 | $CH_2Cl + hv \longrightarrow I + Cl + 2HO_2 + CO$  | 1   | 1                            |              |                                      |
| I 30 | $CH_2BrI + hv \longrightarrow I + Br + 2HO_2 + CO$ | 1   | 1                            |              |                                      |
| I 31 | $CH_2I_2 + hv \longrightarrow I + IO + HCHO$       | 1   | 1                            |              |                                      |
| I 32 | $I_2O_2 \longrightarrow 2IO$                       | 1   | 0.04                         | (at 290K)    | Kaltsayannis and Plane (2008)        |
| I 33 | $I_2O_2 \longrightarrow OIO + I$                   | 1   | 10.0                         | (at 290K)    | Kaltsayannis and Plane (2008)        |
| I 32 | $I + IONO_2 \longrightarrow I_2 + NO_3$            | 2   | $5.5 \times 10^{-11}$        | (at 290K)    | Kaltsayannis and Plane (2008)        |
| I 33 | $IO + OIO \longrightarrow I_2O_3$                  | 2   | $1.5 \times 10^{-10}$        |              | Gómez Martín et al. (2005)           |
| I 34 | $OIO + OIO \longrightarrow I_2O_4$                 | 2   | $1.0 \times 10^{-10}$        |              | (rate after Saiz-Lopez et al., 2008) |
| I 35 | $I_2O_2 + O_3 \longrightarrow I_2O_3 + O_2$        | 2   | $1.0 \times 10^{-12}$        |              | Gómez Martín et al. (2005)           |
| I 36 | $I_2O_3 + O_3 \longrightarrow I_2O_4 + O_2$        | 2   | $1.0 \times 10^{-12}$        |              | (rate after Saiz-Lopez et al., 2008) |
| I 37 | $I_2O_4 + O_3 \longrightarrow I_2O_5 + O_2$        | 2   | $1.0 \times 10^{-12}$        |              | Saunders and Plane (2005)            |
| I 38 | $I_2O_4 \longrightarrow 2OIO$                      | 1   | 0.4                          | (at 290K)    | (rate after Saiz-Lopez et al., 2008) |
| I 39 | $I_2O_2 + hv \longrightarrow IO + IO$              | 1   | 0.06 (at midday)             |              | Saunders and Plane (2005)            |
| I 40 | $I_2O_3 + hv \longrightarrow IO + OIO$             | 1   | 0.06 (at midday)             |              | (rate after Saiz-Lopez et al., 2008) |
|      |                                                    |     |                              |              | Saunders and Plane (2005)            |
|      |                                                    |     |                              |              | (rate after Saiz-Lopez et al., 2008) |
|      |                                                    |     |                              |              | Saunders and Plane (2005)            |
|      |                                                    |     |                              |              | (rate after Saiz-Lopez et al., 2008) |
|      |                                                    |     |                              |              | Kaltsayannis and Plane (2008)        |
|      |                                                    |     |                              |              | estimated by Mahajan et al. (2009)   |
|      |                                                    |     |                              |              | estimated by Mahajan et al. (2009)   |

Table 2: Continued

| no    | reaction                                                               | $n$ | $A [(cm^{-3})^{1-n} s^{-1}]$ | $-E_a/R [K]$ | reference                          |
|-------|------------------------------------------------------------------------|-----|------------------------------|--------------|------------------------------------|
| I 41  | $I_2O_4 + h\nu \longrightarrow OIO + OIO$                              | 1   | 0.06 (at midday)             |              | estimated by Mahajan et al. (2009) |
| Hx 1  | $Cl + CH_3I \longrightarrow HCl + HCHO + I$                            | 2   | $2.9 \times 10^{-11}$        | -1000        |                                    |
| Hx 2  | $Cl + BrCl \longrightarrow Br + Cl_2$                                  | 2   | $1.5 \times 10^{-11}$        |              |                                    |
| Hx 3  | $Cl + Br_2 \longrightarrow BrCl + Br$                                  | 2   | $1.2 \times 10^{-10}$        |              |                                    |
| Hx 4  | $I_2 + Cl \longrightarrow I + ICl$                                     | 2   | $2.09 \times 10^{-10}$       |              |                                    |
| Hx 5  | $Br + OClO \longrightarrow BrO + ClO$                                  | 2   | $2.6 \times 10^{-11}$        | -1300        |                                    |
| Hx 6  | $Br + Cl_2 \longrightarrow BrCl + Cl$                                  | 2   | $1.1 \times 10^{-15}$        |              |                                    |
| Hx 7  | $Br + BrCl \longrightarrow Br_2 + Cl$                                  | 2   | $3.3 \times 10^{-15}$        |              |                                    |
| Hx 8  | $I_2 + Br \longrightarrow I + IBr$                                     | 2   | $1.2 \times 10^{-10}$        |              |                                    |
| Hx 9  | $I + BrO \longrightarrow IO + Br$                                      | 2   | $1.2 \times 10^{-11}$        |              |                                    |
| Hx 10 | $BrO + ClO \longrightarrow Br + OClO$                                  | 2   | $1.6 \times 10^{-12}$        | 430          |                                    |
| Hx 11 | $BrO + ClO \longrightarrow Br + Cl + O_2$                              | 2   | $2.9 \times 10^{-12}$        | 220          |                                    |
| Hx 12 | $BrO + ClO \longrightarrow BrCl + O_2$                                 | 2   | $5.8 \times 10^{-13}$        | 170          |                                    |
| Hx 13 | $IO + ClO \longrightarrow 0.8I + 0.55OClO + 0.45O_2 + 0.25Cl + 0.2ICl$ | 2   | $4.7 \times 10^{-12}$        | 280          |                                    |
| Hx 14 | $IO + BrO \longrightarrow Br + 0.8OIO + 0.2I + 0.2O_2$                 | 2   | $1.5 \times 10^{-11}$        | 510          |                                    |
| Hx 15 | $BrCl + h\nu \longrightarrow Br + Cl$                                  | 1   | 1                            |              |                                    |
| Hx 16 | $ICl + h\nu \longrightarrow I + Cl$                                    | 1   | 1                            |              |                                    |
| Hx 17 | $IBr + h\nu \longrightarrow I + Br$                                    | 1   | 1                            |              |                                    |

$n$  is the order of the reaction. <sup>1</sup> Photolysis rates are calculated from actinic fluxes measured at Roscoff during the RHaMBLe campaign. (Damian et al., 2002). <sup>2</sup> Special rate functions (pressure and/or humidity dependent). Notes: Self dissociation rates of  $N_2O_5$  and  $HNO_4$  are calculated by dividing their formation rates (reactions N9 and N6 respectively) by the equilibrium constants given in Sander et al. (2006).  $CH_3SCH_3$  reacts with OH and  $O_2$  to form  $CH_3SCH_2OO$ , however the second step of this process (that involving  $O_2$ ) is extremely rapid, so it is assumed that the process is controlled only by the first reaction rate. The temperature dependence is  $k = A \times \exp\left(\frac{-E_a}{R} \left(\frac{1}{T} - \frac{1}{T_0}\right)\right)$ , where  $T_0 = 298 \text{ K}$ .

Table 3: Aqueous phase reactions

| no   | reaction                                      | $n$ | $k_0 [(M^{1-n}) s^{-1}]$ | $-E_a/R [K]$ | reference |
|------|-----------------------------------------------|-----|--------------------------|--------------|-----------|
| O 1  | $O_3 + OH \rightarrow HO_2$                   | 2   | $1.1 \times 10^8$        |              |           |
| O 2  | $O_3 + O_2^- \rightarrow OH + OH^-$           | 2   | $1.5 \times 10^9$        |              |           |
| O 3  | $OH + OH \rightarrow H_2O_2$                  | 2   | $5.5 \times 10^9$        |              |           |
| O 4  | $OH + HO_2 \rightarrow H_2O$                  | 2   | $7.1 \times 10^9$        |              |           |
| O 5  | $OH + O_2^- \rightarrow OH^-$                 | 2   | $1.0 \times 10^{10}$     |              |           |
| O 6  | $OH + H_2O_2 \rightarrow HO_2$                | 2   | $2.7 \times 10^7$        | -1684        |           |
| O 7  | $HO_2 + HO_2 \rightarrow H_2O_2$              | 2   | $9.7 \times 10^5$        | -2500        |           |
| O 8  | $HO_2 + O_2^- \xrightarrow{H^+} H_2O_2$       | 2   | $1.0 \times 10^8$        | -900         |           |
| N 1  | $HONO + OH \rightarrow NO_2$                  | 2   | $1.0 \times 10^{10}$     |              | = N7      |
| N 2  | $HONO + H_2O_2 \xrightarrow{H^+} HNO_3 + H^+$ | 3   | $4.6 \times 10^3$        | -6800        |           |
| N 3  | $NO_3 + OH^- \rightarrow NO_3^- + OH$         | 2   | $8.2 \times 10^7$        | -2700        |           |
| N 4  | $NO_2 + NO_2 \rightarrow HNO_3 + HONO$        | 2   | $1.0 \times 10^8$        |              |           |
| N 5  | $NO_2 + HO_2 \rightarrow HNO_4$               | 2   | $1.8 \times 10^9$        |              |           |
| N 6  | $NO_2^- + O_3 \rightarrow NO_3^- + O_2$       | 2   | $5.0 \times 10^5$        | -6950        |           |
| N 7  | $NO_2^- + OH \rightarrow NO_2 + OH^-$         | 2   | $1.0 \times 10^{10}$     |              |           |
| N 8  | $NO_4^- \rightarrow NO_2^- + O_2$             | 1   | $8.0 \times 10^{-1}$     |              |           |
| C 1  | $HCHO + OH \rightarrow HCOOH + HO_2$          | 2   | $7.7 \times 10^8$        | -1020        |           |
| C 2  | $HCOOH + OH \rightarrow HO_2 + CO_2$          | 2   | $1.1 \times 10^8$        | -991         |           |
| C 3  | $HCOO^- + OH \rightarrow OH^- + HO_2 + CO_2$  | 2   | $3.1 \times 10^9$        | -1240        |           |
| C 4  | $CH_3OO + HO_2 \rightarrow CH_3OOH$           | 2   | $4.3 \times 10^5$        |              |           |
| C 5  | $CH_3OO + O_2^- \rightarrow CH_3OOH + OH^-$   | 2   | $5.0 \times 10^7$        |              |           |
| C 6  | $CH_3OH + OH \rightarrow HCHO + HO_2$         | 2   | $9.7 \times 10^8$        |              |           |
| C 7  | $CH_3OOH + OH \rightarrow CH_3OO$             | 2   | $2.7 \times 10^7$        | -1715        |           |
| C 8  | $CH_3OOH + OH \rightarrow HCHO + OH$          | 2   | $1.1 \times 10^7$        | -1715        |           |
| C 9  | $CO_3^- + O_2^- \rightarrow HCO_3^- + OH^-$   | 2   | $6.5 \times 10^8$        |              |           |
| C 10 | $CO_3^- + H_2O_2 \rightarrow HCO_3^- + HO_2$  | 2   | $4.3 \times 10^5$        |              |           |
| C 11 | $CO_3^- + HCOO^- \rightarrow 2HCO_3^- + HO_2$ | 2   | $1.5 \times 10^5$        |              |           |
| C 12 | $HCO_3^- + OH \rightarrow CO_3^-$             | 2   | $8.5 \times 10^6$        |              |           |
| C 13 | $DOM + OH \rightarrow HO_2$                   | 2   | $5.0 \times 10^9$        |              |           |

Table 3: Continued

| no   | reaction                                                                | $n$ | $k_0 [(M^{1-n}) s^{-1}]$                            | $-E_a/R [K]$ | reference |
|------|-------------------------------------------------------------------------|-----|-----------------------------------------------------|--------------|-----------|
| S 1  | $SO_3^- + O_2 \longrightarrow SO_5^-$                                   | 2   | $1.5 \times 10^9$                                   |              |           |
| S 2  | $HSO_3^- + O_3 \longrightarrow SO_4^{2-} + H^+ + O_2$                   | 2   | $3.7 \times 10^5$                                   | -5500        |           |
| S 3  | $SO_3^{2-} + O_3 \longrightarrow SO_4^{2-} + O_2$                       | 2   | $1.5 \times 10^9$                                   | -5300        |           |
| S 4  | $HSO_3^- + OH \longrightarrow SO_3^-$                                   | 2   | $4.5 \times 10^9$                                   |              |           |
| S 5  | $SO_3^{2-} + OH \longrightarrow SO_3^- + OH^-$                          | 2   | $5.5 \times 10^9$                                   |              |           |
| S 6  | $HSO_3^- + HO_2 \longrightarrow SO_4^{2-} + OH + H^+$                   | 2   | $3.0 \times 10^3$                                   |              |           |
| S 7  | $HSO_3^- + O_2^- \longrightarrow SO_4^{2-} + OH$                        | 2   | $3.0 \times 10^3$                                   |              |           |
| S 8  | $HSO_3^- + H_2O_2 \longrightarrow SO_4^{2-} + H^+$                      | 2   | $5.2 \times 10^6 \times \frac{[H^+]}{[H^+] + 0.1M}$ | -3650        |           |
| S 9  | $HSO_3^- + NO_2 \xrightarrow{NO_2} HSO_4^- + HONO + HONO$               | 2   | $2.0 \times 10^7$                                   |              |           |
| S 10 | $SO_3^{2-} + NO_2 \xrightarrow{NO_2} SO_4^{2-} + HONO + HONO$           | 2   | $2.0 \times 10^7$                                   |              |           |
| S 11 | $HSO_3^- + NO_3 \longrightarrow SO_3^- + NO_3^- + H^+$                  | 2   | $1.4 \times 10^9$                                   | -2000        |           |
| S 12 | $HSO_3^- + HNO_4 \longrightarrow HSO_4^- + NO_3^- + H^+$                | 2   | $3.1 \times 10^5$                                   |              |           |
| S 13 | $HSO_3^- + CH_3OOH \xrightarrow{H^+} SO_4^{2-} + H^+ + CH_3OH$          | 3   | $1.6 \times 10^7$                                   | -3800        |           |
| S 14 | $SO_3^{2-} + CH_3OOH \xrightarrow{H^+} SO_4^{2-} + CH_3OH$              | 3   | $1.6 \times 10^7$                                   | -3800        |           |
| S 15 | $HSO_3^- + HCHO \longrightarrow CH_2OH SO_3^-$                          | 2   | $4.3 \times 10^{-1}$                                |              |           |
| S 16 | $SO_3^{2-} + HCHO \xrightarrow{H^+} CH_2OH SO_3^-$                      | 2   | $1.4 \times 10^4$                                   |              |           |
| S 17 | $CH_2OH SO_3^- + OH^- \longrightarrow SO_3^{2-} + HCHO$                 | 2   | $3.6 \times 10^3$                                   |              |           |
| S 18 | $HSO_3^- + HSO_5^- \xrightarrow{H^+} SO_4^{2-} + SO_4^{2-} + H^+ + H^+$ | 2   | $7.1 \times 10^6$                                   |              |           |
| S 19 | $SO_4^- + OH \longrightarrow HSO_5^-$                                   | 2   | $1.0 \times 10^9$                                   |              |           |
| S 20 | $SO_4^- + HO_2 \longrightarrow SO_4^{2-} + H^+$                         | 2   | $3.5 \times 10^9$                                   |              |           |
| S 21 | $SO_4^- + O_2^- \longrightarrow SO_4^{2-}$                              | 2   | $3.5 \times 10^9$                                   |              |           |
| S 22 | $SO_4^- + H_2O \longrightarrow SO_4^{2-} + H^+ + OH$                    | 2   | $1.1 \times 10^1$                                   |              |           |
| S 23 | $SO_4^- + H_2O_2 \longrightarrow SO_4^{2-} + H^+ + HO_2$                | 2   | $1.2 \times 10^7$                                   | -1110        |           |
| S 24 | $SO_4^- + NO_3^- \longrightarrow SO_4^{2-} + NO_3$                      | 2   | $5.0 \times 10^4$                                   |              |           |
| S 25 | $SO_4^- + HSO_3^- \longrightarrow SO_3^- + SO_4^{2-} + H^+$             | 2   | $8.0 \times 10^8$                                   |              |           |
| S 26 | $SO_4^- + SO_3^{2-} \longrightarrow SO_3^- + SO_4^{2-}$                 | 2   | $4.6 \times 10^8$                                   |              |           |
| S 27 | $SO_4^{2-} + NO_3 \longrightarrow NO_3^- + SO_4^-$                      | 2   | $1.0 \times 10^5$                                   |              |           |
| S 28 | $SO_5^- + HSO_3^- \longrightarrow SO_4^- + SO_4^{2-} + H^+$             | 2   | $7.5 \times 10^4$                                   |              |           |

= S20

Table 3: Continued

| no    | reaction                                                                               | $n$ | $k_0 [(M^{1-n}) s^{-1}]$ | $-E_a/R [K]$ | reference |
|-------|----------------------------------------------------------------------------------------|-----|--------------------------|--------------|-----------|
| S 29  | $SO_5^- + SO_3^{2-} \longrightarrow SO_4^- + SO_4^{2-}$                                | 2   | $9.4 \times 10^6$        |              |           |
| S 30  | $SO_5^- + HSO_3^- \longrightarrow SO_3^- + HSO_5^-$                                    | 2   | $2.5 \times 10^4$        |              |           |
| S 31  | $SO_5^- + SO_3^{2-} \xrightarrow{H^+} SO_3^- + HSO_5^-$                                | 2   | $3.6 \times 10^6$        |              |           |
| S 32  | $SO_5^- + O_2 \xrightarrow{H^+} HSO_5^- + O_2$                                         | 2   | $2.3 \times 10^8$        |              |           |
| S 33  | $SO_5^- + SO_5^- \longrightarrow 2 SO_4^-$                                             | 2   | $1.0 \times 10^8$        |              |           |
| S 34  | $DMS + O_3 \longrightarrow O_2 + DMSO$                                                 | 2   | $8.6 \times 10^8$        | -2600        |           |
| S 35  | $DMS + OH \longrightarrow 0.5 CH_3SO_3^- + 0.5 CH_3OO$<br>$+ 0.5 HSO_4^- + HCHO + H^+$ | 2   | $1.9 \times 10^{10}$     |              |           |
| S 36  | $DMSO + OH \longrightarrow CH_3SO_2^- + CH_3OO + H^+$                                  | 2   | $4.5 \times 10^9$        |              |           |
| S 37  | $CH_3SO_2^- + OH \longrightarrow CH_3SO_3^- + H_2O + O_2$                              | 2   | $1.2 \times 10^{10}$     |              |           |
| S 38  | $CH_3SO_3^- + OH \longrightarrow SO_4^{2-} + H^+ + CH_3OO$                             | 2   | $1.2 \times 10^7$        |              |           |
| Cl 1  | $Cl^- + H_2O_2 \longrightarrow HO_2 + Cl^- + H^+$                                      | 2   | $2.0 \times 10^9$        |              |           |
| Cl 2  | $Cl^- + H_2O \longrightarrow H^+ + ClOH^-$                                             | 2   | $1.8 \times 10^5$        |              |           |
| Cl 3  | $Cl^- + NO_3^- \longrightarrow NO_3 + Cl^-$                                            | 2   | $1.0 \times 10^8$        |              |           |
| Cl 4  | $Cl^- + DOM \longrightarrow Cl^- + HO_2$                                               | 2   | $5.0 \times 10^9$        |              |           |
| Cl 5  | $Cl^- + SO_4^{2-} \longrightarrow SO_4^- + Cl^-$                                       | 2   | $2.1 \times 10^8$        |              |           |
| Cl 6  | $Cl^- + Cl \longrightarrow Cl_2$                                                       | 2   | $8.8 \times 10^7$        |              |           |
| Cl 7  | $Cl^- + OH \longrightarrow ClOH^-$                                                     | 2   | $4.2 \times 10^9$        |              |           |
| Cl 8  | $Cl^- + O_3 \longrightarrow ClO^- + O_2$                                               | 2   | $3.0 \times 10^{-3}$     |              |           |
| Cl 9  | $Cl^- + NO_3 \longrightarrow NO_3^- + Cl$                                              | 2   | $9.3 \times 10^6$        | -4330        |           |
| Cl 10 | $Cl^- + SO_4^- \longrightarrow SO_4^{2-} + Cl$                                         | 2   | $2.5 \times 10^8$        |              |           |
| Cl 11 | $Cl^- + HSO_5^- \longrightarrow HOCl + SO_4^{2-}$                                      | 2   | $1.8 \times 10^{-3}$     | -7352        |           |
| Cl 12 | $Cl^- + HOCl + H^+ \longrightarrow Cl_2$                                               | 3   | $2.2 \times 10^4$        | -3508        |           |
| Cl 13 | $Cl_2 \longrightarrow Cl^- + HOCl + H^+$                                               | 1   | $2.2 \times 10^1$        | -8012        |           |
| Cl 14 | $Cl_2^- + OH \longrightarrow HOCl + Cl^-$                                              | 2   | $1.0 \times 10^9$        |              |           |
| Cl 15 | $Cl_2^- + OH^- \longrightarrow Cl^- + Cl^- + OH$                                       | 2   | $4.0 \times 10^6$        |              |           |
| Cl 16 | $Cl_2^- + HO_2 \longrightarrow Cl^- + Cl^- + H^+ + O_2$                                | 2   | $3.1 \times 10^9$        |              |           |
| Cl 17 | $Cl_2^- + O_2^- \longrightarrow Cl^- + Cl^- + O_2$                                     | 2   | $6.0 \times 10^9$        |              |           |
| Cl 18 | $Cl_2^- + H_2O_2 \longrightarrow Cl^- + Cl^- + H^+ + HO_2$                             | 2   | $7.0 \times 10^5$        | -3340        |           |
| Cl 19 | $Cl_2^- + NO_2^- \longrightarrow Cl^- + Cl^- + NO_2$                                   | 2   | $6.0 \times 10^7$        |              |           |

Table 3: Continued

| no    | reaction                                                                                         | $n$ | $k_0 [(M^{1-n}) s^{-1}]$ | $-E_a/R [K]$ | reference |
|-------|--------------------------------------------------------------------------------------------------|-----|--------------------------|--------------|-----------|
| Cl 20 | $Cl_2^- + CH_3OOH \longrightarrow Cl^- + Cl^- + H^+ + CH_3OO$                                    | 2   | $7.0 \times 10^5$        | -3340        |           |
| Cl 21 | $Cl_2^- + DOM \longrightarrow Cl^- + Cl^- + HO_2$                                                | 2   | $1.0 \times 10^6$        |              |           |
| Cl 22 | $Cl_2^- + HSO_3^- \longrightarrow SO_3^- + Cl^- + Cl^- + H^+$                                    | 2   | $4.7 \times 10^8$        | -1082        |           |
| Cl 23 | $Cl_2^- + SO_3^{2-} \longrightarrow SO_3^- + Cl^- + Cl^-$                                        | 2   | $6.2 \times 10^7$        |              |           |
| Cl 24 | $Cl_2^- + Cl_2^- \longrightarrow Cl_2 + 2 Cl^-$                                                  | 2   | $6.2 \times 10^9$        |              |           |
| Cl 25 | $Cl_2^- + Cl^- \longrightarrow Cl^- + Cl_2$                                                      | 2   | $2.7 \times 10^9$        |              |           |
| Cl 26 | $Cl_2^- + DMS \longrightarrow 0.5 CH_3SO_3^- + 0.5 CH_3OO + 0.5 HSO_4^- + HCHO + 2 Cl^- + 2 H^+$ | 2   | $3.0 \times 10^9$        |              |           |
| Cl 27 | $ClOH^- \longrightarrow Cl^- + OH$                                                               | 1   | $6.0 \times 10^9$        |              |           |
| Cl 28 | $ClOH^- + H^+ \longrightarrow Cl$                                                                | 2   | $4.0 \times 10^{10}$     |              |           |
| Cl 29 | $HOCl + HO_2 \longrightarrow Cl + O_2$                                                           | 2   | $7.5 \times 10^6$        |              | = Cl30    |
| Cl 30 | $HOCl + O_2^- \longrightarrow Cl + OH^- + O_2$                                                   | 2   | $7.5 \times 10^6$        |              |           |
| Cl 31 | $HOCl + SO_3^{2-} \longrightarrow Cl^- + HSO_4^-$                                                | 2   | $7.6 \times 10^8$        |              |           |
| Cl 32 | $HOCl + HSO_3^- \longrightarrow Cl^- + HSO_4^- + H^+$                                            | 2   | $7.6 \times 10^8$        |              | = Cl31    |
| Cl 33 | $Cl_2 + HO_2 \longrightarrow Cl_2^- + H^+ + O_2$                                                 | 2   | $1.0 \times 10^9$        |              |           |
| Cl 34 | $Cl_2 + O_2^- \longrightarrow Cl_2^- + O_2$                                                      | 2   | $1.0 \times 10^9$        |              | = Cl33    |
| Br 1  | $Br + OH^- \longrightarrow BrOH^-$                                                               | 2   | $1.3 \times 10^{10}$     |              |           |
| Br 2  | $Br + DOM \longrightarrow Br^- + HO_2$                                                           | 2   | $2.0 \times 10^8$        |              |           |
| Br 3  | $Br^- + OH \longrightarrow BrOH^-$                                                               | 2   | $1.1 \times 10^{10}$     |              |           |
| Br 4  | $Br^- + O_3 \longrightarrow BrO^-$                                                               | 2   | $2.1 \times 10^2$        | -4450        |           |
| Br 5  | $Br^- + NO_3 \longrightarrow Br + NO_3^-$                                                        | 2   | $3.8 \times 10^9$        |              |           |
| Br 6  | $Br^- + SO_4^- \longrightarrow Br + SO_4^{2-}$                                                   | 2   | $2.1 \times 10^9$        |              |           |
| Br 7  | $Br^- + HSO_5^- \longrightarrow HOBr + SO_4^{2-}$                                                | 2   | 1.0                      | -5338        |           |
| Br 8  | $Br^- + HOBr + H^+ \longrightarrow Br_2$                                                         | 2   | $1.6 \times 10^{10}$     |              |           |
| Br 9  | $Br_2 \longrightarrow Br^- + HOBr + H^+$                                                         | 3   | $9.7 \times 10^1$        | 7457         |           |
| Br 10 | $Br_2^- + O_2^- \longrightarrow Br^- + Br^-$                                                     | 2   | $1.7 \times 10^8$        |              |           |
| Br 11 | $Br_2^- + HO_2 \longrightarrow Br_2 + H_2O_2 - H^+$                                              | 2   | $4.4 \times 10^9$        |              |           |
| Br 12 | $Br_2^- + H_2O_2 \longrightarrow Br^- + Br^- + H^+ + HO_2$                                       | 2   | $5.0 \times 10^2$        |              |           |
| Br 13 | $Br_2^- + Br_2^- \longrightarrow Br^- + Br^- + Br_2$                                             | 1   | $1.9 \times 10^9$        |              |           |
| Br 14 | $Br_2^- + CH_3OOH \longrightarrow Br^- + Br^- + H^+ + CH_3OO$                                    | 2   | $1.0 \times 10^5$        |              |           |

Table 3: Continued

| no    | reaction                                                                                         | $n$ | $k_0 [(M^{1-n}) s^{-1}]$ | $-E_a/R [K]$ | reference |
|-------|--------------------------------------------------------------------------------------------------|-----|--------------------------|--------------|-----------|
| Br 15 | $Br_2^- + DOM \longrightarrow Br^- + Br^- + HO_2$                                                | 2   | $1.0 \times 10^5$        | -1720        | = Br28    |
| Br 16 | $Br_2^- + NO_2^- \longrightarrow Br^- + Br^- + NO_2$                                             | 2   | $1.7 \times 10^7$        | -782         |           |
| Br 17 | $Br_2^- + HSO_3^- \longrightarrow Br^- + Br^- + H^+ + SO_3^-$                                    | 2   | $6.3 \times 10^7$        | -650         |           |
| Br 18 | $Br_2^- + SO_3^{2-} \longrightarrow Br^- + Br^- + SO_3^-$                                        | 2   | $2.2 \times 10^8$        |              |           |
| Br 19 | $Br_2^- + DMS \longrightarrow 0.5 CH_3SO_3^- + 0.5 CH_3OO + 0.5 HSO_4^- + HCHO + 2 Br^- + 2 H^+$ | 2   | $3.2 \times 10^9$        |              |           |
| Br 20 | $BrOH^- \longrightarrow Br^- + OH$                                                               | 1   | $3.3 \times 10^7$        |              |           |
| Br 21 | $BrOH^- \longrightarrow Br + OH^-$                                                               | 1   | $4.2 \times 10^6$        |              |           |
| Br 22 | $BrOH^- + H^+ \longrightarrow Br$                                                                | 2   | $4.4 \times 10^{10}$     |              |           |
| Br 23 | $BrOH^- + Br^- \longrightarrow Br_2^- + OH^-$                                                    | 2   | $1.9 \times 10^8$        |              |           |
| Br 24 | $BrO^- + SO_3^{2-} \longrightarrow Br^- + SO_4^{2-}$                                             | 2   | $1.0 \times 10^8$        |              |           |
| Br 25 | $HOBr + HO_2 \longrightarrow Br + O_2$                                                           | 2   | $1.0 \times 10^9$        |              |           |
| Br 26 | $HOBr + O_2^- \longrightarrow Br + OH^- + O_2$                                                   | 2   | $3.5 \times 10^9$        |              |           |
| Br 27 | $HOBr + H_2O_2 \longrightarrow Br^- + H^+ + O_2$                                                 | 2   | $1.2 \times 10^6$        |              |           |
| Br 28 | $HOBr + SO_3^{2-} \longrightarrow Br^- + HSO_4^-$                                                | 2   | $5.0 \times 10^9$        |              |           |
| Br 29 | $HOBr + HSO_3^- \longrightarrow Br^- + HSO_4^- + H^+$                                            | 2   | $5.0 \times 10^9$        |              |           |
| Br 30 | $Br_2 + HO_2 \longrightarrow Br_2^- + H^+ + O_2$                                                 | 2   | $1.1 \times 10^8$        |              |           |
| Br 31 | $Br_2 + O_2^- \longrightarrow Br_2^- + O_2$                                                      | 2   | $5.6 \times 10^9$        |              |           |
| I 1   | $HOI + I^- + H^+ \longrightarrow I_2$                                                            | 3   | $4.4 \times 10^{12}$     |              |           |
| I 2   | $HOI + Cl^- + H^+ \longrightarrow ICl$                                                           | 3   | $2.9 \times 10^{10}$     |              |           |
| I 3   | $ICl \longrightarrow HOI + Cl^- + H^+$                                                           | 1   | $2.4 \times 10^6$        |              |           |
| I 4   | $HOI + Br^- + H^+ \longrightarrow IBr$                                                           | 3   | $3.3 \times 10^{12}$     |              |           |
| I 5   | $IBr \longrightarrow HOI + H^+ + Br^-$                                                           | 1   | $8.0 \times 10^5$        |              |           |
| I 6   | $HOCl + I^- + H^+ \longrightarrow ICl$                                                           | 3   | $3.5 \times 10^{11}$     |              |           |
| I 7   | $HOBr + I^- \longrightarrow IBr + OH^-$                                                          | 2   | $5.0 \times 10^9$        |              |           |
| I 8   | $IO_2^- + H_2O_2 \longrightarrow IO_3^-$                                                         | 2   | $6.0 \times 10^1$        |              |           |
| I 9   | $IO + IO \longrightarrow HOI + IO_2^- + H^+$                                                     | 2   | $1.5 \times 10^9$        |              |           |
| I 10  | $I^- + O_3 \xrightarrow{H^+} HOI$                                                                | 2   | $4.2 \times 10^9$        | -9311        |           |
| I 11  | $HOI + Cl_2 \longrightarrow IO_2^- + 2 Cl^- + 3 H^+$                                             | 2   | $1.0 \times 10^6$        |              |           |
| I 12  | $HOI + HOC l \longrightarrow IO_2^- + Cl^- + 2 H^+$                                              | 2   | $5.0 \times 10^5$        |              |           |

Table 3: Continued

| no   | reaction                                                                                 | $n$ | $k_0 [(M^{1-n}) s^{-1}]$ | $-E_a/R [K]$ | reference                    |
|------|------------------------------------------------------------------------------------------|-----|--------------------------|--------------|------------------------------|
| I 13 | $\text{HOI} + \text{HOBr} \longrightarrow \text{IO}_2^- + \text{Br}^- + 2\text{H}^+$     | 2   | $1.0 \times 10^6$        |              |                              |
| I 14 | $\text{IO}_2^- + \text{HOCl} \longrightarrow \text{IO}_3^- + \text{Cl}^- + \text{H}^+$   | 2   | $1.5 \times 10^3$        |              |                              |
| I 15 | $\text{IO}_2^- + \text{HOBr} \longrightarrow \text{IO}_3^- + \text{Br}^- + \text{H}^+$   | 2   | $1.0 \times 10^6$        |              |                              |
| I 16 | $\text{IO}_2^- + \text{HOI} \longrightarrow \text{IO}_3^- + \text{I}^- + \text{H}^+$     | 2   | $6.0 \times 10^2$        |              |                              |
| I 17 | $\text{I}_2 + \text{HSO}_3^- \longrightarrow 2\text{I}^- + \text{HSO}_4^- + 2\text{H}^+$ | 2   | $1.0 \times 10^6$        |              |                              |
| Hx 1 | $\text{Br}^- + \text{HOCl} + \text{H}^+ \longrightarrow \text{BrCl}$                     | 3   | $1.3 \times 10^6$        |              |                              |
| Hx 2 | $\text{Cl}^- + \text{HOBr} + \text{H}^+ \longrightarrow \text{BrCl}$                     | 3   | $2.3 \times 10^{10}$     |              |                              |
| Hx 3 | $\text{BrCl} \longrightarrow \text{Cl}^- + \text{HOBr} + \text{H}^+$                     | 1   | $3.0 \times 10^6$        |              |                              |
| Hx 4 | $\text{Br}^- + \text{ClO}^- + \text{H}^+ \longrightarrow \text{BrCl} + \text{OH}^-$      | 3   | $3.7 \times 10^{10}$     |              |                              |
| Hx 5 | $\text{Cl}_2 + \text{Br}^- \longrightarrow \text{BrCl}_2^-$                              | 2   | $7.7 \times 10^9$        |              |                              |
| Hx 6 | $\text{BrCl}_2^- \longrightarrow \text{Cl}_2 + \text{Br}^-$                              | 1   | $1.83 \times 10^3$       |              |                              |
| hv 1 | $\text{O}_3 + h\nu \longrightarrow \text{OH} + \text{OH} + \text{O}_2$                   | 1   | 1                        |              | assumed $2 \times$ gas phase |
| hv 2 | $\text{H}_2\text{O}_2 + h\nu \longrightarrow \text{OH} + \text{OH}$                      | 1   | 1                        |              | assumed $2 \times$ gas phase |
| hv 3 | $\text{NO}_3^- + h\nu \xrightarrow{\text{H}^+} \text{NO}_2 + \text{OH}$                  | 1   | 1                        |              |                              |
| hv 4 | $\text{NO}_2^- + h\nu \xrightarrow{\text{H}^+} \text{NO} + \text{OH}$                    | 1   | 1                        |              | assumed $2 \times$ gas phase |
| hv 5 | $\text{HOCl} + h\nu \longrightarrow \text{OH} + \text{Cl}$                               | 1   | 1                        |              | assumed $2 \times$ gas phase |
| hv 6 | $\text{Cl}_2 + h\nu \longrightarrow \text{Cl} + \text{Cl}$                               | 1   | 1                        |              | assumed $2 \times$ gas phase |
| hv 7 | $\text{HOBr} + h\nu \longrightarrow \text{OH} + \text{Br}$                               | 1   | 1                        |              | assumed $2 \times$ gas phase |
| hv 8 | $\text{Br}_2 + h\nu \longrightarrow \text{Br} + \text{Br}$                               | 1   | 1                        |              | assumed $2 \times$ gas phase |
| hv 9 | $\text{BrCl} + h\nu \longrightarrow \text{Cl} + \text{Br}$                               | 1   | 1                        |              | assumed $2 \times$ gas phase |

$n$  is the order of the reaction. The temperature dependence is  $k = k_0 \times \exp\left(\frac{-E_a}{R} \left(\frac{1}{T} - \frac{1}{T_0}\right)\right)$ , where  $T_0 = 298 \text{ K}$ .

Table 4: Heterogeneous reactions

| no   | reaction                                                                                                  | $\bar{k}$                                                                        | reference |
|------|-----------------------------------------------------------------------------------------------------------|----------------------------------------------------------------------------------|-----------|
| H 1  | $\text{N}_2\text{O}_5 \xrightarrow{\text{H}_2\text{O}} \text{HNO}_{3\text{aq}} + \text{HNO}_{3\text{aq}}$ | $\bar{k}_t(\text{N}_2\text{O}_5)w_{l,i}[\text{H}_2\text{O}]/\text{Het}_T$        |           |
| H 2  | $\text{N}_2\text{O}_5 \xrightarrow{\text{Cl}^-} \text{ClNO}_2 + \text{NO}_3^-$                            | $\bar{k}_t(\text{N}_2\text{O}_5)w_{l,i}f(\text{Cl}^-)[\text{Cl}^-]/\text{Het}_T$ |           |
| H 3  | $\text{N}_2\text{O}_5 \xrightarrow{\text{Br}^-} \text{BrNO}_2 + \text{NO}_3^-$                            | $\bar{k}_t(\text{N}_2\text{O}_5)w_{l,i}f(\text{Br}^-)[\text{Br}^-]/\text{Het}_T$ |           |
| H 4  | $\text{ClONO}_2 \xrightarrow{\text{H}_2\text{O}} \text{HOCl}_{\text{aq}} + \text{HNO}_{3\text{aq}}$       | $\bar{k}_t(\text{ClONO}_2)w_{l,i}[\text{H}_2\text{O}]/\text{Het}_T$              | see note  |
| H 5  | $\text{ClONO}_2 \xrightarrow{\text{Cl}^-} \text{Cl}_{2\text{aq}} + \text{NO}_3^-$                         | $\bar{k}_t(\text{ClONO}_2)w_{l,i}[\text{Cl}^-]/\text{Het}_T$                     | see note  |
| H 6  | $\text{ClONO}_2 \xrightarrow{\text{Br}^-} \text{BrCl}_{\text{aq}} + \text{NO}_3^-$                        | $\bar{k}_t(\text{ClONO}_2)w_{l,i}[\text{Br}^-]/\text{Het}_T$                     | see note  |
| H 7  | $\text{BrONO}_2 \xrightarrow{\text{H}_2\text{O}} \text{HOBr}_{\text{aq}} + \text{HNO}_{3\text{aq}}$       | $\bar{k}_t(\text{BrONO}_2)w_{l,i}[\text{H}_2\text{O}]/\text{Het}_T$              | see note  |
| H 8  | $\text{BrONO}_2 \xrightarrow{\text{Cl}^-} \text{BrCl}_{\text{aq}} + \text{NO}_3^-$                        | $\bar{k}_t(\text{BrONO}_2)w_{l,i}[\text{Cl}^-]/\text{Het}_T$                     | see note  |
| H 9  | $\text{BrONO}_2 \xrightarrow{\text{Br}^-} \text{Br}_{2\text{aq}} + \text{NO}_3^-$                         | $\bar{k}_t(\text{BrONO}_2)w_{l,i}[\text{Br}^-]/\text{Het}_T$                     | see note  |
| H 10 | $\text{IONO}_2 \xrightarrow{\text{H}_2\text{O}} \text{HOI}_{\text{aq}} + \text{HNO}_{3\text{aq}}$         | $\bar{k}_t(\text{IONO}_2)w_{l,i}$                                                |           |
| H 11 | $\text{HI} \xrightarrow{\text{H}_2\text{O}} \text{H}^+ + \text{I}^-$                                      | $\bar{k}_t(\text{HI})w_{l,i}$                                                    |           |
| H 12 | $\text{INO}_2 \xrightarrow{\text{H}_2\text{O}} \text{HOI}_{\text{aq}} + \text{HONO}_{\text{aq}}$          | $\bar{k}_t(\text{INO}_2)w_{l,i}$                                                 |           |
| H 13 | $\text{OIO} \xrightarrow{\text{H}_2\text{O}} \text{HOI}_{\text{aq}} + \text{HO}_{2\text{aq}}$             | $\bar{k}_t(\text{H}_2\text{O})w_{l,i}$                                           |           |
| H 14 | $\text{HIO}_3 \xrightarrow{\text{H}_2\text{O}} \text{IO}_3^- + \text{H}^+$                                | $\bar{k}_t(\text{HIO}_3)w_{l,i}$                                                 |           |

For a definition of  $\bar{k}_t$  and  $w_{l,i}$  see Sander (1999).  $\text{Het}_T = [\text{H}_2\text{O}] + f(\text{Cl}^-)[\text{Cl}^-] + f(\text{Br}^-)[\text{Br}^-]$ , with  $f(\text{Cl}^-) = 5.0 \times 10^2$  and  $f(\text{Br}^-) = 3.0 \times 10^5$ . H4–H9: the total rate is determined by  $\bar{k}_t$ , the distribution among the different reaction paths was assumed to be the same as for reactions H1–H3.

Table 5: Aqueous phase equilibrium constants

| no    | reaction                                                                          | $m$ | $n$ | $K_0$ [M <sup>n-m</sup> ] | $-\Delta H/R$ [K] | reference       |
|-------|-----------------------------------------------------------------------------------|-----|-----|---------------------------|-------------------|-----------------|
| EQ 1  | $\text{CO}_{2\text{aq}} \rightleftharpoons \text{H}^+ + \text{HCO}_3^-$           | 1   | 2   | $4.3 \times 10^{-7}$      | -913              |                 |
| EQ 2  | $\text{NH}_{3\text{aq}} \rightleftharpoons \text{OH}^- + \text{NH}_4^+$           | 1   | 2   | $1.7 \times 10^{-5}$      | -4325             |                 |
| EQ 3  | $\text{H}_2\text{O}_{\text{aq}} \rightleftharpoons \text{H}^+ + \text{OH}^-$      | 1   | 2   | $1.0 \times 10^{-14}$     | -6716             |                 |
| EQ 4  | $\text{HCOOH}_{\text{aq}} \rightleftharpoons \text{H}^+ + \text{HCOO}^-$          | 1   | 2   | $1.8 \times 10^{-4}$      |                   |                 |
| EQ 5  | $\text{HSO}_3^- \rightleftharpoons \text{H}^+ + \text{SO}_3^{2-}$                 | 1   | 2   | $6.0 \times 10^{-8}$      | 1120              |                 |
| EQ 6  | $\text{H}_2\text{SO}_{4\text{aq}} \rightleftharpoons \text{H}^+ + \text{HSO}_4^-$ | 1   | 2   | $1.0 \times 10^3$         |                   |                 |
| EQ 7  | $\text{HSO}_4^- \rightleftharpoons \text{H}^+ + \text{SO}_4^{2-}$                 | 1   | 2   | $1.2 \times 10^{-2}$      | 1120              |                 |
| EQ 8  | $\text{HO}_{2\text{aq}} \rightleftharpoons \text{O}_2^- + \text{H}^+$             | 1   | 2   | $1.6 \times 10^{-5}$      |                   |                 |
| EQ 9  | $\text{SO}_{2\text{aq}} \rightleftharpoons \text{H}^+ + \text{HSO}_3^-$           | 1   | 2   | $1.7 \times 10^{-2}$      | 2090              |                 |
| EQ 10 | $\text{Cl}_2^- \rightleftharpoons \text{Cl}_{\text{aq}} + \text{Cl}^+$            | 1   | 2   | $5.2 \times 10^{-6}$      |                   |                 |
| EQ 11 | $\text{HOCl}_{\text{aq}} \rightleftharpoons \text{H}^+ + \text{ClO}^-$            | 1   | 2   | $3.2 \times 10^{-8}$      |                   |                 |
| EQ 12 | $\text{HBr}_{\text{aq}} \rightleftharpoons \text{H}^+ + \text{Br}^-$              | 1   | 2   | $1.0 \times 10^9$         |                   |                 |
| EQ 13 | $\text{Br}_2^- \rightleftharpoons \text{Br}_{\text{aq}} + \text{Br}^-$            | 1   | 2   | $9.1 \times 10^{-6}$      |                   |                 |
| EQ 14 | $\text{HOBr}_{\text{aq}} \rightleftharpoons \text{H}^+ + \text{BrO}^-$            | 1   | 2   | $2.3 \times 10^{-9}$      | -3091             |                 |
| EQ 15 | $\text{BrCl}_{\text{aq}} + \text{Cl}^- \rightleftharpoons \text{BrCl}_2^-$        | 2   | 1   | 3.8                       | 1143              |                 |
| EQ 16 | $\text{BrCl}_{\text{aq}} + \text{Br}^- \rightleftharpoons \text{Br}_2\text{Cl}^-$ | 2   | 1   | $1.8 \times 10^4$         |                   |                 |
| EQ 17 | $\text{Br}_{2\text{aq}} + \text{Cl}^- \rightleftharpoons \text{Br}_2\text{Cl}^-$  | 2   | 1   | 1.3                       |                   |                 |
| EQ 18 | $\text{HNO}_{3\text{aq}} \rightleftharpoons \text{H}^+ + \text{NO}_3^-$           | 1   | 2   | $1.5 \times 10^1$         |                   |                 |
| EQ 19 | $\text{HCl}_{\text{aq}} \rightleftharpoons \text{H}^+ + \text{Cl}^-$              | 1   | 2   | $1.7 \times 10^6$         |                   |                 |
| EQ 20 | $\text{HONO}_{\text{aq}} \rightleftharpoons \text{H}^+ + \text{NO}_2^-$           | 1   | 2   | $5.1 \times 10^{-4}$      | -1260             |                 |
| EQ 21 | $\text{HNO}_{4\text{aq}} \rightleftharpoons \text{NO}_4^- + \text{H}^+$           | 1   | 2   | $1.0 \times 10^{-5}$      | 8700              |                 |
| EQ 22 | $\text{ICl}_{\text{aq}} + \text{Cl}^- \rightleftharpoons \text{ICl}_2^-$          | 2   | 1   | $7.7 \times 10^1$         |                   |                 |
| EQ 23 | $\text{IBr}_{\text{aq}} + \text{Br}^- \rightleftharpoons \text{IBr}_2^-$          | 2   | 1   | $2.9 \times 10^2$         |                   |                 |
| EQ 24 | $\text{ICl}_{\text{aq}} + \text{Br}^- \rightleftharpoons \text{IClBr}^-$          | 2   | 1   | $1.8 \times 10^4$         |                   | assumed = EQ 16 |
| EQ 25 | $\text{IBr}_{\text{aq}} + \text{Cl}^- \rightleftharpoons \text{IClBr}^-$          | 2   | 1   | 1.3                       |                   | assumed = EQ 17 |

The temperature dependence is  $K' = K_0 \times \exp\left(-\frac{E_a}{R} \left(\frac{1}{T} - \frac{1}{T_0}\right)\right)$ , where  $T_0 = 298$  K.

Table 6: Henry Law coefficients

| species                       | $K_H^0$ [M/atm]      | $-\Delta_{soln}H/R[K]$ | reference                       | $\alpha^0$        | reference                                  |
|-------------------------------|----------------------|------------------------|---------------------------------|-------------------|--------------------------------------------|
| O <sub>3</sub>                | $1.2 \times 10^{-2}$ | 2560                   |                                 | 0.002             |                                            |
| O <sub>2</sub>                | $1.3 \times 10^{-3}$ | 1500                   |                                 | 0.01              | estimated by Pechtl et al. (2006)          |
| OH                            | $3.0 \times 10^1$    | 4300                   |                                 | 0.01              |                                            |
| HO <sub>2</sub>               | $3.9 \times 10^3$    | 5900                   |                                 | 0.2               |                                            |
| H <sub>2</sub> O <sub>2</sub> | $1.0 \times 10^5$    | 6338                   |                                 | 0.077             |                                            |
| NO <sub>2</sub>               | $6.4 \times 10^{-3}$ | 2500                   |                                 | 0.0015            |                                            |
| NO <sub>3</sub>               | 2.0                  | 2000                   |                                 | 0.04              |                                            |
| N <sub>2</sub> O <sub>5</sub> | $\infty$             | —                      |                                 | 0.03              | Behnke et al. (1997), see note             |
|                               |                      |                        |                                 | 0.003             | estimated by Allan et al. (1999), see note |
| HONO                          | $4.9 \times 10^1$    | 4780                   |                                 | 0.04              |                                            |
| HNO <sub>3</sub>              | $1.7 \times 10^5$    | 8694                   |                                 | 0.5               |                                            |
| HNO <sub>4</sub>              | $1.2 \times 10^4$    | 6900                   |                                 | 0.1               |                                            |
| NH <sub>3</sub>               | $5.8 \times 10^1$    | 4085                   |                                 | 0.06              |                                            |
| CH <sub>3</sub> OO            | 6.0                  | = HO <sub>2</sub>      |                                 | 0.01              | estimated by Pechtl et al. (2006)          |
| ROOH                          | $3.0 \times 10^2$    | 5322                   |                                 | 0.0046            |                                            |
| HCHO                          | $7.0 \times 10^3$    | 6425                   |                                 | 0.04              |                                            |
| HCOOH                         | $3.7 \times 10^3$    | 5700                   |                                 | 0.014             |                                            |
| CO <sub>2</sub>               | $3.1 \times 10^{-2}$ | 2423                   |                                 | 0.01              | estimated by Pechtl et al. (2006)          |
| HCl                           | 1.2                  | 9001                   |                                 | 0.074             |                                            |
| HOCl                          | $6.7 \times 10^2$    | 5862                   |                                 | = HOBr            | estimated by Pechtl et al. (2006)          |
| ClONO <sub>2</sub>            | $\infty$             | —                      |                                 | 0.1               |                                            |
| Cl <sub>2</sub>               | $9.1 \times 10^{-2}$ | 2500                   |                                 | 0.038             |                                            |
| HBr                           | 1.3                  | 10239                  |                                 | 0.031             |                                            |
| HOBr                          | $9.3 \times 10^1$    | = HOCl                 |                                 | 0.5               |                                            |
| BrONO <sub>2</sub>            | $\infty$             | —                      |                                 | 0.8               |                                            |
| Br <sub>2</sub>               | $7.6 \times 10^{-1}$ | 4094                   |                                 | 0.038             |                                            |
| BrCl                          | $9.4 \times 10^{-1}$ | 5600                   |                                 | = Cl <sub>2</sub> | estimated by Pechtl et al. (2006)          |
| DMSO                          | $5.0 \times 10^4$    | = HCHO                 |                                 | 0.048             |                                            |
| DMSO <sub>2</sub>             | $\infty$             | —                      |                                 | 0.03              |                                            |
| SO <sub>2</sub>               | 1.2                  | 3120                   |                                 | 0.11              |                                            |
|                               |                      |                        | assumed by Pechtl et al. (2006) |                   |                                            |

Table 6: Continued

| species                           | $K_H^0$ [M/atm]   | $-\Delta_{soln}H/R$ [K] | reference                       | $\alpha^0$ | reference                         |
|-----------------------------------|-------------------|-------------------------|---------------------------------|------------|-----------------------------------|
| H <sub>2</sub> SO <sub>4</sub>    | $\infty$          | —                       | assumed by Pechtl et al. (2006) | 0.65       | estimated by Pechtl et al. (2006) |
| CH <sub>3</sub> SO <sub>2</sub> H | $\infty$          | —                       |                                 | 0.0002     |                                   |
| CH <sub>3</sub> SO <sub>3</sub> H | $\infty$          | —                       | assumed by Pechtl et al. (2006) | 0.076      |                                   |
| HI                                | $\infty$          | —                       |                                 | 0.036      |                                   |
| IO                                | $4.5 \times 10^2$ | = HOI                   |                                 | 0.5        |                                   |
| HOI                               | $4.5 \times 10^2$ | = HOCl                  |                                 | HOBr       |                                   |
| INO <sub>2</sub>                  | $\infty$          | —                       |                                 | 0.2        |                                   |
| IONO <sub>2</sub>                 | $\infty$          | —                       |                                 | 0.2        |                                   |
| I <sub>2</sub>                    | 3.0               | 4431                    |                                 | 0.01       |                                   |
| ICl                               | $1.1 \times 10^2$ | = BrCl                  |                                 | 0.01       |                                   |
| IBr                               | $2.4 \times 10^1$ | = BrCl                  |                                 | 0.01       | estimated by Pechtl et al. (2006) |
| OIO                               | $\infty$          | —                       |                                 | 1          |                                   |
| HIO <sub>3</sub>                  | $\infty$          | —                       |                                 | 0.01       |                                   |

The temperature dependence for the Henry Law constants is  $K_H = K_H^0 \times \exp\left(\frac{-\Delta_{soln}H}{R}\left(\frac{1}{T} - \frac{1}{T_0}\right)\right)$ , where  $T_0 = 298$  K. No temperature dependence is considered for accommodation coefficients. Notes: The accommodation coefficient for N<sub>2</sub>O<sub>5</sub> is determined based on the composition of the condensed-phase. For the seasalt mode a value of 0.03 is used (Behnke et al., 1997), while the lower value of 0.003 is used for the non-seasalt mode (after estimations made by Allan et al., 1999).

## References

- Allan, B. J., Carslaw, N., Coe, H., Burgess, R. A., and Plane, J. M. C.: Observations of the Nitrate Radical in the Marine Boundary Layer, *Journal of Atmospheric Chemistry*, 33, 129–154, 1999.
- Atkinson, R., Cox, R. A., Crowley, J. N., R. F. Hampson, J., Hynes, R. G., Jenkin, M. E., Kerr, J. A., Rossi, M. J., and Troe, J.: Summary of Evaluated Kinetic and Photochemical Data for Atmospheric Chemistry, URL <http://www.iupac-kinetic.ch.cam.ac.uk>, 2006.
- Atkinson, R., Baulch, D. L., Cox, R. A., Crowley, J. N., Hampson, R. F., Hynes, R. G., Jenkin, M. E., Rossi, M. J., and Troe, J.: Evaluated kinetic and photochemical data for atmospheric chemistry: Volume III — reactions of inorganic halogens, *Atmospheric Chemistry and Physics*, 7, 981–1191, 2007.
- Behnke, W., George, C., Scheer, V., and Zetzsch, C.: Production and decay of  $\text{ClNO}_2$  from the reaction of gaseous  $\text{N}_2\text{O}_5$  with NaCl solution: Bulk and aerosol experiments, *Journal of Geophysical Research*, 102, 3795–3804, doi:10.1029/96JD03057, 1997.
- Damian, V., Sandu, A., Damian, M., Potra, F., and Carmichael, G. R.: The Kinetic PreProcessor KPP — A Software Environment for Solving Chemical Kinetics, *Computers and Chemical Engineering*, 26, 1567–1579, doi:10.1016/S0098-1354(02)00128-X, 2002.
- Gómez Martín, J. C., Spietz, P., and Burrows, J. P.: Spectroscopic studies of the  $\text{I}_2/\text{O}_3$  photochemistry Part 1: Determination of the absolute absorption cross sections of iodine oxides of atmospheric relevance, *Journal of Photochemistry and Photobiology A: Chemistry*, 176, 15–38, doi:10.1016/j.jphotochem.2005.09.024, 2005.
- Jayne, J. T., Pöschl, U., Chen, Y.-m., Dai, D., Molina, L. T., Worsnop, D. R., Kolb, C. E., and Molina, M. J.: Pressure and Temperature Dependence of the Gas-Phase Reaction of  $\text{SO}_3$  with  $\text{H}_2\text{O}$  and the Heterogeneous Reaction of  $\text{SO}_2$  with  $\text{H}_2\text{O}/\text{H}_2\text{SO}_4$  Surfaces, *Journal of Physical Chemistry A*, 101, 10 000–10 011, 1997.
- Kaltsoyannis, N. and Plane, J. M. C.: Quantum chemical calculations on a selection of iodine-containing species ( $\text{IO}$ ,  $\text{OIO}$ ,  $\text{INO}_3$ ,  $(\text{IO})_2$ ,  $\text{I}_2\text{O}_3$ ,  $\text{I}_2\text{O}_4$  and  $\text{I}_2\text{O}_5$ ) of importance in the atmosphere, *Physical chemistry chemical physics*, 10, 1723–1733, doi:10.1039/b715687c, 2008.
- Mahajan, A. S., Oetjen, H., Saiz-Lopez, A., Lee, J. D., McFiggans, G. B., and Plane, J. M. C.: Reactive iodine species in a semi-polluted environment, *Geophysical Research Letters*, 36, doi:10.1029/2009GL038018, 2009.
- Pechtl, S., Lovejoy, E. R., Burkholder, J. B., and von Glasow, R.: Modeling the possible role of iodine oxides in atmospheric new particle formation, *Atmospheric Chemistry and Physics*, 6, 505–523, 2006.
- Saiz-Lopez, A., Plane, J. M. C., Mahajan, A. S., Anderson, P. S., Bauguitte, S. J.-B., Jones, A. E., Roscoe, H. K., Salmon, R. A., Bloss, W. J., Lee, J. D., and Heard, D. E.: On the vertical distribution of boundary layer halogens over coastal Antarctica: implications for  $\text{O}_3$ ,  $\text{HO}_x$ ,  $\text{NO}_x$  and the Hg lifetime, *Atmospheric Chemistry and Physics*, 8, 887–900, 2008.
- Sander, R.: Modeling atmospheric chemistry: interactions between gas-phase species and liquid cloud/aerosol particles, *Surveys in Geophysics*, 20, 1–31, 1999.
- Sander, S. P., Friedl, R. R., Ravishankara, A. R., Golden, D. M., Kolb, C. E., Kurylo, M. J., Molina, M. J., Moortgat, G. K., Keller-rudek, H., Finlayson-pitts, B. J., Wine, P. H., Huie, R. E., and Orkin, V. L.: Chemical kinetics and photochemical data for use in atmospheric studies. Evaluation number 15, 2006.
- Saunders, R. W. and Plane, J. M. C.: Formation Pathways and Composition of Iodine Oxide Ultra-Fine Particles, *Environmental Chemistry*, 2, 299, doi:10.1071/EN05079, 2005.
