# Supplementary figures and images for: Modelling multi-phase halogen chemistry in the coastal marine boundary layer: investigation of the relative importance of local chemistry vs. long-range transport
Source: Copernicus journal article supplement (doi:10.5194/acp-11-979-2011), 2011-02-02

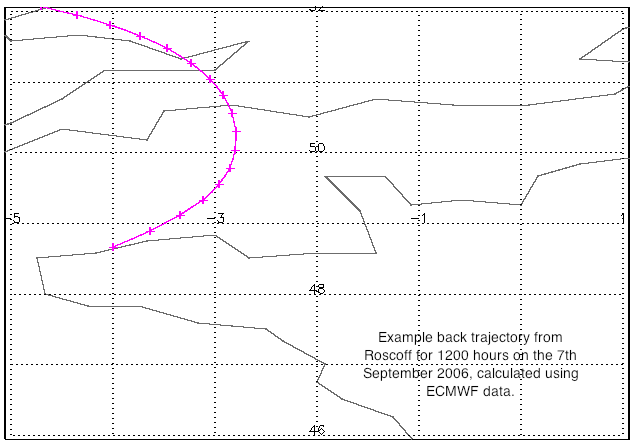

Supplement: Supplementary file 1 [file acp-11-979-2011-supplement.zip › 07sept1200backtraj.png]

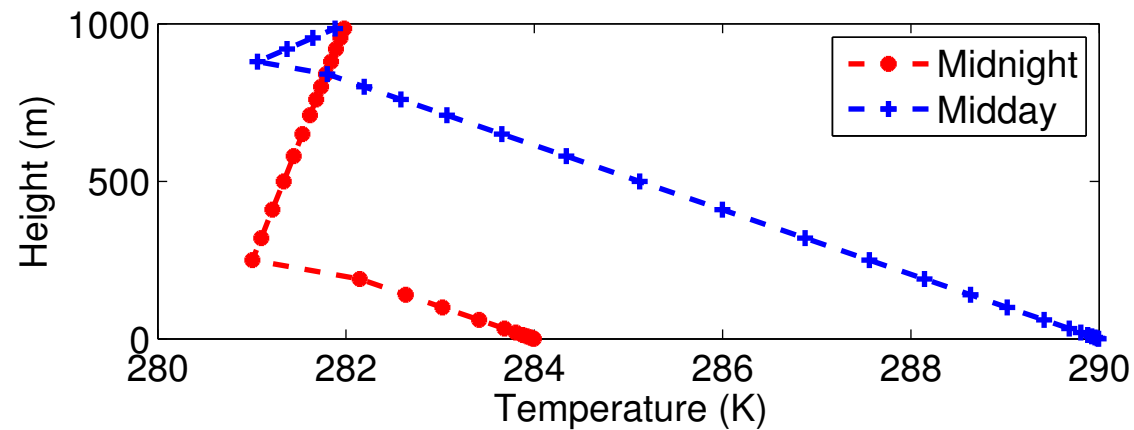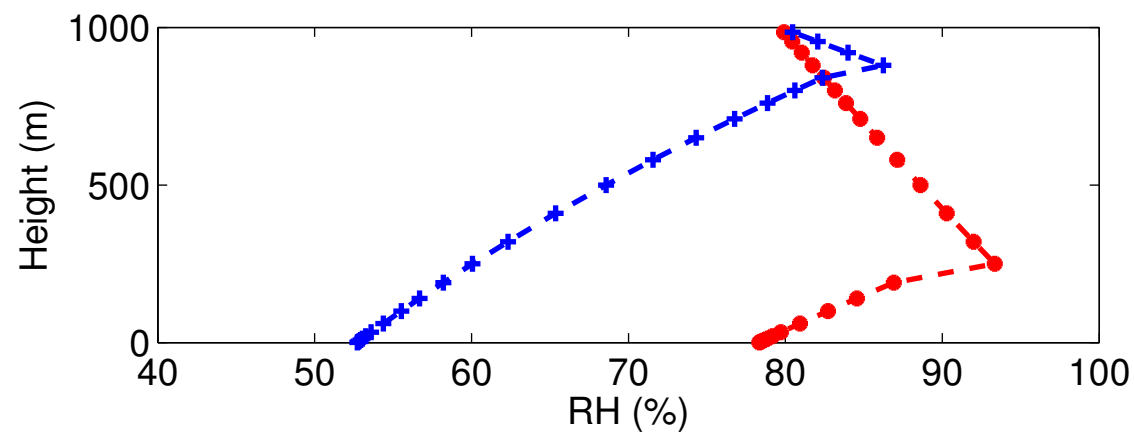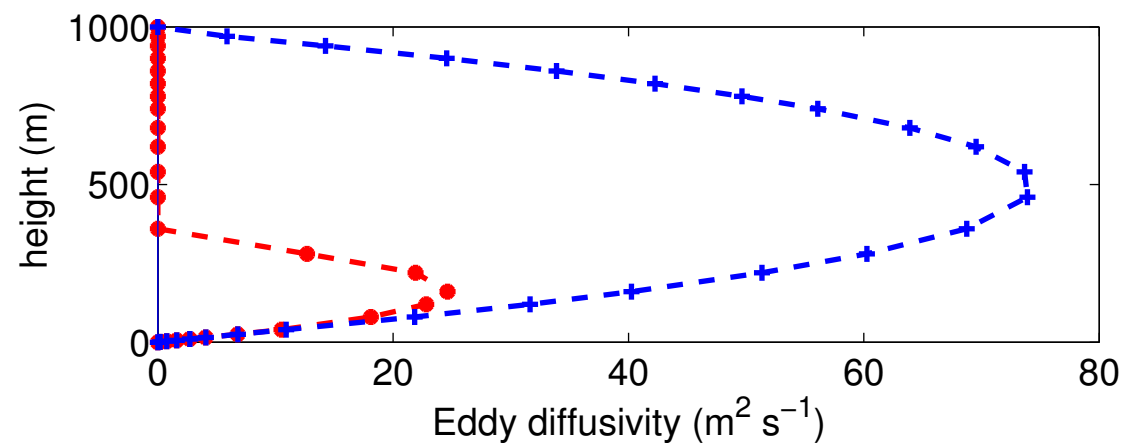

Supplement: Supplementary file 1 [file acp-11-979-2011-supplement.zip › vertical_met.pdf]

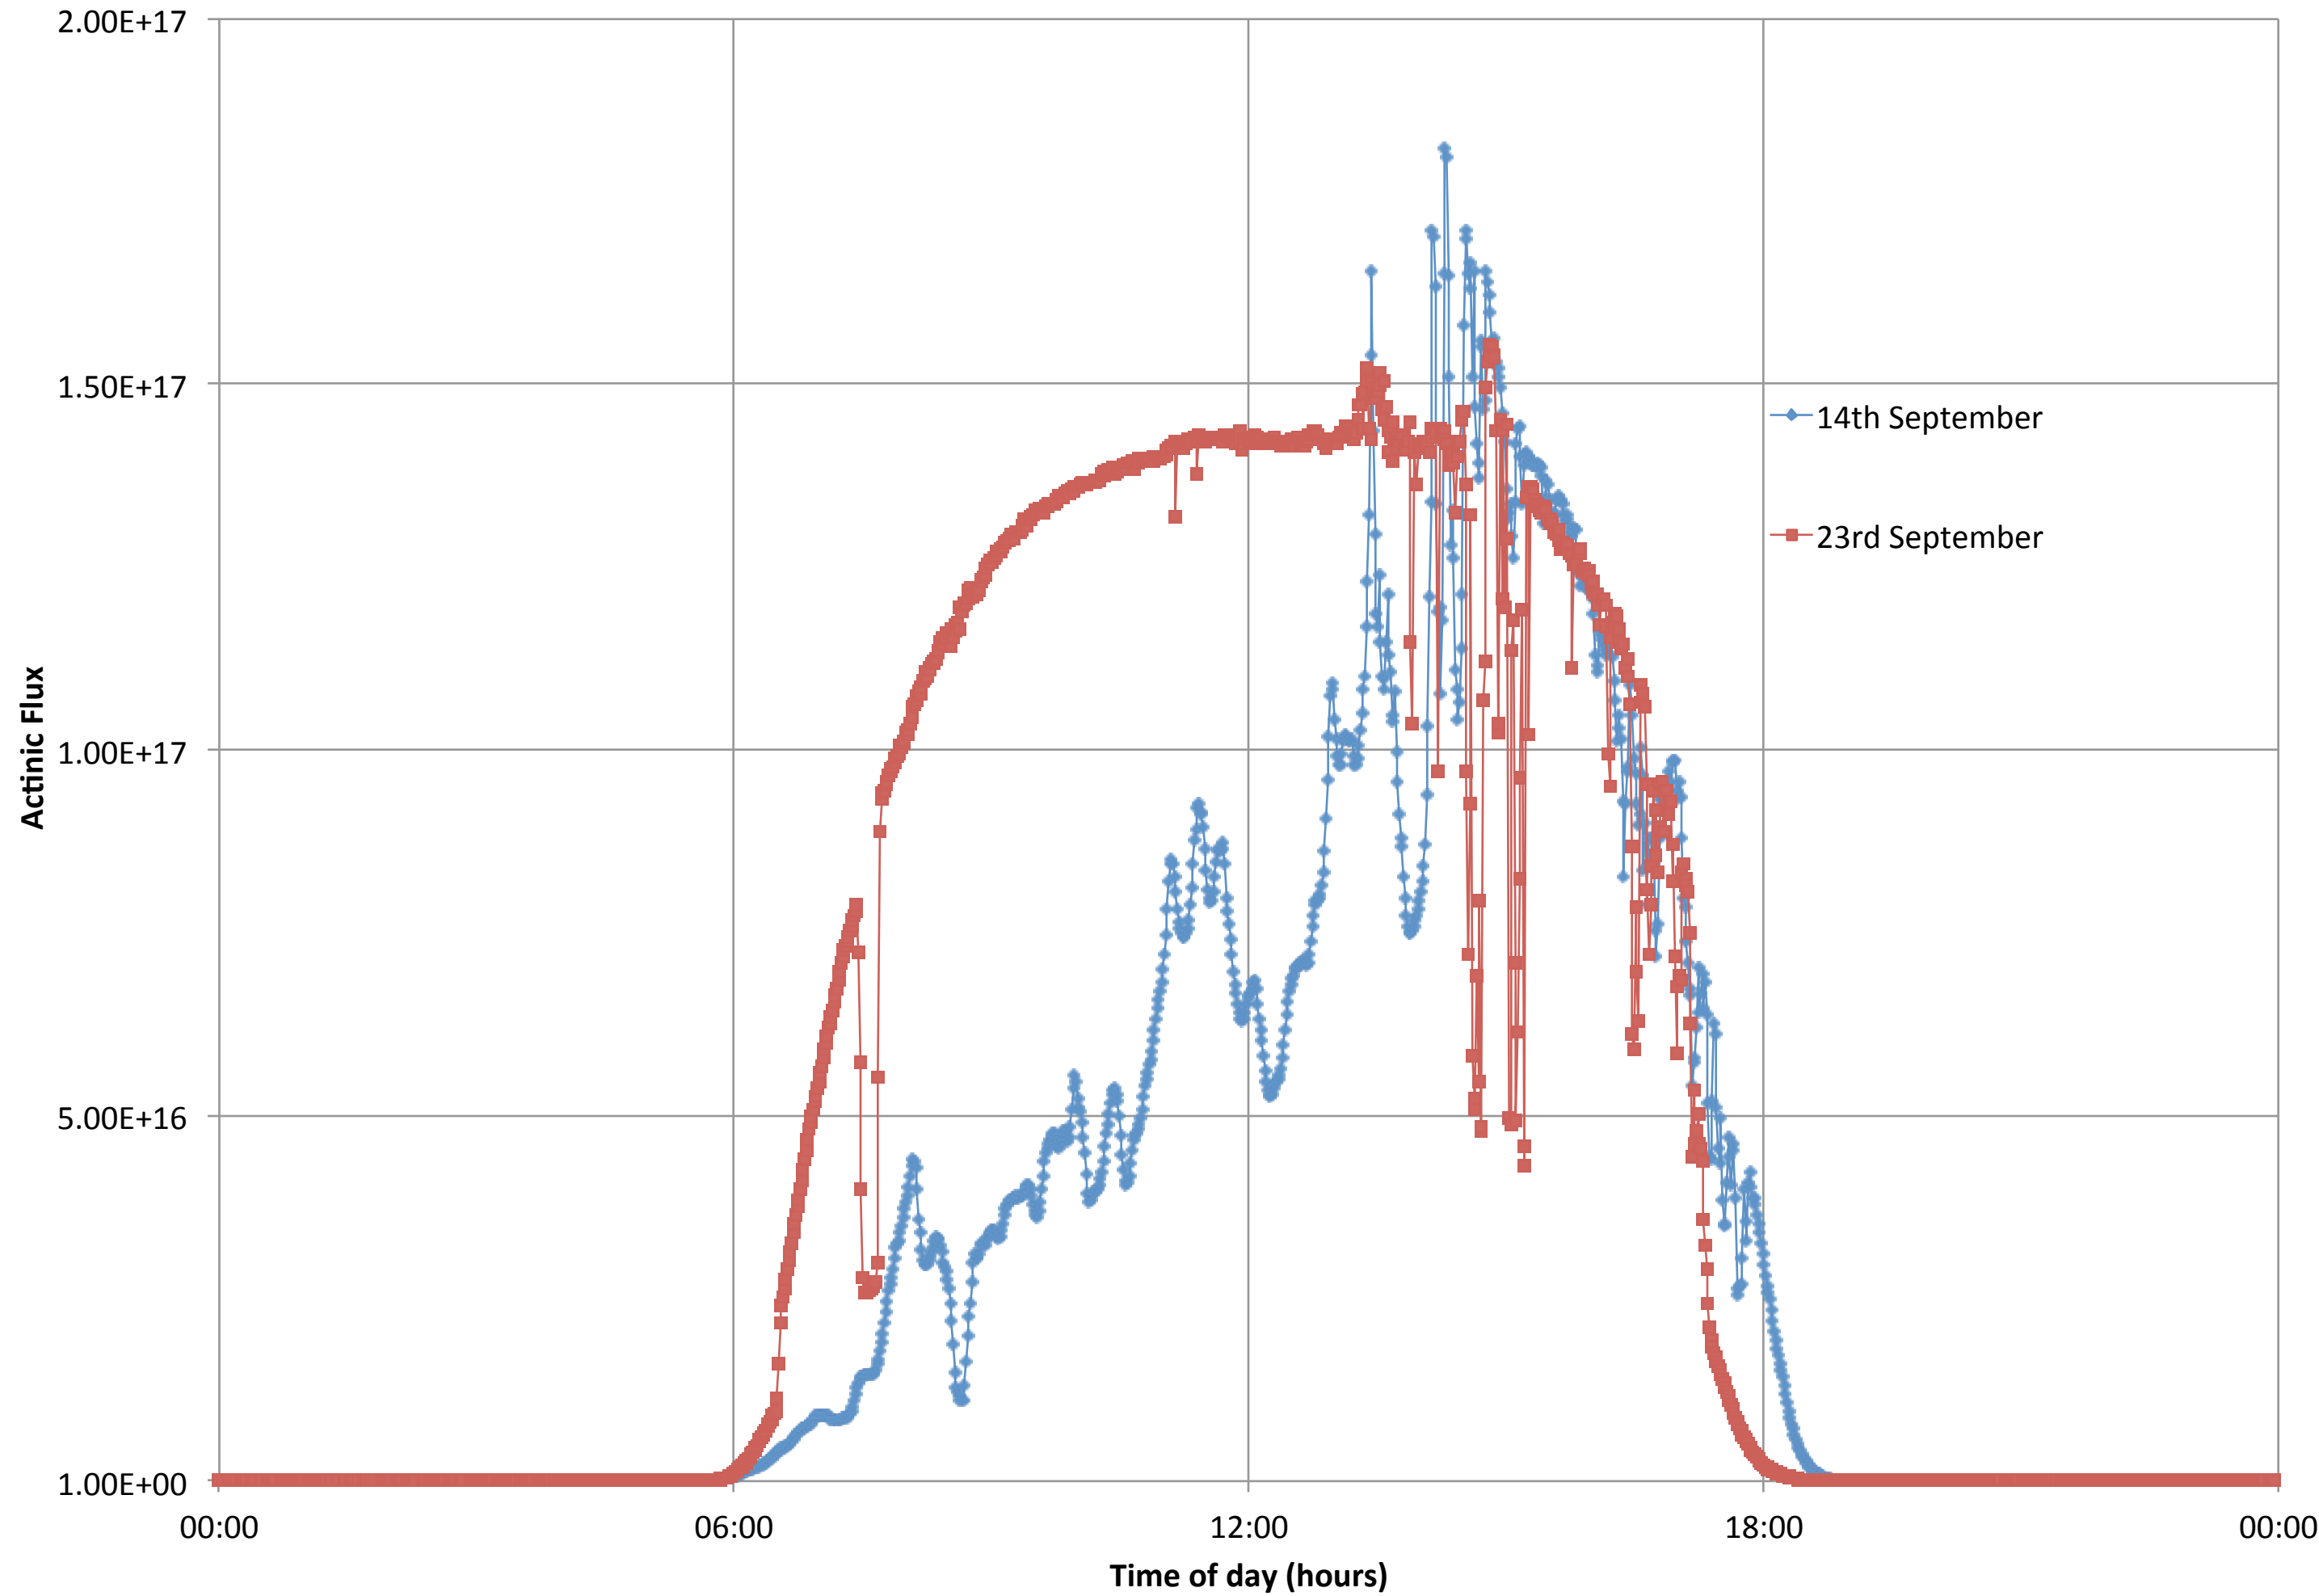

Supplement: Supplementary file 1 [file acp-11-979-2011-supplement.zip › diurnal_photolysis_profiles.pdf]
